# Supplementary material for: Systematics and Phylogeography of The Non-Ethiopian Speckled-Pelage Brush-Furred Rats (Lophuromys Flavopunctatus Group) Inferred From Integrative Genetics and Morphometry
Source: Research Square preprint supplement (doi:10.21203/rs.3.rs-157741/v1), 2021-02-01
Supplement: Supplementary file 1 [file 5f2b780bf41df04c14155bbd.xlsx]

## Sheet: Table S1
	Table S1 The complete list of samples used in the study.
										Included in final analyses					Sampling locality details
	Sample ID	Species [binomial]	Species group	Haplotype	mPTP	branchcut	CYTB analyses	COI available	IRBP available	CYTB	COI	IRBP	Linear	Geometric	Latitude	Longitude	Locality [short]	Country [ISO code]	original Sampled ID	voucher catalogue number	collection year	sex	age	CS	CI	ZB	BBC	PPL	LD	BOC	BM1	LIF	IOB	LAB	ALM	BR	LBP	BZP	Reference/Source	Reference/Source ID	Note	Sample ID duplicate
	FMNH174237	Lophuromys aquilus	aquilus						Yes				Yes	Yes	37.447	-3.20765	Kilimanjaro	TZ	Kilimanjaro_TZ_FMNH174237	FMNH: 174237	2002	Male	Old adult	56.16	29.07	14.78	12.74	12.29	8.66	7.27	6.79	6.87	6.02	5.37	4.63	5.21	4.24	2.71	GenBank	MN808295		FMNH174237
	FMNH174239	Lophuromys aquilus	aquilus	H_50	54	35	Yes	Yes	Yes	Yes	Yes	Yes	Yes	Yes	-3.20765	37.447	Kilimanjaro	TZ	Kilimanjaro_TZ_FMNH174239	FMNH: 174239	2002	Female	Adult	57.86	29.84	15.14	13.42	12.78	8.77	7.48	6.73	6.42	6.03	5.34	4.68	4.97	4.35	2.97	GenBank	MN808296		FMNH174239
	FMNH174241	Lophuromys aquilus	aquilus										Yes	Yes	37.447	-3.20765	Kilimanjaro	TZ	Kilimanjaro_TZ_FMNH174241	FMNH: 174241	2002	Female	Adult	55.12	28.41	14.37	12.99	12.1	8.5	6.89	6.68	6.62	6.08	5.27	4.74	4.77	3.76	2.68	New [this study]			FMNH174241
	FMNH174242	Lophuromys aquilus	aquilus						Yes				Yes	Yes	37.4402	-3.17712	Kilimanjaro	TZ	Kilimanjaro_TZ_FMNH174242	FMNH: 174242	2002	Female	Old adult	56.38	28.86	14.93	12.83	12.44	8.72	7.01	6.76	6.83	6.07	5.55	4.45	4.91	3.92	2.9	GenBank	MN808293		FMNH174242
	FMNH174244	Lophuromys aquilus	aquilus						Yes				Yes	Yes	37.4402	-3.17712	Kilimanjaro	TZ	Kilimanjaro_TZ_FMNH174244	FMNH: 174244	2002	Male	Adult	57.02	29.41	14.49	12.64	12.61	8.86	6.92	6.63	6.58	6.02	5.61	4.92	5	4.18	2.73	GenBank	MN808294		FMNH174244
	FMNH174248	Lophuromys aquilus	aquilus										Yes	Yes	37.4402	-3.17712	Kilimanjaro	TZ	Kilimanjaro_TZ_FMNH174248	FMNH: 174248	2002	Male	Old adult	57.23	29.28	15.31	13.24	12.35	9.09	7.22	6.58	6.65	6.13	5.66	4.57	5.38	4.36	2.82	New [this study]			FMNH174248
	FMNH174250	Lophuromys aquilus	aquilus										Yes	Yes	37.4402	-3.17712	Kilimanjaro	TZ	Kilimanjaro_TZ_FMNH174250	FMNH: 174250	2002	Female	Old adult	56.38	28.85	15.44	13.2	12.52	8.53	7.16	6.72	6.3	5.97	5.46	4.61	5.01	4.17	2.76	New [this study]			FMNH174250
	FMNH174255	Lophuromys aquilus	aquilus				Yes	Yes					Yes	Yes	37.4584	-3.24007	Kilimanjaro	TZ	Kilimanjaro_TZ_FMNH174255	FMNH: 174255	2002	Female	Old adult	57.3	29.42	14.88	13.16	12.28	8.69	7.28	6.85	6.43	5.98	5.62	4.89	4.78	4.39	2.91	New [this study]			FMNH174255
	FMNH174257	Lophuromys aquilus	aquilus				Yes	Yes					Yes	Yes	37.4584	-3.24007	Kilimanjaro	TZ	Kilimanjaro_TZ_FMNH174257	FMNH: 174257	2002	Male	Old adult	57.93	29.85	15.06	12.87	12.41	8.83	7.31	6.67	7.24	6.23	5.44	4.83	5.14	4.33	2.84	New [this study]			FMNH174257
	FMNH174258	Lophuromys aquilus	aquilus										Yes	Yes	37.4584	-3.24007	Kilimanjaro	TZ	Kilimanjaro_TZ_FMNH174258	FMNH: 174258	2002	Male	Old adult	57.81	29.66	14.69	13.1	12.73	8.8	7.2	6.81	7.03	6.11	5.55	4.69	5.19	4.05	2.69	New [this study]			FMNH174258
	FMNH174260	Lophuromys aquilus	aquilus										Yes	Yes	37.4584	-3.24007	Kilimanjaro	TZ	Kilimanjaro_TZ_FMNH174260	FMNH: 174260	2002	Male	Adult	55.88	28.79	14.47	12.65	12.41	8.4	7.4	6.59	6.64	5.8	5.51	4.72	5.05	3.87	2.88	New [this study]			FMNH174260
	FMNH174262	Lophuromys aquilus	aquilus										Yes	Yes	37.4584	-3.24007	Kilimanjaro	TZ	Kilimanjaro_TZ_FMNH174262	FMNH: 174262	2002	Male	Old adult	57.76	29.76	15.11	13.02	13	8.81	7.19	6.88	7.12	6.26	5.5	4.94	5.18	4.02	2.86	New [this study]			FMNH174262
	FMNH174264	Lophuromys aquilus	aquilus										Yes	Yes	37.4584	-3.24007	Kilimanjaro	TZ	Kilimanjaro_TZ_FMNH174264	FMNH: 174264	2002	Female	Old adult	56.66	29.24	14.58	12.83	12.29	8.81	7.17	6.72	6.85	5.98	5.34	4.7	5.2	4.29	2.64	New [this study]			FMNH174264
	MN808293	Lophuromys aquilus	aquilus	H_49	54	35	Yes	Yes		Yes	Yes	Yes			-3.17712	37.4402	Kilimanjaro	TZ	Kilimanjaro_TZ_FMNH174242																				GenBank	MN808293		MN808293
	MN808294	Lophuromys aquilus	aquilus	H_49	54	35	Yes	Yes		Yes	Yes	Yes			-3.17712	37.4402	Kilimanjaro	TZ	Kilimanjaro_TZ_FMNH174244																				GenBank	MN808294		MN808294
	MN808295	Lophuromys aquilus	aquilus	H_50	54	35	Yes	Yes		Yes	Yes	Yes			-3.20765	37.447	Kilimanjaro	TZ	Kilimanjaro_TZ_FMNH174237																				GenBank	MN808295		MN808295
	RUCAx14378	Lophuromys aquilus	aquilus	H_48	54	35	Yes			Yes					-3.08	37.2	Mweka	TZ	RUCAx14378																				African Mammalia			RUCAx14378
	FMNH171642	Lophuromys cf. cinereus	aquilus										Yes	Yes	28.8117	-2.23965	Centre	CD	Centre_CD_FMNH171642	FMNH: 171642	2001	Female	Young adult	52.37	26.52	13.97	12.61	10.78	7.32	7.4	6.46	6.25	5.95	5.1	4.53	4.71	3.76	2.69	New [this study]			FMNH171642
	FMNH171646	Lophuromys cf. cinereus	aquilus										Yes	Yes	28.8117	-2.23965	Centre	CD	Centre_CD_FMNH171646	FMNH: 171646	2001	Male	Old adult	57.44	29.24	15.17	13.41	12.79	8.58	6.92	6.99	6.54	6.59	5.27	4.68	5.16	3.94	2.94	New [this study]			FMNH171646
	FMNH171648	Lophuromys cf. cinereus	aquilus										Yes	Yes	28.8117	-2.23965	Centre	CD	Centre_CD_FMNH171648	FMNH: 171648	2001	Male	Adult	59.62	30.65	15.86	13.2	13.7	9.06	7.65	7.05	7.42	6.5	5.57	4.59	5.13	3.7	3.06	New [this study]			FMNH171648
	FMNH171657	Lophuromys cf. cinereus	aquilus	H_144	26	34	Yes			Yes			Yes	Yes	-2.31515	28.7587	Idjwi	CD	Idjwi_CD_FMNH171657	FMNH: 171657	2001	Male	Adult	56.63	28.98	15.46	13.27	12.06	8.57	7.35	7.17	6.17	6.44	5.7	4.74	5.23	4.44	2.65	New [this study]			FMNH171657
	FMNH171658	Lophuromys cf. cinereus	aquilus				Yes						Yes	Yes	28.7587	-2.31515	Washiba	CD	Washiba_CD_FMNH171658	FMNH: 171658	2001	Female	Young adult	54.03	27.67	14.45	13.07	11.99	7.7	7.02	6.62	6.1	6.24	5.5	4.75	4.77	3.74	2.7	New [this study]			FMNH171658
	FMNH171659	Lophuromys cf. cinereus	aquilus				Yes						Yes	Yes	28.7587	-2.31515	Washiba	CD	Washiba_CD_FMNH171659	FMNH: 171659	2001	Male	Adult	57.89	29.45	15.33	13.29	12.89	7.96	7.29	7.01	6.01	6.68	5.55	5.06	5.1	4.49	2.85	New [this study]			FMNH171659
	FMNH171660	Lophuromys cf. cinereus	aquilus				Yes						Yes	Yes	28.7587	-2.31515	Washiba	CD	Washiba_CD_FMNH171660	FMNH: 171660	2001	Male	Adult	58.84	30.05	15.62	13.72	13.31	8.42	7.39	6.82	6.33	6.54	5.76	4.74	5.21	4.25	2.84	New [this study]			FMNH171660
	FMNH171661	Lophuromys cf. cinereus	aquilus				Yes						Yes	Yes	28.7587	-2.31515	Washiba	CD	Washiba_CD_FMNH171661	FMNH: 171661	2001	Female	Young adult	56.27	28.86	14.92	13.63	12.52	8.1	7.49	6.68	6.1	6.25	5.64	4.77	5.14	3.87	2.74	New [this study]			FMNH171661
	FMNH173353	Lophuromys cf. cinereus	aquilus										Yes	Yes	28.8117	-2.23965	Centre	CD	Centre_CD_FMNH173353	FMNH: 173353	2002	Male	Young adult	57.8	29.12	15.78	12.97	12.68	8.19	7.06	6.77	6.5	6.13	5.55	4.77	5	4.16	2.85	New [this study]			FMNH173353
	FMNH173358	Lophuromys cf. cinereus	aquilus										Yes	Yes	28.8117	-2.23965	Centre	CD	Centre_CD_FMNH173358	FMNH: 173358	2002	Female	Young adult	57.12	29.19	15.35	13.11	12.42	8.14	7.21	6.73	7.14	6.17	5.54	5	4.74	3.58	2.9	New [this study]			FMNH173358
	FMNH173361	Lophuromys cf. cinereus	aquilus										Yes	Yes	28.8117	-2.23965	Centre	CD	Centre_CD_FMNH173361	FMNH: 173361	2002	Female	Young adult	54.67	28.15	14.58	12.79	12.11	7.74	6.99	6.66	6.17	5.96	5.3	4.86	4.91	4.09	2.64	New [this study]			FMNH173361
	FMNH173362	Lophuromys cf. cinereus	aquilus										Yes	Yes	28.8117	-2.23965	Centre	CD	Centre_CD_FMNH173362	FMNH: 173362	2002	Male	Young adult	57.9	29.62	16.12	13.96	12.5	8.44	7.32	6.86	7	6.61	5.78	4.7	5.24	4.05	3.01	New [this study]			FMNH173362
	FMNH173363	Lophuromys cf. cinereus	aquilus										Yes	Yes	28.8117	-2.23965	Centre	CD	Centre_CD_FMNH173363	FMNH: 173363	2002	Female	Young adult	55.88	29.67	15.36	13.52	12.47	8.52	7.45	6.82	6.68	6.54	5.68	4.77	5.41	4.01	3.04	New [this study]			FMNH173363
	FMNH173367	Lophuromys cf. cinereus	aquilus										Yes	Yes	28.8638	-2.216	Petit	CD	Petit_CD_FMNH173367	FMNH: 173367	2002	Female	Young adult	58.47	30	16.11	13.41	12.88	8.59	7.25	7.11	6.56	6.57	5.26	5.01	5.06	4.23	3.01	New [this study]			FMNH173367
	FMNH173368	Lophuromys cf. cinereus	aquilus										Yes	Yes	28.8638	-2.216	Petit	CD	Petit_CD_FMNH173368	FMNH: 173368	2002	Female	Young adult	57	29.21	15.27	13.2	12.59	8.2	7.09	6.93	6.69	6.28	5.54	5.02	4.98	3.82	2.83	New [this study]			FMNH173368
	FMNH173375	Lophuromys cf. cinereus	aquilus										Yes	Yes	28.8638	-2.216	Petit	CD	Petit_CD_FMNH173375	FMNH: 173375	2002	Male	Young adult	57.73	29.43	15.92	13.03	12.7	8.44	7.07	6.98	6.13	6.48	5.69	4.68	5.1	4.34	2.94	New [this study]			FMNH173375
	FMNH173376	Lophuromys cf. cinereus	aquilus										Yes	Yes	28.8638	-2.216	Petit	CD	Petit_CD_FMNH173376	FMNH: 173376	2002	Male	Adult	56.31	29.19	15.46	13.02	12.4	8.87	7.04	6.72	6.53	6.02	5.5	4.57	5.2	4	2.86	New [this study]			FMNH173376
	FMNH189138	Lophuromys cf. cinereus	aquilus	H_144	26	34	Yes			Yes					-2.18588	28.7214	Kahuzi	CD	Kahuzi_CD_FMNH189138																				New [this study]			FMNH189138
	FMNH189141	Lophuromys cf. cinereus	aquilus										Yes	Yes	28.7653	-2.27341	Kahuzi	CD	KahuziBiega_CD_FMNH189141	FMNH: 189141	2005	Male	Old adult	55.14	28.29	16.09	13.8	12.22	7.87	7.53	7.47	6.01	6.77	5.62	5.09	5.22	3.83	2.97	New [this study]			FMNH189141
	FMNH189143	Lophuromys cf. cinereus	aquilus										Yes	Yes	28.7653	-2.27341	Kahuzi	CD	KahuziBiega_CD_FMNH189143	FMNH: 189143	2005	Female	Old adult	60.6	30.93	16.38	13.54	12.97	9.09	7.59	7.45	7.13	6.72	5.82	5.34	5.53	4.35	3.26	New [this study]			FMNH189143
	FMNH189146	Lophuromys cf. cinereus	aquilus										Yes	Yes	28.6895	-2.28062	Kahuzi	CD	KahuziBiega_CD_FMNH189146	FMNH: 189146	2005	Female	Young adult	55.7	28.64	14.23	12.55	12.29	8.27	7.15	6.55	6.52	6.03	5.33	4.81	4.82	4.08	2.83	New [this study]			FMNH189146
	FMNH189147	Lophuromys cf. cinereus	aquilus										Yes	Yes	28.6895	-2.28062	Kahuzi	CD	KahuziBiega_CD_FMNH189147	FMNH: 189147	2005	Male	Adult	54.93	28.25	15.07	12.7	12.04	8.06	6.93	6.7	6.4	6.22	5.34	4.73	5.47	3.89	2.82	New [this study]			FMNH189147
	FMNH189302	Lophuromys cf. cinereus	aquilus										Yes	Yes	28.6895	-2.28062	Kahuzi	CD	KahuziBiega_CD_FMNH189302	FMNH: 189302	2003	Female	Old adult	55.89	28.26	15.51	13.21	11.8	8.4	7.03	6.79	6.56	6.03	5.73	4.59	4.58	4.03	2.8	New [this study]			FMNH189302
	FMNH189304	Lophuromys cf. cinereus	aquilus										Yes	Yes	28.7509	-2.31036	Kahuzi	CD	KahuziBiega_CD_FMNH189304	FMNH: 189304	2003	Male	Young adult	55.44	28.29	16.04	13.04	12.23	8.02	7.19	7.22	6.32	6.42	5.09	4.82	5.35	3.75	3.02	New [this study]			FMNH189304
	FMNH189306	Lophuromys cf. cinereus	aquilus										Yes		28.7509	-2.31036	Kahuzi	CD	KahuziBiega_CD_FMNH189306	FMNH: 189306	2003	Female	Adult		29.15	15.65	13.03	11.92	8.23	7.02	6.82	6.7	6.37	5.75	4.99	5.23	4.4	3.15	New [this study]			FMNH189306
	FMNH189311	Lophuromys cf. cinereus	aquilus										Yes	Yes	28.7616	-2.26775	Kahuzi	CD	KahuziBiega_CD_FMNH189311	FMNH: 189311	2003	Male	Young adult	55.27	28.34	14.75	12.53	12.42	7.9	6.87	6.84	6.42	6.08	5.12	5.02	4.9	3.55	2.83	New [this study]			FMNH189311
	FMNH189316	Lophuromys cf. cinereus	aquilus										Yes	Yes	28.7764	-2.2115	Kahuzi	CD	KahuziBiega_CD_FMNH189316	FMNH: 189316	2004	Female	Young adult	54.63	28.29	14.63	12.9	12.1	8.15	7.27	6.67	6.52	6.32	5.52	4.8	4.93	3.47	3.11	New [this study]			FMNH189316
	FMNH189322	Lophuromys cf. cinereus	aquilus										Yes	Yes	28.7764	-2.2115	Kahuzi	CD	KahuziBiega_CD_FMNH189322	FMNH: 189322	2004	Male	Adult	55.9	28.64	15.05	13.02	12.3	8.11	7.21	6.99	6.96	6.11	5.68	5.01	5.02	3.52	2.87	New [this study]			FMNH189322
	FMNH189323	Lophuromys cf. cinereus	aquilus										Yes	Yes	28.7764	-2.2115	Kahuzi	CD	KahuziBiega_CD_FMNH189323	FMNH: 189323	2004	Male	Old adult	55.02	29.44	15.42	13.24	12.51	8.78	7.55	7.39	6.43	6.33	5.38	4.83	4.94	4.25	3.23	New [this study]			FMNH189323
	FMNH189324	Lophuromys cf. cinereus	aquilus	H_147	26	34	Yes								-2.18588	28.7214	Kahuzi	CD	Kahuzi_CD_FMNH189324																				New [this study]			FMNH189324
	FMNH189334	Lophuromys cf. cinereus	aquilus										Yes	Yes	28.7738	-2.22359	Kahuzi	CD	KahuziBiega_CD_FMNH189334	FMNH: 189334	2005	Male	Young adult	52.04	28.21	14.31	12.56	11.94	8.02	6.96	6.43	6.9	5.91	5.3	4.82	4.78	3.52	2.71	New [this study]			FMNH189334
	FMNH189343	Lophuromys cf. cinereus	aquilus										Yes	Yes	28.7738	-2.22359	Kahuzi	CD	KahuziBiega_CD_FMNH189343	FMNH: 189343	2005	Female	Young adult	55.41	26.35	14.18	12.51	11.17	7.35	6.77	6.3	5.99	5.63	5.23	4.59	4.77	4.03	2.82	New [this study]			FMNH189343
	FMNH189347	Lophuromys cf. cinereus	aquilus										Yes	Yes	28.7653	-2.27341	Kahuzi	CD	KahuziBiega_CD_FMNH189347	FMNH: 189347	2005	Male	Adult	57.67	28.63	15.01	13.05	11.68	8.4	6.99	6.92	6.63	6.28	5.35	4.91	4.9	3.97	2.72	New [this study]			FMNH189347
	FMNH189348	Lophuromys cf. cinereus	aquilus	H_149	26	34	Yes								-2.18588	28.7214	Kahuzi	CD	Kahuzi_CD_FMNH189348																				New [this study]			FMNH189348
	FMNH189349	Lophuromys cf. cinereus	aquilus	H_148	26	34	Yes			Yes					-2.18588	28.7214	Kahuzi	CD	Kahuzi_CD_FMNH189349																				New [this study]			FMNH189349
	FMNH189359	Lophuromys cf. cinereus	aquilus										Yes	Yes	28.7505	-2.33513	Kahuzi	CD	KahuziBiega_CD_FMNH189359	FMNH: 189359	2005	Male	Adult	57.3	29.67	15.55	13.18	13.33	8.58	7.27	7.01	6.23	6.32	5.78	4.81	5.14	4.03	2.75	New [this study]			FMNH189359
	FMNH189369	Lophuromys cf. cinereus	aquilus										Yes		28.7505	-2.33513	Kahuzi	CD	KahuziBiega_CD_FMNH189369	FMNH: 189369	2005	Male	Young adult		29.14	15.11	12.53	12.25	8.55	7.25	6.61	6.74	6.3	5.55	4.88	5.02	4.04	2.91	New [this study]			FMNH189369
	FMNH195092	Lophuromys cf. cinereus	aquilus	H_152	26	34	Yes			Yes					-5.24891	29.1159	Kabobo	CD	Kabobo_CD_FMNH195092																				New [this study]			FMNH195092
	FMNH195093	Lophuromys cf. cinereus	aquilus	H_151	26	34	Yes								-5.24891	29.1159	Kabobo	CD	Kabobo_CD_FMNH195093																				New [this study]			FMNH195093
	FMNH195094	Lophuromys cf. cinereus	aquilus	H_151	26	34	Yes	Yes	Yes	Yes	Yes	Yes	Yes	Yes	-5.4525	29.2867	Mizimu	CD	Mizimu_CD_FMNH195094	FMNH: 195094	2007	Female	Old adult	57.54	29.54	15.24	13.07	12.44	8.37	7.01	7.16	6.32	6.27	5.25	5.03	5.26	4.54	3.14	New [this study]			FMNH195094
	FMNH195095	Lophuromys cf. cinereus	aquilus				Yes	Yes					Yes	Yes	29.2867	-5.4525	Mizimu	CD	Mizimu_CD_FMNH195095	FMNH: 195095	2007	Female	Young adult	55.94	28.02	14.49	12.79	11.99	7.69	6.78	6.87	6.2	6	5.05	5.36	5.09	4.32	2.87	New [this study]			FMNH195095
	FMNH195096	Lophuromys cf. cinereus	aquilus	H_152	26	34	Yes								-5.4792	29.2728	Kabobo	CD	Kabobo_CD_FMNH195096																				New [this study]			FMNH195096
	FMNH195097	Lophuromys cf. cinereus	aquilus	H_152	26	34	Yes								-5.4792	29.2728	Kabobo	CD	Kabobo_CD_FMNH195097																				New [this study]			FMNH195097
	FMNH195184	Lophuromys cf. cinereus	aquilus	H_151	26	34	Yes			Yes					-4.9847	29.0928	Kabobo	CD	Kabobo_CD_FMNH195184																				New [this study]			FMNH195184
	FMNH195186	Lophuromys cf. cinereus	aquilus	H_152	26	34	Yes								-4.9847	29.0928	Kabobo	CD	Kabobo_CD_FMNH195186																				New [this study]			FMNH195186
	FMNH203774	Lophuromys cf. cinereus	aquilus	H_153	26	34	Yes								-3.33735	28.7558	Itombwe	CD	Itombwe_CD_FMNH203774																				New [this study]			FMNH203774
	FMNH203775	Lophuromys cf. cinereus	aquilus										Yes	Yes	28.7558	-3.33735	Itombwe	CD	Itombwe_CD_FMNH203775	FMNH: 203775	2008	Female	Young adult	56.04	28.41	15.42	13.29	11.93	7.97	7.57	7	6.01	6.23	5.79	4.91	4.86	4.41	3.03	New [this study]			FMNH203775
	FMNH203783	Lophuromys cf. cinereus	aquilus										Yes	Yes	29.0141	-3.36878	Itombwe	CD	Itombwe_CD_FMNH203783	FMNH: 203783	2008	Female	Adult	55.78	28.37	15.54	13.45	12.11	8.1	7.21	7.13	5.99	6.29	5.41	5.15	4.65	4.14	2.93	New [this study]			FMNH203783
	FMNH203785	Lophuromys cf. cinereus	aquilus										Yes	Yes	29.0141	-3.36878	Itombwe	CD	Itombwe_CD_FMNH203785	FMNH: 203785	2008	Male	Old adult	56.8	28.9	15.68	13.68	12.52	7.75	7.11	7.24	6.26	6.44	5.53	5.4	5.04	4.35	2.94	New [this study]			FMNH203785
	FMNH203795	Lophuromys cf. cinereus	aquilus	H_152	26	34	Yes								-3.33735	28.7558	Itombwe	CD	Itombwe_CD_FMNH203795																				New [this study]			FMNH203795
	FMNH203800	Lophuromys cf. cinereus	aquilus	H_152	26	34	Yes			Yes					-3.33735	28.7558	Itombwe	CD	Itombwe_CD_FMNH203800																				New [this study]			FMNH203800
	FMNH203801	Lophuromys cf. cinereus	aquilus	H_152	26	34	Yes								-2.88408	28.6588	Itombwe	CD	Itombwe_CD_FMNH203801																				New [this study]			FMNH203801
	FMNH204060	Lophuromys cf. cinereus	aquilus	H_146	26	34	Yes			Yes					-3.36878	29.0141	Itombwe	CD	Itombwe_CD_FMNH204060																				New [this study]			FMNH204060
	FMNH204067	Lophuromys cf. cinereus	aquilus										Yes	Yes	28.7558	-3.33735	Itombwe	CD	Itombwe_CD_FMNH204067	FMNH: 204067	2008	Female	Young adult	58.03	29.47	14.68	13	12.94	8.39	7.47	7.08	6.57	6.47	5.46	4.96	4.88	4.51	3.37	New [this study]			FMNH204067
	FMNH204069	Lophuromys cf. cinereus	aquilus										Yes	Yes	28.7558	-3.33735	Itombwe	CD	Itombwe_CD_FMNH204069	FMNH: 204069	2008	Female	Old adult	57.12	28.99	15.8	13.49	12.57	8.51	7.17	7.21	6.35	6.1	5.54	4.93	5.3	3.99	3.46	New [this study]			FMNH204069
	FMNH204078	Lophuromys cf. cinereus	aquilus										Yes	Yes	29.0141	-3.36878	Itombwe	CD	Itombwe_CD_FMNH204078	FMNH: 204078	2008	Female	Young adult	55.48	28.18	15.11	13.58	12.04	7.71	7.41	6.92	6.13	6.34	5.35	4.9	5.1	4	2.83	New [this study]			FMNH204078
	FMNH204081	Lophuromys cf. cinereus	aquilus										Yes	Yes	29.0141	-3.36878	Itombwe	CD	Itombwe_CD_FMNH204081	FMNH: 204081	2008	Female	Old adult	57.34	29.39	15.74	13.38	12.38	8.28	7.6	7.19	6.42	6.51	5.86	5.13	5.02	4.22	3.26	New [this study]			FMNH204081
	FMNH227217	Lophuromys cf. cinereus	aquilus										Yes	Yes	28.7407	-2.3245	Kahuzi	CD	KahuziBiega_CD_FMNH227217	FMNH: 227217	2007	Male	Old adult	56.13	28.25	15.75	13.18	11.93	8.24	7.1	6.84	6.93	6.43	5.54	4.74	4.94	3.74	3.14	New [this study]			FMNH227217
	FMNH227228	Lophuromys cf. cinereus	aquilus										Yes	Yes	28.6756	-2.25169	Kahuzi	CD	KahuziBiega_CD_FMNH227228	FMNH: 227228	2007	Female	Adult	54.56	27.76	15.23	13.36	11.5	8.31	7.06	6.72	6.3	6.18	5.39	4.58	4.78	4.1	2.74	New [this study]			FMNH227228
	FMNH227301	Lophuromys cf. cinereus	aquilus										Yes	Yes	28.7407	-2.3245	Kahuzi	CD	KahuziBiega_CD_FMNH227301	FMNH: 227301	2007	Male	Adult	57.06	29.15	15.08	13.12	12.41	8.38	7.52	6.86	6.6	6.2	5.4	4.91	4.96	4.27	2.88	New [this study]			FMNH227301
	FMNH227307	Lophuromys cf. cinereus	aquilus										Yes	Yes	28.6794	-2.25036	Kahuzi	CD	KahuziBiega_CD_FMNH227307	FMNH: 227307	2007	Female	Adult	56.87	28.97	15.54	13.44	12.14	8.22	7.4	6.86	7.01	6.47	5.46	5.05	5.32	4.05	2.9	New [this study]			FMNH227307
	FMNH227309	Lophuromys cf. cinereus	aquilus										Yes	Yes	28.6876	-2.25244	Kahuzi	CD	KahuziBiega_CD_FMNH227309	FMNH: 227309	2007	Female	Adult	54.28	27.72	15.21	13.08	12.11	7.79	7.31	7.14	5.84	6.48	5.57	4.96	4.7	4.15	2.63	New [this study]			FMNH227309
	FMNH227709	Lophuromys cf. cinereus	aquilus										Yes	Yes	28.8117	-2.23965	Centre	CD	Centre_CD_FMNH227709	FMNH: 227709	2014	Female	Adult	57.13	29.12	15.19	13.39	12.46	8.2	7.47	6.87	6.44	6.43	5.5	5.19	5.12	4.12	3.06	New [this study]			FMNH227709
	FMNH227712	Lophuromys cf. cinereus	aquilus	H_145	26	34	Yes	Yes	Yes		Yes	Yes	Yes	Yes	-2.27386	28.6651	MtKahuzi	CD	MtKahuzi_CD_FMNH227712	FMNH: 227712	2014	Male	Young adult	53.41	27.45	14.66	12.79	11.57	7.83	7.27	6.67	6.11	6.16	5.16	4.62	4.87	3.94	2.92	New [this study]			FMNH227712
	FMNH227716	Lophuromys cf. cinereus	aquilus				Yes	Yes					Yes		28.6651	-2.27386	MtKahuzi	CD	MtKahuzi_CD_FMNH227716	FMNH: 227716	2014	Female	Young adult		28.11	14.66	12.64	12.17	8.34	6.97	6.67	6.33	6	5.37	4.62	4.64	4.06	2.85	New [this study]			FMNH227716
	FMNH227720	Lophuromys cf. cinereus	aquilus				Yes	Yes					Yes	Yes	28.6651	-2.27386	MtKahuzi	CD	MtKahuzi_CD_FMNH227720	FMNH: 227720	2014	Female	Adult	56.55	28.79	15.89	13.6	11.89	8.21	7.36	7.01	6.78	6.66	5.23	5.27	5.06	3.89	2.87	New [this study]			FMNH227720
	FMNH227723	Lophuromys cf. cinereus	aquilus	H_149	26	34	Yes	Yes	Yes	Yes	Yes	Yes	Yes	Yes	-2.27386	28.6651	MtKahuzi	CD	MtKahuzi_CD_FMNH227723	FMNH: 227723	2014	Male	Young adult	55.53	28.46	15.41	13.15	11.87	8.31	7.25	6.7	6.48	6.26	5.6	4.72	4.83	3.96	2.91	New [this study]			FMNH227723
	FMNH227728	Lophuromys cf. cinereus	aquilus	H_150	26	34	Yes	Yes	Yes		Yes	Yes	Yes	Yes	-2.27386	28.6651	MtKahuzi	CD	MtKahuzi_CD_FMNH227728	FMNH: 227728	2014	Male	Young adult	56.45	28.66	16.04	13.63	12.43	8.07	7.57	6.89	6.37	6.45	5.59	4.84	5.39	4.11	2.78	New [this study]			FMNH227728
	FMNH227730	Lophuromys cf. cinereus	aquilus										Yes	Yes	28.6651	-2.27386	MtKahuzi	CD	MtKahuzi_CD_FMNH227730	FMNH: 227730	2014	Male	Young adult	54.34	28.1	14.33	12.87	12.18	7.84	7.07	6.38	6.54	7.09	5.75	4.69	4.74	4.21	2.9	New [this study]			FMNH227730
	FMNH227735	Lophuromys cf. cinereus	aquilus										Yes	Yes	28.6651	-2.27386	MtKahuzi	CD	MtKahuzi_CD_FMNH227735	FMNH: 227735	2014	Male	Adult	58.14	29.96	15.26	13.12	12.59	9.1	7.32	6.67	6.77	6.44	5.63	4.88	5.08	4.31	2.78	New [this study]			FMNH227735
	FMNH227737	Lophuromys cf. cinereus	aquilus										Yes	Yes	28.6741	-2.25746	Kahuzi	CD	KahuziBiega_CD_FMNH227737	FMNH: 227737	2014	Male	Young adult	54.38	27.81	15.15	12.63	11.78	7.85	7.26	6.73	6.76	6.2	5.33	4.82	4.74	3.55	2.81	New [this study]			FMNH227737
	FMNH227983	Lophuromys cf. cinereus	aquilus										Yes		28.8117	-2.23965	Centre	CD	Centre_CD_FMNH227983	FMNH: 227983	2014	Male	Young adult		28.93	14.79	13.23	12.71	8.22	7.17	6.81	6.8	6.19	5.23	4.56	4.74	3.41	2.76	New [this study]			FMNH227983
	FMNH228007	Lophuromys cf. cinereus	aquilus										Yes	Yes	28.6588	-2.88408	Itombwe	CD	Itombwe_CD_FMNH228007	FMNH: 228007	2010	Male	Young adult	57.34	29.34	14.61	12.97	12.62	8.38	7.34	7.07	6.24	6.66	5.36	4.84	5.11	4.18	3.07	New [this study]			FMNH228007
	FMNH228014	Lophuromys cf. cinereus	aquilus										Yes	Yes	28.6588	-2.88408	Itombwe	CD	Itombwe_CD_FMNH228014	FMNH: 228014	2010	Male	Young adult	54.1	27.48	14.63	12.91	11.67	7.64	7.4	6.96	5.88	5.97	5.22	4.9	4.96	3.96	3.13	New [this study]			FMNH228014
	FMNH228080	Lophuromys cf. cinereus	aquilus										Yes	Yes	28.6456	-2.88367	Itombwe	CD	Itombwe_CD_FMNH228080	FMNH: 228080	2010	Female	Young adult	51.04	26.21	13.71	12.48	11.07	6.98	6.72	6.59	5.8	6.04	5.15	5.19	4.56	3.58	2.46	New [this study]			FMNH228080
	FMNH228083	Lophuromys cf. cinereus	aquilus										Yes	Yes	28.6456	-2.88367	Itombwe	CD	Itombwe_CD_FMNH228083	FMNH: 228083	2010	Male	Old adult	56.73	28.8	15.26	13.42	12.16	8.37	7.31	7.43	6.45	6.25	5.36	4.76	5.2	3.84	2.73	New [this study]			FMNH228083
	CRT064	Lophuromys dudui	aquilus	H_198	27	9	Yes			Yes					0.5	24.16	Yaekela	CD	CRT064																				African Mammalia			CRT064
	CRT352	Lophuromys dudui	aquilus	H_198	27	9	Yes			Yes					1.16	23.44	Bomane	CD	CRT352																				GenBank	MN616977		CRT352
	CRT471	Lophuromys dudui	aquilus	H_198	27	9	Yes			Yes					1.16	23.44	Bomane	CD	CRT471																				GenBank	MN616979		CRT471
	DD9617	Lophuromys dudui	aquilus	H_207	31	9	Yes								0.5364	25.2176	Kisangani	CD	DD9617_Kisangani_CD																				African Mammalia			DD9617
	DD9628	Lophuromys dudui	aquilus	H_207	31	9	Yes								0.5364	25.2176	Kisangani	CD	Kisangani_CD_DD9628																				African Mammalia			DD9628
	FMNH149526	Lophuromys dudui	aquilus	H_196	28	9	Yes			Yes					1.57037	29.4145	Ituri	CD	Ituri_CD_FMNH149526																				New [this study]			FMNH149526
	FMNH149530	Lophuromys dudui	aquilus										Yes	Yes	28.5833	-1.4166	Epulu	CD	Epulu_CD_FMNH149530	FMNH: 149530	1991	Female	Adult	53.04	28.01	13.74	12.21	12.18	8.23	6.92	6.67	6.46	5.71	5.33	4.78	4.77	3.7	2.75	New [this study]			FMNH149530
	FMNH149536	Lophuromys dudui	aquilus	H_189	28	9	Yes	Yes	Yes	Yes	Yes	Yes	Yes	Yes	-1.4166	28.5833	Epulu	CD	Epulu_CD_FMNH149536	FMNH: 149536	1991	Male	Young adult	55.56	28.24	14.49	12.74	11.75	8.12	7.53	6.8	6.5	6.17	5.4	4.77	4.87	4.05	2.91	New [this study]			FMNH149536
	FMNH149538	Lophuromys dudui	aquilus										Yes	Yes	28.5833	-1.4166	Epulu	CD	Epulu_CD_FMNH149538	FMNH: 149538	1991	Male	Young adult	50.83	25.82	13.68	12.4	10.97	7.43	7.15	6.55	5.58	5.63	5.04	4.53	4.53	3.71	2.78	New [this study]			FMNH149538
	FMNH149539	Lophuromys dudui	aquilus										Yes	Yes	28.5833	-1.4166	Epulu	CD	Epulu_CD_FMNH149539	FMNH: 149539	1991	Female	Young adult	50.63	25.93	13.69	12.15	10.6	7.72	7.04	6.62	6.1	5.38	4.91	4.34	4.64	3.65	2.85	New [this study]			FMNH149539
	FMNH149540	Lophuromys dudui	aquilus										Yes	Yes	28.5833	-1.4166	Epulu	CD	Epulu_CD_FMNH149540	FMNH: 149540	1991	Male	Young adult	52.51	26.54	12.81	12.08	11.15	7.46	7.22	6.27	6.13	5.85	5.36	4.62	4.45	4.08	2.88	New [this study]			FMNH149540
	FMNH149541	Lophuromys dudui	aquilus	H_196	28	9	Yes	Yes		Yes	Yes		Yes	Yes	-1.4166	28.5833	Epulu	CD	Epulu_CD_FMNH149541	FMNH: 149541	1991	Female	Young adult	54.11	27.7	13.91	12.04	11.96	7.92	6.69	6.42	6.24	5.57	5.12	4.6	4.57	3.86	2.91	New [this study]			FMNH149541
	FMNH149545	Lophuromys dudui	aquilus										Yes	Yes	28.5833	-1.4166	Epulu	CD	Epulu_CD_FMNH149545	FMNH: 149545	1991	Male	Adult	54.83	27.93	14.83	12.74	12.04	8.14	7.06	6.84	6.19	5.81	4.96	4.6	4.99	3.79	2.86	New [this study]			FMNH149545
	FMNH188870	Lophuromys dudui	aquilus										Yes	Yes	29.4381	-0.10628	Tshiabirimu	CD	Tshiabirimu_CD_FMNH188870	FMNH: 188870	2004	Male	Young adult	54.57	27.65	14.65	13.23	11.39	7.94	7.22	6.75	6.74	5.94	5.35	5	4.77	3.91	2.77	New [this study]			FMNH188870
	FMNH188871	Lophuromys dudui	aquilus										Yes	Yes	29.4381	-0.10628	Tshiabirimu	CD	Tshiabirimu_CD_FMNH188871	FMNH: 188871	2004	Male	Adult	54.88	28.2	14.5	13.18	11.35	8.52	7.4	6.84	7.04	6.31	5.16	4.73	4.73	4.04	2.89	New [this study]			FMNH188871
	FMNH188872	Lophuromys dudui	aquilus										Yes	Yes	29.4405	-0.10442	Tshiabirimu	CD	Tshiabirimu_CD_FMNH188872	FMNH: 188872	2004	Male	Adult	54.27	27.45	14.77	13.34	11.51	7.99	7.25	6.82	6.78	6.22	5.54	4.8	4.83	3.74	2.99	New [this study]			FMNH188872
	FMNH188873	Lophuromys dudui	aquilus										Yes	Yes	29.4405	-0.10442	Tshiabirimu	CD	Tshiabirimu_CD_FMNH188873	FMNH: 188873	2004	Male	Old adult	55.13	28.26	14.43	12.75	12.31	8.37	7.07	6.63	6.31	6.19	5.3	4.68	4.83	3.99	2.95	New [this study]			FMNH188873
	FMNH188880	Lophuromys dudui	aquilus										Yes	Yes	29.4461	-0.12322	Tshiabirimu	CD	Tshiabirimu_CD_FMNH188880	FMNH: 188880	2004	Female	Adult	56.26	28.7	14.92	13.3	12.55	8.11	7.37	6.94	6.85	6.02	5.63	4.85	4.72	3.37	2.82	New [this study]			FMNH188880
	FMNH188882	Lophuromys dudui	aquilus										Yes	Yes	29.4461	-0.12322	Tshiabirimu	CD	Tshiabirimu_CD_FMNH188882	FMNH: 188882	2004	Male	Young adult	52.6	26.54	14.13	12.6	11.43	7.33	7.01	6.65	6.04	5.67	5.12	4.96	4.61	3.61	2.54	New [this study]			FMNH188882
	FMNH188889	Lophuromys dudui	aquilus										Yes	Yes	29.4387	-0.14052	Tshiabirimu	CD	Tshiabirimu_CD_FMNH188889	FMNH: 188889	2004	Male	Young adult	52.62	26.86	14.48	12.46	11.66	7.73	7.15	6.7	6.25	5.91	5.2	4.7	4.73	3.62	2.86	New [this study]			FMNH188889
	FMNH188899	Lophuromys dudui	aquilus										Yes	Yes	29.4387	-0.14052	Tshiabirimu	CD	Tshiabirimu_CD_FMNH188899	FMNH: 188899	2004	Male	Old adult	53.97	28.17	14.92	12.5	11.93	8.03	7	6.98	6.38	5.87	5.43	4.93	4.95	3.74	2.87	New [this study]			FMNH188899
	FMNH188906	Lophuromys dudui	aquilus										Yes	Yes	29.4387	-0.14052	Tshiabirimu	CD	Tshiabirimu_CD_FMNH188906	FMNH: 188906	2004	Male	Young adult	53.83	27.38	14.83	12.91	11.92	7.57	7.21	6.7	6.17	5.87	5.12	4.73	5.04	3.54	2.82	New [this study]			FMNH188906
	FMNH188910	Lophuromys dudui	aquilus										Yes	Yes	29.4387	-0.14052	Tshiabirimu	CD	Tshiabirimu_CD_FMNH188910	FMNH: 188910	2004	Female	Young adult	53.66	27.14	14.75	12.94	11.64	7.56	6.91	6.59	6.05	5.96	5.11	4.72	4.8	3.86	2.62	New [this study]			FMNH188910
	FMNH188915	Lophuromys dudui	aquilus										Yes	Yes	29.4387	-0.14052	Tshiabirimu	CD	Tshiabirimu_CD_FMNH188915	FMNH: 188915	2004	Female	Old adult	54.17	27.79	14.32	12.22	12.07	8.07	6.86	6.87	6.4	5.85	5.49	4.57	4.94	4.02	2.91	New [this study]			FMNH188915
	FMNH188924	Lophuromys dudui	aquilus										Yes	Yes	29.4387	-0.14052	Tshiabirimu	CD	Tshiabirimu_CD_FMNH188924	FMNH: 188924	2004	Male	Adult	55.81	28.49	15.2	13.1	12.18	7.95	6.94	6.73	6.38	6.05	5.37	5.12	4.87	3.88	2.87	New [this study]			FMNH188924
	FMNH188927	Lophuromys dudui	aquilus										Yes	Yes	29.4387	-0.14052	Tshiabirimu	CD	Tshiabirimu_CD_FMNH188927	FMNH: 188927	2004	Female	Old adult	51.47	26.25	14.59	12.91	10.95	7.48	6.85	7.21	6.06	6.28	5.09	5.01	4.82	3.46	2.83	New [this study]			FMNH188927
	FMNH188929	Lophuromys dudui	aquilus										Yes	Yes	29.4387	-0.14052	Tshiabirimu	CD	Tshiabirimu_CD_FMNH188929	FMNH: 188929	2004	Male	Old adult	52.39	26.48	14.97	13.31	11.27	7.16	7.09	7.11	6.31	6.18	4.88	5.17	4.92	3.32	2.7	New [this study]			FMNH188929
	FMNH188931	Lophuromys dudui	aquilus										Yes	Yes	29.4387	-0.14052	Tshiabirimu	CD	Tshiabirimu_CD_FMNH188931	FMNH: 188931	2004	Female	Young adult	53	27.16	14.08	12.48	11.69	7.49	6.7	6.69	5.85	6.03	5.38	4.92	4.67	3.91	2.86	New [this study]			FMNH188931
	FMNH188936	Lophuromys dudui	aquilus										Yes	Yes	29.4387	-0.14052	Tshiabirimu	CD	Tshiabirimu_CD_FMNH188936	FMNH: 188936	2004	Female	Old adult	56.05	28.33	15.18	13.25	12.1	8.34	7.18	7.06	6.57	6.14	5.78	4.6	5.09	3.74	3.01	New [this study]			FMNH188936
	FMNH29866	Lophuromys dudui	aquilus										Yes	Yes	29.8443	1.43499	Irumu	CD	Irumu_CD_FMNH29866	FMNH: 29866	1924	Male	Old adult	52.64	26.94	14.2	12.13	11.84	7.73	6.71	6.31	6.26	5.8	5.25	4.5	4.39	3.64	2.79	New [this study]			FMNH29866
	FMNH29868	Lophuromys dudui	aquilus										Yes	Yes	29.8443	1.43499	Irumu	CD	Irumu_CD_FMNH29868	FMNH: 29868	1924	Female	Adult	50.84	25.88	14.2	12.1	10.85	7.56	6.79	6.7	5.87	5.56	4.86	4.27	4.53	3.89	2.84	New [this study]			FMNH29868
	FMNH29869	Lophuromys dudui	aquilus										Yes	Yes	29.8443	1.43499	Irumu	CD	Irumu_CD_FMNH29869	FMNH: 29869	1924	Male	Young adult	50.81	26.16	13.42	12.08	11.31	7.47	6.8	6.15	5.84	5.36	4.85	4.42	4.58	3.64	2.66	New [this study]			FMNH29869
	FMNH29870	Lophuromys dudui	aquilus										Yes	Yes	29.8443	1.43499	Irumu	CD	Irumu_CD_FMNH29870	FMNH: 29870	1924	Female	Young adult	51.05	26.2	13.06	11.85	11.02	7.72	6.83	6.24	6.11	5.68	4.99	4.56	4.5	3.87	2.62	New [this study]			FMNH29870
	FMNH29871	Lophuromys dudui	aquilus										Yes	Yes	29.8443	1.43499	Irumu	CD	Irumu_CD_FMNH29871	FMNH: 29871	1924	Female	Adult	51.8	26.68	14.22	11.87	11.34	7.57	6.63	6.46	6.3	5.81	4.91	4.74	4.76	3.8	2.75	New [this study]			FMNH29871
	FMNH29872	Lophuromys dudui	aquilus										Yes	Yes	29.8443	1.43499	Irumu	CD	Irumu_CD_FMNH29872	FMNH: 29872	1924	Male	Adult	51.84	26.55	13.34	12.37	11.02	7.63	6.64	6.19	6.07	5.56	4.86	4.55	4.36	3.73	2.52	New [this study]			FMNH29872
	Hap127	Lophuromys dudui	aquilus	H_188	32	42	Yes											MZ	CXXVII																				African Mammalia			Hap127
	Hap128	Lophuromys dudui	aquilus	H_189	32	42	Yes											MZ	CXXVIII																				African Mammalia			Hap128
	Hap129	Lophuromys dudui	aquilus	H_186	32	42	Yes								-0.3019	20.8769	Baliko	CD	CXXIX																				African Mammalia			Hap129
	Hap130	Lophuromys dudui	aquilus	H_198	27	9	Yes								1.16	23.44	Bomane	CD	CXXX																				African Mammalia			Hap130
	Hap131	Lophuromys dudui	aquilus	H_207	31	9	Yes			Yes					0.02267	25.0188	Masako	CD	CXXXI																				African Mammalia			Hap131
	Hap132	Lophuromys dudui	aquilus	H_198	27	9	Yes								0.02267	25.0188	Masako	CD	CXXXII																				African Mammalia			Hap132
	Hap133	Lophuromys dudui	aquilus	H_198	27	9	Yes								1.16	23.44	Bomane	CD	CXXXIII																				African Mammalia			Hap133
	Hap134	Lophuromys dudui	aquilus	H_187	32	42	Yes			Yes					0.02267	25.0188	Masako	CD	CXXXIV																				African Mammalia			Hap134
	Hap136	Lophuromys dudui	aquilus	H_207	31	9	Yes								0.5364	25.2176	Kisangani	CD	CXXXVI																				African Mammalia			Hap136
	Hap139	Lophuromys dudui	aquilus	H_207	31	9	Yes			Yes					0.02267	25.0188	Masako	CD	CXXXIX																				African Mammalia			Hap139
	Hap140	Lophuromys dudui	aquilus	H_197	27	9	Yes			Yes					0.7969	24.4401	Yangambi	CD	CXL																				African Mammalia			Hap140
	Hap141	Lophuromys dudui	aquilus	H_198	27	9	Yes			Yes					0.7969	24.4401	Yangambi	CD	CXLI																				African Mammalia			Hap141
	Hap142	Lophuromys dudui	aquilus	H_198	27	9	Yes								0.7969	24.4401	Yangambi	CD	CXLII																				African Mammalia			Hap142
	Hap143	Lophuromys dudui	aquilus	H_198	27	9	Yes								0.7969	24.4401	Yangambi	CD	CXLIII																				African Mammalia			Hap143
	LIK135	Lophuromys dudui	aquilus	H_199	27	9	Yes												LIK135																				GenBank	MN597558		LIK135
	LIK181	Lophuromys dudui	aquilus	H_201	27	9	Yes												LIK181																				GenBank	MN597585		LIK181
	LIK20	Lophuromys dudui	aquilus	H_200	27	9	Yes												LIK20																				GenBank	MN597473		LIK20
	LIK218	Lophuromys dudui	aquilus	H_202	27	9	Yes												LIK218																				GenBank	MN597616		LIK218
	LIK246	Lophuromys dudui	aquilus	H_201	27	9	Yes												LIK246																				GenBank	MN597643		LIK246
	LIK272	Lophuromys dudui	aquilus	H_199	27	9	Yes												LIK272																				GenBank	MN597662		LIK272
	LIK284	Lophuromys dudui	aquilus	H_190	29	9	Yes			Yes									LIK284																				GenBank	MN597672		LIK284
	LIK293	Lophuromys dudui	aquilus	H_202	27	9	Yes												LIK293																				GenBank	MN597681		LIK293
	LIK301	Lophuromys dudui	aquilus	H_190	29	9	Yes												LIK301																				GenBank	MN597688		LIK301
	LIK306	Lophuromys dudui	aquilus	H_201	27	9	Yes												LIK306																				GenBank	MN597692		LIK306
	LIK315	Lophuromys dudui	aquilus	H_201	27	9	Yes												LIK315																				GenBank	MN597701		LIK315
	LIK96	Lophuromys dudui	aquilus	H_201	27	9	Yes												LIK96																				GenBank	MN597528		LIK96
	N27745	Lophuromys dudui	aquilus	H_198	27	9	Yes			Yes									N27745																				African Mammalia			N27745
	PK301	Lophuromys dudui	aquilus	H_204	30	9	Yes			Yes					-0.14052	29.4387	Tshiabirimu	CD	Tshiabirimu_CD_PK301																				African Mammalia			PK301
	PK341	Lophuromys dudui	aquilus	H_205	30	9	Yes			Yes					-0.14052	29.4387	Tshiabirimu	CD	Tshiabirimu_CD_PK341																				African Mammalia			PK341
	PK360	Lophuromys dudui	aquilus	H_205	30	9	Yes								-0.14052	29.4387	Tshiabirimu	CD	Tshiabirimu_CD_PK360																				African Mammalia			PK360
	PK418	Lophuromys dudui	aquilus	H_204	30	9	Yes								-0.14052	29.4387	Tshiabirimu	CD	Tshiabirimu_CD_PK418																				African Mammalia			PK418
	PK449	Lophuromys dudui	aquilus	H_203	30	9	Yes			Yes					-0.14052	29.4387	Tshiabirimu	CD	Tshiabirimu_CD_PK449																				African Mammalia			PK449
	R26112	Lophuromys dudui	aquilus	H_207	31	9	Yes								0.5364	25.2176	Kisangani	CD	Kisangani_CD_R26112																				African Mammalia			R26112
	Z2556	Lophuromys dudui	aquilus	H_206	31	9	Yes			Yes					0.28	25.33	Tshakala	CD	Z2556																				African Mammalia			Z2556
	FMNH147292	Lophuromys kilonzoi	aquilus										Yes	Yes	38.4167	-5.06667	WUsambara	TZ	WUsambara_TZ_FMNH147292	FMNH: 147292	1991	Male	Adult	55.54	28.47	15.11	12.57	12.21	8.12	7.34	6.88	6.36	6.25	5.22	4.91	5.04	3.98	2.94	New [this study]			FMNH147292
	FMNH147293	Lophuromys kilonzoi	aquilus				Yes	Yes					Yes		38.4167	-5.06667	WUsambara	TZ	WUsambara_TZ_FMNH147293	FMNH: 147293	1991	Male	Young adult		28.05	14.29	12.98	11.65	7.5	7.64	6.89	6.26	6.39	5.38	5.35	4.84	3.94	3.01	New [this study]			FMNH147293
	FMNH147294	Lophuromys kilonzoi	aquilus										Yes	Yes	38.4167	-5.06667	WUsambara	TZ	WUsambara_TZ_FMNH147294	FMNH: 147294	1991	Male	Adult	55.36	28	14.33	12.72	12.12	7.71	7.02	6.65	6.15	6.21	5.12	5.03	4.82	4.11	3.03	New [this study]			FMNH147294
	FMNH147298	Lophuromys kilonzoi	aquilus										Yes	Yes	38.4167	-5.06667	WUsambara	TZ	WUsambara_TZ_FMNH147298	FMNH: 147298	1991	Female	Young adult	53.86	27.12	14.04	12.83	10.99	7.61	7.43	6.54	6.17	6.11	5.35	4.99	4.74	4.27	2.73	New [this study]			FMNH147298
	FMNH147299	Lophuromys kilonzoi	aquilus										Yes	Yes	38.4333	-5.06667	WUsambara	TZ	WUsambara_TZ_FMNH147299	FMNH: 147299	1991	Male	Young adult	55.04	28.16	14.39	12.61	11.47	7.9	7.24	6.55	6.31	5.93	5.31	5	5.13	4.08	2.83	New [this study]			FMNH147299
	FMNH147301	Lophuromys kilonzoi	aquilus	H_53	52	29	Yes	Yes	Yes	Yes	Yes	Yes	Yes	Yes	-5.06667	38.4333	Usambara	TZ	WUsambara_TZ_FMNH147301	FMNH: 147301	1991	Female	Old adult	60.03	30.67	16.25	13.5	12.9	8.6	7.47	7.05	6.89	6.28	5.5	5.13	5.25	4.16	3.24	New [this study]			FMNH147301
	FMNH147302	Lophuromys kilonzoi	aquilus	H_53	52	29	Yes	Yes	Yes		Yes	Yes	Yes	Yes	-5.06667	38.4333	Usambara	TZ	WUsambara_TZ_FMNH147302	FMNH: 147302	1991	Male	Adult	60.06	30.53	15.99	12.98	13.02	8.49	7.34	7.24	6.79	6.51	5.41	5.27	5.34	4.18	3.27	New [this study]			FMNH147302
	FMNH147303	Lophuromys kilonzoi	aquilus										Yes	Yes	38.6167	-5.06667	EUsambara	TZ	EUsambara_TZ_FMNH147303	FMNH: 147303	1991	Female	Old adult	60.09	30	16.06	13.08	13.09	8.5	7.72	7.45	6.39	6.74	5.47	5.08	5.52	4.6	3.3	New [this study]			FMNH147303
	FMNH150172	Lophuromys kilonzoi	aquilus										Yes		38.6	-5.06667	EUsambara	TZ	EUsambara_TZ_FMNH150172	FMNH: 150172	1992	Female	Young adult		27.75	14.56	12.82	11.66	7.74	7.24	6.86	6.16	6.27	5.37	4.79	4.99	4.05	2.98	New [this study]			FMNH150172
	FMNH150174	Lophuromys kilonzoi	aquilus										Yes		38.6	-5.06667	EUsambara	TZ	EUsambara_TZ_FMNH150174	FMNH: 150174	1992	Female	Adult		29.12	15.86	12.91	12.71	8.46	7.03	7.05	6.25	6.62	5.56	4.84	5.12	4.4	3.25	New [this study]			FMNH150174
	FMNH150177	Lophuromys kilonzoi	aquilus										Yes	Yes	38.6	-5.06667	EUsambara	TZ	EUsambara_TZ_FMNH150177	FMNH: 150177	1992	Female	Adult	57.95	29.29	15.36	13.08	12.65	8.32	7.05	6.85	6.6	6.22	5.58	4.79	4.97	4.16	3.01	New [this study]			FMNH150177
	FMNH150179	Lophuromys kilonzoi	aquilus										Yes	Yes	38.6	-5.06667	EUsambara	TZ	EUsambara_TZ_FMNH150179	FMNH: 150179	1992	Male	Young adult	55.4	28.08	14.14	13.02	11.61	7.88	7.47	6.59	6.17	6.33	5.47	4.91	4.77	4.42	3.02	New [this study]			FMNH150179
	FMNH150180	Lophuromys kilonzoi	aquilus	H_55	52	29	Yes		Yes			Yes	Yes	Yes	-5.06667	38.6	Usambara	TZ	EUsambara_TZ_FMNH150180	FMNH: 150180	1992	Male	Adult	58.52	29.68	15.45	13.09	12.58	8.41	7.65	7.07	6.57	6.83	5.45	4.93	4.97	4.43	3.37	New [this study]			FMNH150180
	FMNH150181	Lophuromys kilonzoi	aquilus										Yes	Yes	38.6	-5.06667	EUsambara	TZ	EUsambara_TZ_FMNH150181	FMNH: 150181	1992	Female	Old adult	60.25	30.78	15.98	13.24	12.98	9.32	7.83	7.43	6.67	6.89	5.48	4.99	5.41	4.67	3.42	New [this study]			FMNH150181
	FMNH150188	Lophuromys kilonzoi	aquilus										Yes	Yes	38.6	-5.1	EUsambara	TZ	EUsambara_TZ_FMNH150188	FMNH: 150188	1992	Male	Old adult	59.68	30.5	16.18	13.33	12.96	8.98	7.4	7.12	6.47	6.87	5.78	4.93	5.4	4.71	3.28	New [this study]			FMNH150188
	FMNH150189	Lophuromys kilonzoi	aquilus										Yes	Yes	38.6	-5.1	EUsambara	TZ	EUsambara_TZ_FMNH150189	FMNH: 150189	1992	Female	Adult	60.16	30.42	15.78	13.48	13.27	8.8	7.74	6.85	6.69	6.98	5.78	4.88	5.3	4.35	2.98	New [this study]			FMNH150189
	FMNH150192	Lophuromys kilonzoi	aquilus										Yes	Yes	38.6167	-5.03333	EUsambara	TZ	EUsambara_TZ_FMNH150192	FMNH: 150192	1992	Female	Young adult	57.06	28.96	15.66	13.62	12.3	7.97	7.35	7.24	6.53	6.65	5.18	5.13	4.99	4.12	3.21	New [this study]			FMNH150192
	FMNH150193	Lophuromys kilonzoi	aquilus				Yes	Yes	Yes				Yes	Yes	38.6167	-5.03333	EUsambara	TZ	EUsambara_TZ_FMNH150193	FMNH: 150193	1992	Female	Adult	59.58	30.18	15.92	13.05	12.73	8.43	7.49	7.34	6.24	6.65	5.4	5.21	5.52	4.48	3.45	New [this study]			FMNH150193
	FMNH150197	Lophuromys kilonzoi	aquilus										Yes	Yes	38.6	-5.1	EUsambara	TZ	EUsambara_TZ_FMNH150197	FMNH: 150197	1992	Female	Old adult	57.8	29.23	16.16	13.23	12.28	8.89	7.13	7.29	6.48	6.45	5.3	4.7	5.39	4.34	3.39	New [this study]			FMNH150197
	FMNH150200	Lophuromys kilonzoi	aquilus	H_53	52	29	Yes	Yes		Yes	Yes		Yes	Yes	-5.1	38.6	Usambara	TZ	EUsambara_TZ_FMNH150200	FMNH: 150200	1992	Male	Adult	52.45	26.96	14.55	12.58	11.09	7.92	6.84	6.72	6.13	6.09	5.02	4.61	4.63	3.82	3.06	New [this study]			FMNH150200
	FMNH150203	Lophuromys kilonzoi	aquilus	H_53	52	29	Yes	Yes	Yes		Yes	Yes	Yes	Yes	-5.06667	38.4167	Usambara	TZ	WUsambara_TZ_FMNH150203	FMNH: 150203	1992	Female	Adult	57.68	29.54	15.43	13.18	12.7	8.3	7.11	6.94	6.56	6.4	5.43	4.98	5	3.8	3.14	New [this study]			FMNH150203
	FMNH150204	Lophuromys kilonzoi	aquilus										Yes	Yes	38.4167	-5.06667	WUsambara	TZ	WUsambara_TZ_FMNH150204	FMNH: 150204	1992	Male	Adult	56.14	28.53	15.25	12.55	12.49	8	6.81	6.75	6.33	6.09	5.15	4.97	4.73	4.11	3.01	New [this study]			FMNH150204
	FMNH150206	Lophuromys kilonzoi	aquilus										Yes	Yes	38.6	-5.06667	EUsambara	TZ	EUsambara_TZ_FMNH150206	FMNH: 150206	1992	Male	Adult	57.78	29.71	15.59	12.84	12.82	8.51	7.57	6.89	6.28	6.5	5.41	4.67	4.89	4.33	3.35	New [this study]			FMNH150206
	FMNH150207	Lophuromys kilonzoi	aquilus										Yes	Yes	38.6	-5.06667	EUsambara	TZ	EUsambara_TZ_FMNH150207	FMNH: 150207	1992	Female	Old adult	58.87	29.69	15.87	13.29	12.84	8.6	6.96	7.12	6.5	6.58	5.57	4.57	5.01	4.35	3.26	New [this study]			FMNH150207
	FMNH150208	Lophuromys kilonzoi	aquilus				Yes						Yes	Yes	38.6	-5.06667	EUsambara	TZ	EUsambara_TZ_FMNH150208	FMNH: 150208	1992	Male	Old adult	58.73	29.88	15.64	13.09	12.58	8.57	7.39	7.19	6.85	6.55	5.45	4.81	5.18	4.38	3.39	New [this study]			FMNH150208
	FMNH150213	Lophuromys kilonzoi	aquilus										Yes	Yes	38.6167	-5.03333	EUsambara	TZ	EUsambara_TZ_FMNH150213	FMNH: 150213	1992	Female	Young adult	54.77	27.61	14.7	13.07	11.51	7.81	7.13	6.73	5.73	6.17	5.16	4.59	4.91	4.19	2.75	New [this study]			FMNH150213
	FMNH150214	Lophuromys kilonzoi	aquilus										Yes	Yes	38.4167	-5.06667	WUsambara	TZ	WUsambara_TZ_FMNH150214	FMNH: 150214	1992	Female	Young adult	55.23	28.24	14.31	12.79	11.55	7.85	7.39	6.82	6.49	6.46	5.32	5.24	5.08	3.99	3.24	New [this study]			FMNH150214
	FMNH150215	Lophuromys kilonzoi	aquilus										Yes	Yes	38.4167	-5.06667	WUsambara	TZ	WUsambara_TZ_FMNH150215	FMNH: 150215	1992	Male	Old adult	58.37	29.45	15.54	13.06	12.92	8.4	7.47	6.91	6.96	6.58	5.56	5.16	5.09	3.98	3.4	New [this study]			FMNH150215
	FMNH151259	Lophuromys kilonzoi	aquilus										Yes		38.6	-5.1	EUsambara	TZ	EUsambara_TZ_FMNH151259	FMNH: 151259	1993	Female	Adult		29.7	15.41	13.04	12.9	8.92	7.02	7.09	6.45	6.56	5.31	4.49	5.11	4.24	3.24	New [this study]			FMNH151259
	FMNH151261	Lophuromys kilonzoi	aquilus	H_55	52	29	Yes	Yes	Yes		Yes	Yes	Yes	Yes	-5.1	38.6	Usambara	TZ	EUsambara_TZ_FMNH151261	FMNH: 151261	1993	Male	Old adult	59.85	30.12	16.34	13.36	12.88	8.81	7.54	7.32	7.01	6.31	5.48	4.39	5.18	4.23	3.27	New [this study]			FMNH151261
	FMNH153953	Lophuromys kilonzoi	aquilus										Yes	Yes	37.9278	-4.28333	SPare	TZ	SPare_TZ_FMNH153953	FMNH: 153953	1994	Female	Old adult	57.17	28.84	15.24	13.33	12.07	8.17	7.38	7.11	5.63	6.32	5.59	5.07	4.72	4.86	2.99	New [this study]			FMNH153953
	FMNH153954	Lophuromys kilonzoi	aquilus	H_53	52	29	Yes	Yes	Yes	Yes	Yes	Yes	Yes	Yes	-4.28333	37.9278	SPare	TZ	SPare_TZ_FMNH153954	FMNH: 153954	1994	Male	Old adult	58.91	30.04	15.53	13.45	13.26	8.4	7.41	7.3	6.3	6.37	5.62	5.11	4.94	4.3	3.08	New [this study]			FMNH153954
	FMNH153955	Lophuromys kilonzoi	aquilus										Yes	Yes	37.9278	-4.28333	SPare	TZ	SPare_TZ_FMNH153955	FMNH: 153955	1994	Male	Old adult	58.75	29.77	15.32	13.22	12.65	8.56	7.17	7.14	5.93	6.16	5.66	5.02	5.23	5.05	3.21	New [this study]			FMNH153955
	FMNH158356	Lophuromys kilonzoi	aquilus				Yes	Yes	Yes				Yes	Yes	37.7056	-6.92917	Uluguru	TZ	Uluguru_TZ_FMNH158356	FMNH: 158356	1996	Male	Adult	53.64	27.37	14.26	12.6	11.85	7.73	6.98	6.76	5.8	6.07	5.07	4.62	4.81	4.06	2.77	New [this study]			FMNH158356
	FMNH158357	Lophuromys kilonzoi	aquilus	H_52	53	29	Yes	Yes		Yes	Yes		Yes		-6.92917	37.7056	Uluguru	TZ	Uluguru_TZ_FMNH158357	FMNH: 158357	1996	Female	Adult		28.98	15.58	13.52	11.43	8.48	7.17	7.02	6.66	6.4	5.57	4.94	5.12	4.69	3.33	New [this study]			FMNH158357
	FMNH158359	Lophuromys kilonzoi	aquilus	H_51	53	29	Yes	Yes	Yes		Yes	Yes	Yes	Yes	-6.92	37.6833	Uluguru	TZ	Uluguru_TZ_FMNH158359	FMNH: 158359	1996	Male	Adult	54.14	27.56	14.09	12.35	11.44	7.81	6.71	6.52	6.35	5.96	5.04	5.06	4.58	3.99	2.84	New [this study]			FMNH158359
	FMNH158360	Lophuromys kilonzoi	aquilus	H_51	53	29	Yes	Yes	Yes		Yes	Yes	Yes		-6.92	37.6833	Uluguru	TZ	Uluguru_TZ_FMNH158360	FMNH: 158360	1996	Male	Old adult		28.66	14.69	12.74	11.94	8.24	7.04	6.92	6.92	6.4	5.24	4.94	4.95	4.2	3.08	New [this study]			FMNH158360
	FMNH158362	Lophuromys kilonzoi	aquilus				Yes	Yes					Yes	Yes	37.7056	-6.92917	Uluguru	TZ	Uluguru_TZ_FMNH158362	FMNH: 158362	1996	Male	Adult	54.75	27.91	14.59	12.66	11.88	8.19	7.13	6.64	6.81	6.19	5.07	4.84	4.94	3.68	2.93	New [this study]			FMNH158362
	FMNH158516	Lophuromys kilonzoi	aquilus										Yes	Yes	37.6833	-6.92	Uluguru	TZ	Uluguru_TZ_FMNH158516	FMNH: 158516	1996	Female	Old adult	57.93	29.69	15.4	13.25	12.86	8.49	7.82	7.14	6.61	6.36	5.46	5.13	5.22	3.85	3.53	New [this study]			FMNH158516
	FMNH158517	Lophuromys kilonzoi	aquilus										Yes	Yes	37.6833	-6.92	Uluguru	TZ	Uluguru_TZ_FMNH158517	FMNH: 158517	1996	Male	Adult	54.39	27.66	14.54	12.98	11.63	7.72	6.92	6.63	6.64	6.39	5.08	4.88	4.83	3.78	2.98	New [this study]			FMNH158517
	FMNH158518	Lophuromys kilonzoi	aquilus										Yes	Yes	37.6833	-6.92	Uluguru	TZ	Uluguru_TZ_FMNH158518	FMNH: 158518	1996	Female	Adult	54.23	27.75	14.69	12.54	11.54	7.93	6.94	6.72	6.43	6.08	5.23	4.83	4.65	3.81	2.94	New [this study]			FMNH158518
	FMNH158519	Lophuromys kilonzoi	aquilus										Yes	Yes	37.6833	-6.92	Uluguru	TZ	Uluguru_TZ_FMNH158519	FMNH: 158519	1996	Female	Adult	54.44	27.88	15.35	12.78	11.87	7.72	7.26	6.68	6.12	5.81	5.1	4.8	4.73	4	3.06	New [this study]			FMNH158519
	FMNH158520	Lophuromys kilonzoi	aquilus										Yes	Yes	37.6833	-6.92	Uluguru	TZ	Uluguru_TZ_FMNH158520	FMNH: 158520	1996	Female	Adult	54.85	27.83	14.83	12.55	11.79	7.93	6.99	6.77	6.66	6.27	5.2	4.89	4.93	3.58	2.97	New [this study]			FMNH158520
	FMNH161273	Lophuromys kilonzoi	aquilus	H_53	52	29	Yes	Yes	Yes	Yes	Yes	Yes	Yes	Yes	-6.04722	37.5472	Nguru	TZ	Nguru_TZ_FMNH161273	FMNH: 161273	1997	Female	Old adult	55.79	28.59	14.97	12.98	12.3	8.26	7.27	7.06	6.46	6.11	5.26	5.08	4.96	4.14	2.93	New [this study]			FMNH161273
	FMNH161274	Lophuromys kilonzoi	aquilus				Yes	Yes					Yes	Yes	37.5472	-6.04722	Nguru	TZ	Nguru_TZ_FMNH161274	FMNH: 161274	1997	Male	Adult	56.03	28.7	14.5	12.88	12.33	8.19	7.55	6.91	6.69	6.22	5.34	5.02	4.81	3.87	2.95	New [this study]			FMNH161274
	FMNH161276	Lophuromys kilonzoi	aquilus	H_53	52	29	Yes	Yes	Yes		Yes	Yes	Yes	Yes	-6.06389	37.5236	Nguru	TZ	Nguru_TZ_FMNH161276	FMNH: 161276	1997	Female	Old adult	57.09	28.99	15.42	13.53	12.37	8.16	7.51	7.19	6.72	6.43	5.45	5.32	4.98	4.03	3.19	New [this study]			FMNH161276
	FMNH161278	Lophuromys kilonzoi	aquilus										Yes	Yes	37.5236	-6.06389	Nguru	TZ	Nguru_TZ_FMNH161278	FMNH: 161278	1997	Female	Old adult	58.71	29.8	15.3	12.91	12.86	8.47	7.74	7.27	6.68	6.58	5.76	5.2	5.18	4.09	3.23	New [this study]			FMNH161278
	FMNH161280	Lophuromys kilonzoi	aquilus										Yes	Yes	37.5236	-6.06389	Nguru	TZ	Nguru_TZ_FMNH161280	FMNH: 161280	1997	Male	Old adult	57.56	29.12	15.24	13.27	12.71	8.41	7.28	7.03	6.48	6.27	5.28	4.95	5.01	4.24	3.26	New [this study]			FMNH161280
	FMNH166661	Lophuromys kilonzoi	aquilus										Yes	Yes	36.9361	-6.37917	Ukaguru	TZ	Ukaguru_TZ_FMNH166661	FMNH: 166661	1999	Male	Adult	55.21	27.71	14.93	13.14	11.61	7.75	7.36	6.9	6.42	6.21	5.69	4.88	5.06	3.84	3.03	New [this study]			FMNH166661
	FMNH166926	Lophuromys kilonzoi	aquilus	H_53	52	29	Yes	Yes	Yes		Yes	Yes	Yes	Yes	-6.37917	36.9361	Ukaguru	TZ	Ukaguru_TZ_FMNH166926	FMNH: 166926	1999	Female	Adult	57.03	28.81	15.74	13.33	12.49	7.85	7.68	7.2	6.35	6.41	5.61	5.08	5.05	4.14	3.11	New [this study]			FMNH166926
	FMNH166929	Lophuromys kilonzoi	aquilus	H_53	52	29	Yes	Yes	Yes	Yes	Yes	Yes	Yes	Yes	-6.37917	36.9361	Ukaguru	TZ	Ukaguru_TZ_FMNH166929	FMNH: 166929	1999	Male	Adult	57.02	29.12	15.49	12.68	12.32	8.35	7.24	7.04	6.83	6.21	5.32	4.94	5.11	4.09	2.99	New [this study]			FMNH166929
	FMNH166930	Lophuromys kilonzoi	aquilus				Yes	Yes	Yes				Yes	Yes	36.9361	-6.37917	Ukaguru	TZ	Ukaguru_TZ_FMNH166930	FMNH: 166930	1999	Male	Old adult	59.12	29.9	15.47	12.8	12.97	8.46	7.92	7.2	6.69	6.42	5.46	5	5.02	4.37	3.28	New [this study]			FMNH166930
	FMNH166931	Lophuromys kilonzoi	aquilus	H_53	52	29	Yes	Yes	Yes		Yes	Yes	Yes	Yes	-6.37917	36.9361	Ukaguru	TZ	Ukaguru_TZ_FMNH166931	FMNH: 166931	1999	Male	Adult	57.99	29.38	15.16	12.49	12.96	8.4	7.74	6.98	6.7	6.19	5.62	4.78	4.95	3.73	3.1	New [this study]			FMNH166931
	FMNH168193	Lophuromys kilonzoi	aquilus	H_53	52	29	Yes	Yes	Yes		Yes	Yes	Yes	Yes	-5.46944	37.4819	Nguru	TZ	Nguru_TZ_FMNH168193	FMNH: 168193	2000	Female	Adult	55.27	28.42	14.64	12.6	11.77	8	7.11	6.95	6.51	6.02	5	4.82	4.83	3.9	3.11	New [this study]			FMNH168193
	FMNH168333	Lophuromys kilonzoi	aquilus	H_54	52	29	Yes	Yes	Yes		Yes	Yes	Yes	Yes	-5.47778	37.475	Nguru	TZ	Nguru_TZ_FMNH168333	FMNH: 168333	2000	Female	Young adult	54.54	27.72	15.07	12.71	11.52	7.82	7.19	6.63	6.18	6.01	5.24	4.96	4.71	4.25	3.02	New [this study]			FMNH168333
	FMNH168334	Lophuromys kilonzoi	aquilus										Yes	Yes	37.475	-5.47778	Nguru	TZ	Nguru_TZ_FMNH168334	FMNH: 168334	2000	Female	Old adult	56.62	29.08	15.26	12.72	12.07	8.5	7.14	7.15	6.74	6.23	5.25	4.98	5.02	4.22	3.31	New [this study]			FMNH168334
	FMNH168335	Lophuromys kilonzoi	aquilus										Yes	Yes	37.475	-5.47778	Nguru	TZ	Nguru_TZ_FMNH168335	FMNH: 168335	2000	Male	Young adult	57.14	28.95	15.28	13.29	12.48	8.16	7.45	6.85	6.66	6.33	5.29	4.87	4.85	4.07	3.21	New [this study]			FMNH168335
	FMNH168341	Lophuromys kilonzoi	aquilus										Yes	Yes	37.4819	-5.46944	Nguru	TZ	Nguru_TZ_FMNH168341	FMNH: 168341	2000	Male	Young adult	56.48	28.75	14.85	12.86	12.06	8.1	7.44	6.94	6.12	6.26	5.34	5.11	4.96	4.52	2.99	New [this study]			FMNH168341
	FMNH168343	Lophuromys kilonzoi	aquilus										Yes	Yes	37.4819	-5.46944	Nguru	TZ	Nguru_TZ_FMNH168343	FMNH: 168343	2000	Female	Young adult	53.34	26.94	13.76	12.3	11.41	7.47	7.24	6.61	5.63	6.11	5.08	4.79	4.72	4.32	2.75	New [this study]			FMNH168343
	FMNH168345	Lophuromys kilonzoi	aquilus										Yes	Yes	37.4819	-5.46944	Nguru	TZ	Nguru_TZ_FMNH168345	FMNH: 168345	2000	Female	Young adult	55.59	28.19	15.17	12.92	12.24	7.67	7.52	7.2	6.13	6.35	5.24	5.14	5.01	4.17	3.08	New [this study]			FMNH168345
	FMNH168347	Lophuromys kilonzoi	aquilus										Yes	Yes	37.4819	-5.46944	Nguru	TZ	Nguru_TZ_FMNH168347	FMNH: 168347	2000	Male	Adult	55.82	28.42	14.76	12.92	11.95	7.98	7.6	6.9	6.12	6.33	5.02	4.95	5.09	4.28	2.82	New [this study]			FMNH168347
	FMNH171791	Lophuromys kilonzoi	aquilus										Yes	Yes	38.6619	-4.92288	Nilo	TZ	Nilo_TZ_FMNH171791	FMNH: 171791	2000	Male	Adult	58.63	29.81	15.36	13.2	12.95	8.62	7.24	7.08	6.91	6.56	5.5	4.69	4.97	3.94	3.34	New [this study]			FMNH171791
	FMNH197827	Lophuromys kilonzoi	aquilus	H_57	52	29	Yes	Yes			Yes		Yes		-6.91585	36.5595	Rubeho	TZ	Rubeho_TZ_FMNH197827	FMNH: 197827	2007	Male	Old adult		29.4	15.38	12.9	12.6	8.41	7.26	6.88	6.37	6.07	5.29	4.81	5.03	4.03	3.01	New [this study]			FMNH197827
	FMNH197829	Lophuromys kilonzoi	aquilus	H_57	52	29	Yes	Yes		Yes	Yes		Yes	Yes	-6.91585	36.5595	Rubeho	TZ	Rubeho_TZ_FMNH197829	FMNH: 197829	2007	Male	Young adult	53.34	27.31	14.14	12.48	11.17	7.51	7.07	6.67	5.92	6.2	4.94	5.12	4.86	4.27	2.77	New [this study]			FMNH197829
	FMNH197830	Lophuromys kilonzoi	aquilus	H_56	52	29	Yes	Yes	Yes		Yes	Yes	Yes	Yes	-6.91585	36.5595	Rubeho	TZ	Rubeho_TZ_FMNH197830	FMNH: 197830	2007	Male	Young adult	54.84	27.73	14.83	13.08	11.9	7.74	7.31	6.8	5.89	6.44	5.36	4.92	4.92	4.26	2.78	New [this study]			FMNH197830
	FMNH197832	Lophuromys kilonzoi	aquilus										Yes	Yes	36.5595	-6.91585	Rubeho	TZ	Rubeho_TZ_FMNH197832	FMNH: 197832	2007	Male	Young adult	55.14	27.91	14.78	12.87	11.72	7.75	7.08	6.66	6.04	6.23	5.27	5.18	4.92	4.25	3.08	New [this study]			FMNH197832
	FMNH197833	Lophuromys kilonzoi	aquilus										Yes	Yes	36.5595	-6.91585	Rubeho	TZ	Rubeho_TZ_FMNH197833	FMNH: 197833	2007	Male	Adult	56.84	29.36	14.6	13.06	12.02	8.07	7.27	6.85	6.41	6.19	5.24	5.18	5.4	4.64	2.96	New [this study]			FMNH197833
	FMNH197836	Lophuromys kilonzoi	aquilus				Yes	Yes					Yes	Yes	36.572	-6.8337	Rubeho	TZ	Rubeho_TZ_FMNH197836	FMNH: 197836	2007	Male	Adult	57.59	29.25	15.24	13.21	12.52	8.27	7.24	6.94	6.52	6.31	5.57	5.05	5.11	4.27	2.98	New [this study]			FMNH197836
	FMNH197837	Lophuromys kilonzoi	aquilus	H_57	52	29	Yes	Yes			Yes		Yes	Yes	-6.8337	36.572	Rubeho	TZ	Rubeho_TZ_FMNH197837	FMNH: 197837	2007	Male	Adult	57.52	29.35	14.86	12.31	12.49	8.11	7.37	6.68	6.72	6.34	5.41	5.09	5.01	4.22	3.1	New [this study]			FMNH197837
	FMNH197838	Lophuromys kilonzoi	aquilus										Yes	Yes	36.572	-6.8337	Rubeho	TZ	Rubeho_TZ_FMNH197838	FMNH: 197838	2007	Male	Adult	55.51	28.11	14.92	13.06	11.83	7.62	7.45	6.97	6.42	6.28	5.42	5.19	4.85	4.1	2.94	New [this study]			FMNH197838
	FMNH197840	Lophuromys kilonzoi	aquilus										Yes	Yes	36.7273	-7.43774	Rubeho	TZ	Rubeho_TZ_FMNH197840	FMNH: 197840	2007	Female	Adult	55.88	28.54	15.28	12.99	11.82	8.11	6.34	7.05	6.46	6.33	5.24	5.17	5.02	4.05	3.04	New [this study]			FMNH197840
	FMNH27368	Lophuromys kilonzoi	aquilus										Yes	Yes	38.25	-4.66667	WUsambara	TZ	WUsambara_TZ_FMNH27368	FMNH: 27368	1926	Female	Young adult	55.86	28.42	14.39	12.97	11.96	7.84	7.19	6.83	6.57	6.3	5.43	5.3	4.97	3.76	3.16	New [this study]			FMNH27368
	FMNH27369	Lophuromys kilonzoi	aquilus										Yes	Yes	38.25	-4.66667	WUsambara	TZ	WUsambara_TZ_FMNH27369	FMNH: 27369	1926	Male	Adult	55.72	28.05	14.95	13.17	11.7	8.29	7.37	6.92	6.53	6.54	5.47	4.83	5.22	3.93	3.09	New [this study]			FMNH27369
	FMNH27373	Lophuromys kilonzoi	aquilus										Yes	Yes	38.25	-4.66667	WUsambara	TZ	WUsambara_TZ_FMNH27373	FMNH: 27373	1926	Male	Young adult	54.22	27.78	13.62	12.71	11.46	7.92	7.2	6.57	6.09	6.2	5.17	4.86	4.91	4.09	3.01	New [this study]			FMNH27373
	KY595870	Lophuromys kilonzoi	aquilus	H_53	52	29	Yes			Yes					-5.1	38.6	Usambara	TZ	LXXVI																				GenBank	KY595870		KY595870
	KY595870x	Lophuromys kilonzoi	aquilus	H_53	52	29	Yes								-5.1	38.6	Usambara	TZ	Usambara_TZ_KY595870																				GenBank			KY595870x
	KY595871	Lophuromys kilonzoi	aquilus	H_55	52	29	Yes								-5.1	38.6	Usambara	TZ	Usambara_TZ_KY595871																				GenBank	KY595871		KY595871
	KY595872	Lophuromys kilonzoi	aquilus	H_53	52	29	Yes								-5.1	38.6	Usambara	TZ	Usambara_TZ_KY595872																				GenBank	KY595872		KY595872
	KY595891	Lophuromys kilonzoi	aquilus	H_54	52	29	Yes								-5.3778	37.4803	Kiberashi	TZ	Kiberashi_TZ_KY595891																				GenBank	KY595891		KY595891
	KY595894	Lophuromys kilonzoi	aquilus	H_53	52	29	Yes								-6.8337	36.572	Rubeho	TZ	Rubeho_TZ_KY595894																				GenBank	KY595894		KY595894
	KY595895	Lophuromys kilonzoi	aquilus	H_53	52	29	Yes								-6.8337	36.572	Rubeho	TZ	Rubeho_TZ_KY595895																				GenBank	KY595895		KY595895
	RUCAx10323	Lophuromys kilonzoi	aquilus	H_53	52	29	Yes								-5.0295	38.6033	Usambara	TZ	RUCAx10323																				African Mammalia			RUCAx10323
	RUCAx12278	Lophuromys kilonzoi	aquilus	H_52	53	29	Yes								-6.53	37.4	Morningside	TZ	RUCAx12278																				African Mammalia			RUCAx12278
	RUCAx3760	Lophuromys kilonzoi	aquilus	H_51	53	29	Yes			Yes					-6.53	37.4	Morningside	TZ	RUCAx3760																				African Mammalia			RUCAx3760
	RUCAx979	Lophuromys kilonzoi	aquilus	H_51	53	29	Yes			Yes					-5.0295	38.6033	Usambara	TZ	RUCAx979																				African Mammalia			RUCAx979
	T8x367	Lophuromys kilonzoi	aquilus	H_53	52	29	Yes								-5.0295	38.6033	Usambara	TZ	T8x367																				GenBank	KY595870		T8x367
	T8x369	Lophuromys kilonzoi	aquilus	H_55	52	29	Yes								-5.0295	38.6033	Usambara	TZ	T8x369																				GenBank	KY595871		T8x369
	T8x370	Lophuromys kilonzoi	aquilus	H_53	52	29	Yes								-5.0295	38.6033	Usambara	TZ	T8x370																				GenBank	KY595872		T8x370
	TZ10322	Lophuromys kilonzoi	aquilus	H_53	52	29	Yes								-6.37917	36.9361	Ukaguru	TZ	10322_Ukaguru_TZ																				African Mammalia			TZ10322
	TZ27752	Lophuromys kilonzoi	aquilus	H_54	52	29	Yes			Yes					-5.3778	37.4803	Kiberashi	TZ	TZ27752																				GenBank	KY595891		TZ27752
	TZ7927	Lophuromys kilonzoi	aquilus	H_53	52	29	Yes			Yes					-4.76023	38.2982	Magamba	TZ	7927_Magamba_TZ																				African Mammalia			TZ7927
	FMNH137513	Lophuromys laticeps	aquilus										Yes	Yes	29.5665	-3.19845	Kibira	BI	Kibira_BI_FMNH137513	FMNH: 137513	1990	Female	Old adult	54.72	28.45	14.5	12.7	11.76	8.13	7.05	7.03	6.37	5.82	5.04	5.07	4.74	4.1	2.89	New [this study]			FMNH137513
	FMNH137726	Lophuromys laticeps	aquilus										Yes	Yes	29.5665	-3.19845	Kibira	BI	Kibira_BI_FMNH137726	FMNH: 137726	1990	Female	Adult	54.85	27.99	14.51	12.92	11.37	8.1	7.21	6.77	6.8	6.04	5.19	5.02	4.79	4.09	3.12	New [this study]			FMNH137726
	FMNH137729	Lophuromys laticeps	aquilus										Yes	Yes	29.5665	-3.19845	Kibira	BI	Kibira_BI_FMNH137729	FMNH: 137729	1990	Male	Young adult	54.71	27.73	14.68	13.12	11.2	7.95	7.42	6.82	6.46	6.35	5.26	4.98	4.85	4.04	2.9	New [this study]			FMNH137729
	FMNH137734	Lophuromys laticeps	aquilus	H_142	35	26	Yes								-3.15771	29.5516	Kibira	BI	Kibira_BI_FMNH137734																				New [this study]			FMNH137734
	FMNH137750	Lophuromys laticeps	aquilus	H_142	35	26	Yes								-3.15771	29.5516	Kibira	BI	Kibira_BI_FMNH137750																				New [this study]			FMNH137750
	FMNH137751	Lophuromys laticeps	aquilus	H_142	35	26	Yes			Yes					-3.15771	29.5516	Kibira	BI	Kibira_BI_FMNH137751																				New [this study]			FMNH137751
	FMNH137752	Lophuromys laticeps	aquilus	H_143	35	26	Yes								-3.15771	29.5516	Kibira	BI	Kibira_BI_FMNH137752																				New [this study]			FMNH137752
	FMNH148476	Lophuromys laticeps	aquilus										Yes		29.5333	-3.1666	Kibira	BI	Kibira_BI_FMNH148476	FMNH: 148476	1990	Male	Adult		29.4	15.31	13.03	12.81	8.1	7.56	6.95	6.5	6.22	5.52	4.95	4.47	3.91	2.91	New [this study]			FMNH148476
	FMNH148478	Lophuromys laticeps	aquilus										Yes	Yes	29.5333	-3.1666	Kibira	BI	Kibira_BI_FMNH148478	FMNH: 148478	1990	Female	Adult	55.04	27.86	14.89	13.3	11.81	8.05	7.38	7.06	5.87	6.46	5.34	4.73	5.05	4.21	2.85	New [this study]			FMNH148478
	FMNH148481	Lophuromys laticeps	aquilus										Yes	Yes	29.5333	-3.1666	Kibira	BI	Kibira_BI_FMNH148481	FMNH: 148481	1990	Male	Adult	54.83	28.12	14.56	12.98	11.58	8.1	7.34	6.84	5.93	6.16	4.96	4.91	4.93	4.24	2.97	New [this study]			FMNH148481
	FMNH148503	Lophuromys laticeps	aquilus										Yes	Yes	29.4166	-2.8333	Kibira	BI	Kibira_BI_FMNH148503	FMNH: 148503	1992	Male	Young adult	54.87	27.84	14.68	13	11.88	7.91	6.99	6.82	6.16	6.07	5.45	4.85	4.7	3.99	2.71	New [this study]			FMNH148503
	FMNH148506	Lophuromys laticeps	aquilus										Yes	Yes	29.4166	-2.8333	Kibira	BI	Kibira_BI_FMNH148506	FMNH: 148506	1992	Male	Young adult	54.22	27.81	14.19	12.88	12.23	7.8	6.95	6.25	6.07	6.3	5.19	4.86	4.94	4.17	2.64	New [this study]			FMNH148506
	FMNH148511	Lophuromys laticeps	aquilus										Yes	Yes	29.4166	-2.8333	Kibira	BI	Kibira_BI_FMNH148511	FMNH: 148511	1992	Male	Adult	56.52	28.76	15.42	13.25	11.92	8.21	7.13	6.74	6.48	6.52	5.63	5	4.88	4.28	2.89	New [this study]			FMNH148511
	FMNH148520	Lophuromys laticeps	aquilus										Yes	Yes	29.5166	-3	Kibira	BI	Kibira_BI_FMNH148520	FMNH: 148520	1990	Female	Old adult	55.21	28.05	15.17	13.16	11.81	7.73	7.13	7.06	6.56	6.54	5.48	5.11	4.76	4.22	3.03	New [this study]			FMNH148520
	FMNH148523	Lophuromys laticeps	aquilus										Yes	Yes	29.5	-2.95	Kibira	BI	Kibira_BI_FMNH148523	FMNH: 148523	1992	Male	Young adult	54.92	28.41	14.86	13.29	11.65	8.09	7.21	6.64	6.16	6.42	5.57	4.82	5.13	4.28	2.8	New [this study]			FMNH148523
	FMNH149105	Lophuromys laticeps	aquilus	H_143	35	26	Yes						Yes	Yes	-3.15771	29.5516	Kibira	BI	Kibira_BI_FMNH149105	FMNH: 149105	1991	Male	Adult	54.95	27.77	14.97	13.11	11.52	8.09	7.01	6.82	6.23	6.11	5.16	5.43	4.94	3.85	2.89	New [this study]			FMNH149105
	FMNH149110	Lophuromys laticeps	aquilus	H_143	35	26	Yes						Yes	Yes	-2.85893	29.4201	Kibira	BI	Kibira_BI_FMNH149110	FMNH: 149110	1991		Young adult	54.42	27.33	14.76	12.81	11.46	7.43	7.15	6.56	6.08	6.06	5.41	4.98	4.6	3.91	2.9	New [this study]			FMNH149110
	FMNH149111	Lophuromys laticeps	aquilus										Yes	Yes	29.4	-2.8666	Kibira	BI	Kibira_BI_FMNH149111	FMNH: 149111	1991	Female	Young adult	53.72	27.04	15.04	12.88	11.49	7.5	7.18	6.78	6.14	6.18	5.11	4.84	4.98	3.51	3.02	New [this study]			FMNH149111
	FMNH149136	Lophuromys laticeps	aquilus										Yes	Yes	29.4	-2.8666	Kibira	BI	Kibira_BI_FMNH149136	FMNH: 149136	1991	Male	Adult	55.65	28.26	14.69	12.96	11.93	7.82	7.52	6.83	6.58	6.28	5.58	5.01	4.98	3.96	2.93	New [this study]			FMNH149136
	FMNH149147	Lophuromys laticeps	aquilus	H_143	35	26	Yes			Yes					-2.85893	29.4201	Kibira	BI	Kibira_BI_FMNH149147																				New [this study]			FMNH149147
	FMNH149153	Lophuromys laticeps	aquilus										Yes		29.4	-2.8666	Kibira	BI	Kibira_BI_FMNH149153	FMNH: 149153	1991	Male	Adult		27.74	15.3	13.16	11.86	7.84	7.19	6.82	6.32	6.09	5.21	5.08	4.74	3.82	2.86	New [this study]			FMNH149153
	FMNH156000	Lophuromys laticeps	aquilus										Yes		29.5972	-3.93889	Bururi	BI	Bururi_BI_FMNH156000	FMNH: 156000	1993	Female	Adult		29.71	15.96	13.79	12.27	8.25	7.17	7.39	6.62	6.47	5.73	5.41	5.17	4.37	3.11	New [this study]			FMNH156000
	FMNH156001	Lophuromys laticeps	aquilus										Yes		29.5972	-3.93889	Bururi	BI	Bururi_BI_FMNH156001	FMNH: 156001	1993	Female	Adult		30.98	15.83	13.46	13.56	8.79	7.77	7.43	6.91	6.26	5.65	5.44	5.36	4.16	3.45	New [this study]			FMNH156001
	FMNH156002	Lophuromys laticeps	aquilus										Yes	Yes	29.5972	-3.93889	Bururi	BI	Bururi_BI_FMNH156002	FMNH: 156002	1993	Male	Old adult	58.99	30.22	15.98	13.29	12.87	8.76	7.31	7.71	6.4	6.37	5.41	5.22	4.95	4.64	3.35	New [this study]			FMNH156002
	FMNH156003	Lophuromys laticeps	aquilus										Yes	Yes	29.5972	-3.93889	Bururi	BI	Bururi_BI_FMNH156003	FMNH: 156003	1993	Female	Young adult	55.68	28.07	15.08	13.21	11.91	7.72	7.23	6.96	6.36	6.28	5.5	5.03	4.67	4.23	3.03	New [this study]			FMNH156003
	FMNH207341	Lophuromys laticeps	aquilus										Yes	Yes	29.2531	-2.44097	Nyungwe	RW	Nyungwe_RW_FMNH207341	FMNH: 207341	2009	Female	Old adult	54.74	27.72	14.79	12.77	11.89	8.1	7.04	6.58	6.39	6.23	5.31	4.87	4.78	3.85	2.67	New [this study]			FMNH207341
	FMNH207350	Lophuromys laticeps	aquilus										Yes	Yes	29.2531	-2.44097	Nyungwe	RW	Nyungwe_RW_FMNH207350	FMNH: 207350	2009	Female	Adult	54.13	27.57	15.02	12.94	11.44	7.77	7.12	6.44	6.38	5.96	5.2	4.89	4.83	3.69	3.01	New [this study]			FMNH207350
	FMNH207701	Lophuromys laticeps	aquilus										Yes	Yes	29.1998	-2.60975	Nyungwe	RW	Nyungwe_RW_FMNH207701	FMNH: 207701	2009	Male	Adult	56.64	28.93	14.77	13.16	12.11	8.6	7.32	6.86	6.53	6.51	5.54	4.91	5.09	4.05	3.17	New [this study]			FMNH207701
	FMNH207711	Lophuromys laticeps	aquilus										Yes	Yes	29.1998	-2.60975	Nyungwe	RW	Nyungwe_RW_FMNH207711	FMNH: 207711	2009	Male	Adult	53.95	27.47	14.1	12.5	11.77	7.94	7.14	6.68	6.47	6.04	5.5	4.87	4.75	3.6	3.03	New [this study]			FMNH207711
	FMNH207714	Lophuromys laticeps	aquilus										Yes		29.1998	-2.60975	Nyungwe	RW	Nyungwe_RW_FMNH207714	FMNH: 207714	2009	Male	Young adult		27.67	14.66	12.97	11.9	7.84	7.52	6.63	6.24	5.95	5.31	4.85	4.66	4.19	2.75	New [this study]			FMNH207714
	FMNH207715	Lophuromys laticeps	aquilus										Yes	Yes	29.2376	-2.50147	Nyungwe	RW	Nyungwe_RW_FMNH207715	FMNH: 207715	2009	Female	Young adult	53.95	27.43	14.48	12.85	11.5	7.77	7.34	6.72	6.52	6.22	5.52	4.75	4.84	3.74	2.94	New [this study]			FMNH207715
	JCK5607	Lophuromys laticeps	aquilus	H_143	35	26	Yes								-2.60975	29.1998	Nyungwe	RW	Nyungwe_RW_JCK5607																				New [this study]			JCK5607
	JCK5624	Lophuromys laticeps	aquilus	H_143	35	26	Yes								-2.44097	29.2531	Nyungwe	RW	Nyungwe_RW_JCK5624																				New [this study]			JCK5624
	JCK5682	Lophuromys laticeps	aquilus	H_143	35	26	Yes								-2.44097	29.2531	Nyungwe	RW	Nyungwe_RW_JCK5682																				New [this study]			JCK5682
	JCK5710	Lophuromys laticeps	aquilus	H_143	35	26	Yes			Yes					-2.44097	29.2531	Nyungwe	RW	Nyungwe_RW_JCK5710																				New [this study]			JCK5710
	JCK5773	Lophuromys laticeps	aquilus	H_143	35	26	Yes			Yes					-2.44097	29.2531	Nyungwe	RW	Nyungwe_RW_JCK5773																				New [this study]			JCK5773
	KY595881	Lophuromys laticeps	aquilus	H_140	36	26	Yes			Yes							Kalebe	TZ	Kalebe_TZ_KY595881																				GenBank	KY595881		KY595881
	KY595882	Lophuromys laticeps	aquilus	H_142	35	26	Yes			Yes					-4.7316	29.7058	Bitale	TZ	Bitale_TZ_KY595882																				GenBank	KY595882		KY595882
	KY595883	Lophuromys laticeps	aquilus	H_142	35	26	Yes			Yes					-4.7316	29.7058	Bitale	TZ	KY595883																				GenBank	KY595883		KY595883
	RW5379	Lophuromys laticeps	aquilus	H_143	35	26	Yes			Yes					-2.05565	29.3518	Kibuye	RW	Kibuye_RW_5379																				African Mammalia			RW5379
	TA232	Lophuromys laticeps	aquilus	H_140	36	26	Yes			Yes					-2.9642	31.2079	Kelebe	TZ	TA232																				GenBank	KY595881		TA232
	TA289	Lophuromys laticeps	aquilus	H_141	35	26	Yes								-4.7316	29.7058	Bitale	TZ	TA289																				GenBank	MN617004		TA289
	FMNH155421	Lophuromys machangui	aquilus										Yes	Yes	35.9389	-8.34722	Udzungwa	TZ	Udzungwa_TZ_FMNH155421	FMNH: 155421	1995	Male	Old adult	58.36	29.67	16.03	12.94	13.3	8.36	7.58	7.41	6.51	6.38	5.6	4.92	5.37	3.93	3.03	New [this study]			FMNH155421
	FMNH155580	Lophuromys machangui	aquilus	H_175	37	30	Yes	Yes	Yes	Yes	Yes	Yes	Yes	Yes	-8.475	35.9069	Udzungwa	TZ	Udzungwa_TZ_FMNH155580	FMNH: 155580	1995	Female	Young adult	52.22	26.66	14.27	12.52	11.5	7.24	7.25	6.83	6.15	6.08	5.35	5.04	4.42	3.54	3.03	New [this study]			FMNH155580
	FMNH155585	Lophuromys machangui	aquilus										Yes	Yes	35.9389	-8.34722	Udzungwa	TZ	Udzungwa_TZ_FMNH155585	FMNH: 155585	1995	Male	Adult	55.06	27.99	14.73	12.77	11.73	8.02	7.32	6.98	6.3	6.09	5.25	5.03	4.92	4.21	3.12	New [this study]			FMNH155585
	FMNH155591	Lophuromys machangui	aquilus										Yes	Yes	35.9389	-8.34722	Udzungwa	TZ	Udzungwa_TZ_FMNH155591	FMNH: 155591	1995	Male	Old adult	57.74	29.58	15.27	12.99	12.43	8.93	7.93	7.43	7	6.79	5.43	4.92	4.93	4.08	3.09	New [this study]			FMNH155591
	FMNH155592	Lophuromys machangui	aquilus	H_175	37	30	Yes	Yes	Yes		Yes	Yes	Yes		-8.34722	35.9389	Udzungwa	TZ	Udzungwa_TZ_FMNH155592	FMNH: 155592	1995	Female	Adult		28.8	14.66	12.65	11.69	8.49	7.08	7.08	6.4	6.28	5.5	4.97	5.22	4.23	3.1	New [this study]			FMNH155592
	FMNH155594	Lophuromys machangui	aquilus	H_176	37	30	Yes	Yes	Yes	Yes	Yes	Yes	Yes	Yes	-8.34722	35.9389	Udzungwa	TZ	Udzungwa_TZ_FMNH155594	FMNH: 155594	1995	Male	Old adult	55.67	28.87	14.33	12.27	12.12	8.15	7.37	7.03	6.45	6.6	5.27	5.26	5.09	4.22	3.08	New [this study]			FMNH155594
	FMNH159238	Lophuromys machangui	aquilus										Yes	Yes	36.4634	-7.75195	Udzungwa	TZ	Udzungwa_TZ_FMNH159238	FMNH: 159238	1994	Male	Old adult	60.84	30.93	16.08	13.31	13.76	8.79	7.56	7.13	7	6.95	5.54	5.01	5.79	4.07	3.58	New [this study]			FMNH159238
	FMNH163602	Lophuromys machangui	aquilus				Yes	Yes					Yes	Yes	33.6375	-9.16806	Rungwe	TZ	Rungwe_TZ_FMNH163602	FMNH: 163602	1998	Male	Adult	55.99	28.66	14.88	13.11	12.31	8.04	7.85	6.94	6.39	6.32	5.17	5.03	5.13	4.15	2.98	New [this study]			FMNH163602
	FMNH163603	Lophuromys machangui	aquilus				Yes	Yes					Yes	Yes	33.6375	-9.16806	Rungwe	TZ	Rungwe_TZ_FMNH163603	FMNH: 163603	1998	Female	Old adult	55.99	28.38	14.66	12.83	11.82	8.53	7.43	6.93	6.22	6.15	5.14	4.91	5.03	4.76	3.13	New [this study]			FMNH163603
	FMNH163605	Lophuromys machangui	aquilus	H_178	37	32	Yes	Yes		Yes	Yes		Yes	Yes	-9.16806	33.6375	Rungwe	TZ	Rungwe_TZ_FMNH163605	FMNH: 163605	1998	Female	Old adult	55.21	28.45	15.08	12.94	12.17	8.2	7.32	6.83	6.64	6.01	5.18	5.24	4.77	3.9	2.96	New [this study]			FMNH163605
	FMNH163608	Lophuromys machangui	aquilus										Yes	Yes	33.6375	-9.16806	Rungwe	TZ	Rungwe_TZ_FMNH163608	FMNH: 163608	1998	Female	Old adult	58.34	30	15.12	12.84	13.02	8.77	7.74	7.07	7	6.17	5.31	5.36	5.06	4.11	3.21	New [this study]			FMNH163608
	FMNH163609	Lophuromys machangui	aquilus										Yes	Yes	33.6375	-9.16806	Rungwe	TZ	Rungwe_TZ_FMNH163609	FMNH: 163609	1998	Female	Old adult	56.52	28.68	14.99	12.89	12.42	8.04	7.25	6.97	6.34	5.88	5.33	5.24	5	4.43	3.38	New [this study]			FMNH163609
	FMNH163613	Lophuromys machangui	aquilus				Yes	Yes					Yes	Yes	33.6528	-9.18056	Rungwe	TZ	Rungwe_TZ_FMNH163613	FMNH: 163613	1998	Female	Old adult	56.76	29.42	14.39	12.4	12.28	8.77	7.27	6.78	6.97	5.99	5.19	5.33	4.97	4.11	2.68	New [this study]			FMNH163613
	FMNH163614	Lophuromys machangui	aquilus	H_178	37	32	Yes						Yes	Yes	-9.18056	33.6528	Rungwe	TZ	Rungwe_TZ_FMNH163614	FMNH: 163614	1998	Female	Old adult	56.97	29.01	14.84	12.8	12.4	8.38	7.15	7.05	6.76	6.08	5.19	5.11	5.05	3.95	3.22	New [this study]			FMNH163614
	FMNH163622	Lophuromys machangui	aquilus										Yes	Yes	33.6569	-9.19167	Rungwe	TZ	Rungwe_TZ_FMNH163622	FMNH: 163622	1998	Female	Adult	53.07	27.31	13.92	12.56	11.37	8.01	7.02	6.75	6.38	5.71	5.21	4.95	4.56	3.69	2.86	New [this study]			FMNH163622
	FMNH163623	Lophuromys machangui	aquilus										Yes	Yes	33.6569	-9.19167	Rungwe	TZ	Rungwe_TZ_FMNH163623	FMNH: 163623	1998	Male	Adult	57.46	29.69	15.42	13.1	12.29	8.67	7.56	6.94	6.96	6.3	5.4	5.36	4.97	4.15	3.33	New [this study]			FMNH163623
	FMNH163624	Lophuromys machangui	aquilus										Yes	Yes	33.6569	-9.19167	Rungwe	TZ	Rungwe_TZ_FMNH163624	FMNH: 163624	1998	Male	Adult	55.79	28.23	14.89	13.01	12.19	8.25	6.99	6.83	6.67	6.25	5.28	4.86	4.77	3.98	3.34	New [this study]			FMNH163624
	FMNH163625	Lophuromys machangui	aquilus										Yes	Yes	33.6569	-9.19167	Rungwe	TZ	Rungwe_TZ_FMNH163625	FMNH: 163625	1998	Male	Adult	55.19	28.18	14.38	12.43	11.89	8.29	7.23	6.95	6.66	6	5.2	4.93	5.04	4.25	3.15	New [this study]			FMNH163625
	FMNH168109	Lophuromys machangui	aquilus	H_181	37	32	Yes	Yes	Yes	Yes	Yes	Yes	Yes	Yes	-9.06361	33.9231	Kitulo	TZ	Kitulo_TZ_FMNH168109	FMNH: 168109	2000	Male	Adult	57.18	28.66	15.19	12.67	12.11	8.2	7.69	7.03	6.47	6.06	5.38	5.21	4.94	4.37	3.03	New [this study]			FMNH168109
	FMNH168110	Lophuromys machangui	aquilus				Yes	Yes	Yes				Yes	Yes	33.9231	-9.06361	Kitulo	TZ	Kitulo_TZ_FMNH168110	FMNH: 168110	2000	Female	Old adult	59.41	30.38	15.8	12.86	12.81	9.2	7.68	7.3	6.64	6.28	5.63	5.08	5.26	4.53	3.24	New [this study]			FMNH168110
	FMNH168111	Lophuromys machangui	aquilus				Yes	Yes					Yes	Yes	33.9231	-9.06361	Kitulo	TZ	Kitulo_TZ_FMNH168111	FMNH: 168111	2000	Male	Adult	55.4	28.04	15.07	12.64	11.46	8.06	7.37	7.16	6.05	6.11	5.27	5.19	5.1	4.41	3.03	New [this study]			FMNH168111
	FMNH177704	Lophuromys machangui	aquilus	H_175	37	30	Yes	Yes	Yes		Yes	Yes	Yes	Yes	-7.75195	36.4634	Udzungwa	TZ	Udzungwa_TZ_FMNH177704	FMNH: 177704	2003	Female	Old adult	55.87	28.31	15.07	12.98	11.87	8.21	7.13	7.24	6.71	6.27	5.15	5.07	5.19	4.11	3.21	New [this study]			FMNH177704
	FMNH181182	Lophuromys machangui	aquilus	H_183	37	30	Yes	Yes		Yes	Yes		Yes	Yes	-15.9743	35.5505	Mulanje	MW	Mulanje_MW_FMNH181182	FMNH: 181182	2004	Male	Adult	57.63	29.51	14.37	12.55	12.37	8.42	7.21	6.86	6.51	6.03	4.9	5.09	5.03	4.48	3.23	New [this study]			FMNH181182
	FMNH181183	Lophuromys machangui	aquilus	H_184	37	30	Yes	Yes			Yes		Yes	Yes	-15.9743	35.5505	Mulanje	MW	Mulanje_MW_FMNH181183	FMNH: 181183	2004	Male	Young adult	56.34	28.57	14.94	12.9	11.79	8.24	7.49	6.74	6.52	6.18	5.07	4.97	5.17	4.41	3.06	New [this study]			FMNH181183
	FMNH181184	Lophuromys machangui	aquilus	H_182	37	30	Yes	Yes	Yes		Yes	Yes	Yes		-15.9743	35.5505	Mulanje	MW	Mulanje_MW_FMNH181184	FMNH: 181184	2004	Male	Adult		31.55	16.09	13.23	13.26	9.07	7.57	7.43	6.89	6.69	5.28	5.35	5.4	4.79	3.41	New [this study]			FMNH181184
	FMNH181187	Lophuromys machangui	aquilus										Yes	Yes	35.5505	-15.9743	Mulanje	MW	Mulanje_MW_FMNH181187	FMNH: 181187	2004	Male	Adult	57.4	29.49	15.07	12.97	12.58	8.23	7.33	6.87	6.51	6.07	5.21	5.02	5	4.25	3.15	New [this study]			FMNH181187
	FMNH181188	Lophuromys machangui	aquilus	H_182	37	30	Yes	Yes	Yes		Yes	Yes	Yes		-15.9999	35.7235	Mulanje	MW	Mulanje_MW_FMNH181188	FMNH: 181188	2004	Male	Adult		29.84	15.29	12.88	12.37	8.74	7.37	7.19	6.77	6.13	5.04	5.04	5.22	4.59	3.17	New [this study]			FMNH181188
	FMNH181191	Lophuromys machangui	aquilus				Yes	Yes	Yes				Yes	Yes	35.7235	-15.9999	Mulanje	MW	Mulanje_MW_FMNH181191	FMNH: 181191	2004	Female	Young adult	55.4	28.21	14.51	12.41	11.64	7.86	7.08	6.89	6.42	5.81	5.13	5.19	4.77	4.18	3.13	New [this study]			FMNH181191
	FMNH183764	Lophuromys machangui	aquilus	H_184	37	30	Yes	Yes		Yes	Yes		Yes	Yes	-15.3993	37.0428	Namuli	MZ	Namuli_MZ_FMNH183764	FMNH: 183764	2003	Female	Young adult	55.77	28.55	14.13	12.79	12	8.13	7.03	6.84	6.22	6.07	5.02	4.95	5.02	4.29	2.79	New [this study]			FMNH183764
	FMNH183765	Lophuromys machangui	aquilus				Yes	Yes					Yes	Yes	37.0428	-15.3993	Namuli	MZ	Namuli_MZ_FMNH183765	FMNH: 183765	2003	Male	Old adult	59.75	30.67	15.63	13.24	12.82	8.85	7.33	7.33	6.54	6.54	5.16	5.1	5.3	4.65	3.26	New [this study]			FMNH183765
	FMNH183767	Lophuromys machangui	aquilus				Yes	Yes					Yes	Yes	37.0428	-15.3993	Namuli	MZ	Namuli_MZ_FMNH183767	FMNH: 183767	2003	Male	Adult	55.44	28.29	14.74	13.37	11.78	7.3	7.05	6.94	6.07	6.29	5.28	4.98	4.99	4.35	2.99	New [this study]			FMNH183767
	FMNH183768	Lophuromys machangui	aquilus										Yes		37.0428	-15.3993	Namuli	MZ	Namuli_MZ_FMNH183768	FMNH: 183768	2003	Male	Old adult		29.63	15.55	13.06	12	8.58	7.3	7.2	6.26	6.35	5.09	4.98	5.42	4.55	2.82	New [this study]			FMNH183768
	FMNH183772	Lophuromys machangui	aquilus				Yes	Yes					Yes	Yes	37.0743	-15.4135	Namuli	MZ	Namuli_MZ_FMNH183772	FMNH: 183772	2003	Male	Adult	57.3	29.22	14.9	12.87	12.18	8.24	7.22	6.76	6.74	5.95	5.24	4.84	4.83	4.17	3.03	New [this study]			FMNH183772
	FMNH183773	Lophuromys machangui	aquilus				Yes	Yes					Yes	Yes	37.0743	-15.4135	Namuli	MZ	Namuli_MZ_FMNH183773	FMNH: 183773	2003	Male	Adult	59.6	30.69	16.18	13.45	12.98	8.83	7.26	7.14	6.45	6.27	5.51	5.04	5.08	4.7	3.05	New [this study]			FMNH183773
	FMNH183777	Lophuromys machangui	aquilus										Yes	Yes	37.0428	-15.3993	Namuli	MZ	Namuli_MZ_FMNH183777	FMNH: 183777	2003	Male	Adult	55.54	28.5	14.73	12.78	11.68	8.35	6.94	6.83	5.97	6.13	5.02	4.73	4.88	4.44	3.09	New [this study]			FMNH183777
	FMNH183778	Lophuromys machangui	aquilus										Yes	Yes	37.0428	-15.3993	Namuli	MZ	Namuli_MZ_FMNH183778	FMNH: 183778	2003	Female	Adult	54.84	27.98	14.56	12.73	11.57	8.15	6.92	6.82	6.25	6.19	5.21	4.97	4.96	4.23	2.99	New [this study]			FMNH183778
	FMNH183779	Lophuromys machangui	aquilus										Yes		37.0428	-15.3993	Namuli	MZ	Namuli_MZ_FMNH183779	FMNH: 183779	2003	Female	Adult		28.1	14.37	12.49	11.74	7.95	6.9	6.73	6.31	5.85	5.09	4.91	4.84	4.19	2.96	New [this study]			FMNH183779
	FMNH183781	Lophuromys machangui	aquilus										Yes	Yes	37.0428	-15.3993	Namuli	MZ	Namuli_MZ_FMNH183781	FMNH: 183781	2003	Female	Old adult	58.51	30.19	15.18	13.08	12.79	8.61	6.93	7.32	6.18	6.29	5.32	5.03	5.25	4.76	3.04	New [this study]			FMNH183781
	FMNH191816	Lophuromys machangui	aquilus										Yes	Yes	33.8083	-10.5769	Nyika	MW	Nyika_MW_FMNH191816	FMNH: 191816	2004		Old adult	57.91	29.68	15.66	13.25	12.35	8.38	6.87	7.07	6.94	6.59	5.64	5.15	5.04	4.4	2.96	New [this study]			FMNH191816
	FMNH191822	Lophuromys machangui	aquilus										Yes	Yes	33.8083	-10.5769	Nyika	MW	Nyika_MW_FMNH191822	FMNH: 191822	2004	Female	Adult	57.69	29.33	15.48	13	12.93	8.36	7.12	7.09	7.05	6.03	5.35	5.26	4.89	3.8	3.02	New [this study]			FMNH191822
	FMNH191827	Lophuromys machangui	aquilus										Yes	Yes	33.8083	-10.5769	Nyika	MW	Nyika_MW_FMNH191827	FMNH: 191827	2004	Female	Old adult	59.1	30.12	15.65	12.93	12.84	8.66	7.4	7.14	7.04	6.39	5.21	5.2	5.33	4.08	3.02	New [this study]			FMNH191827
	FMNH191830	Lophuromys machangui	aquilus				Yes	Yes					Yes	Yes	33.76	-10.5768	Nyika	MW	Nyika_MW_FMNH191830	FMNH: 191830	2004	Female	Young adult	55.68	28.4	14.92	13.06	11.81	8.13	7.1	6.9	6.51	6.13	5.14	5.03	4.67	4.25	3.06	New [this study]			FMNH191830
	FMNH191831	Lophuromys machangui	aquilus										Yes	Yes	33.76	-10.5768	Nyika	MW	Nyika_MW_FMNH191831	FMNH: 191831	2004	Female	Adult	57.25	29.26	14.92	12.97	12.51	8.68	7.24	7.14	6.74	6.29	5.62	4.87	5.04	4.17	3.01	New [this study]			FMNH191831
	FMNH191833	Lophuromys machangui	aquilus										Yes	Yes	33.76	-10.5768	Nyika	MW	Nyika_MW_FMNH191833	FMNH: 191833	2004	Male	Young adult	52.05	26.24	14.5	12.84	10.71	7.4	6.91	6.59	5.78	5.87	5.01	4.88	4.57	4.2	2.92	New [this study]			FMNH191833
	FMNH191836	Lophuromys machangui	aquilus										Yes	Yes	33.76	-10.5768	Nyika	MW	Nyika_MW_FMNH191836	FMNH: 191836	2004		Young adult	54.95	27.76	14.91	12.8	11.76	7.83	6.82	7.03	6.16	6	5.01	4.99	5.18	4.1	3.08	New [this study]			FMNH191836
	FMNH191840	Lophuromys machangui	aquilus	H_178	37	32	Yes	Yes		Yes	Yes		Yes	Yes	-10.5808	33.7128	Nyika	MW	Nyika_MW_FMNH191840	FMNH: 191840	2004	Male	Young adult	53.35	27.15	14.53	12.62	10.89	7.59	7.19	6.92	6.44	5.71	5.23	5.13	4.52	3.98	2.79	New [this study]			FMNH191840
	FMNH191841	Lophuromys machangui	aquilus										Yes	Yes	33.7128	-10.5808	Nyika	MW	Nyika_MW_FMNH191841	FMNH: 191841	2004	Male	Adult	58	29.49	15.58	13.38	12.42	8.49	7.51	7.06	6.5	6.2	5.31	5.13	4.98	4.13	3.21	New [this study]			FMNH191841
	FMNH191842	Lophuromys machangui	aquilus										Yes	Yes	33.7128	-10.5808	Nyika	MW	Nyika_MW_FMNH191842	FMNH: 191842	2004	Male	Young adult	55.15	27.65	14.5	12.66	11.13	7.92	6.92	6.83	6.77	6.06	5.17	5.31	4.7	4.15	2.79	New [this study]			FMNH191842
	FMNH191847	Lophuromys machangui	aquilus				Yes	Yes					Yes	Yes	33.8164	-10.5994	Nyika	MW	Nyika_MW_FMNH191847	FMNH: 191847	2004		Old adult	59.55	30.5	15.56	12.89	12.78	8.69	7.45	7.71	7.3	6.33	5.39	5.35	5.28	4.2	3.24	New [this study]			FMNH191847
	FMNH191848	Lophuromys machangui	aquilus										Yes	Yes	33.8164	-10.5994	Nyika	MW	Nyika_MW_FMNH191848	FMNH: 191848	2004		Old adult	60.86	31.04	15.95	13.22	12.91	9.13	7.64	7.68	7.2	6.26	5.55	5.16	5.41	4.46	3.37	New [this study]			FMNH191848
	FMNH191851	Lophuromys machangui	aquilus										Yes	Yes	33.8164	-10.5994	Nyika	MW	Nyika_MW_FMNH191851	FMNH: 191851	2004		Old adult	60.45	31.33	16.34	13.2	12.4	9	7.56	7.65	6.59	6.72	5.33	5.33	5.42	4.94	3.21	New [this study]			FMNH191851
	FMNH191858	Lophuromys machangui	aquilus										Yes	Yes	33.8164	-10.5994	Nyika	MW	Nyika_MW_FMNH191858	FMNH: 191858	2004		Old adult	58.32	29.71	15.66	13	12.86	8.66	7.24	7.49	7.14	6.12	5.35	5.01	5.46	3.57	3.06	New [this study]			FMNH191858
	FMNH191860	Lophuromys machangui	aquilus										Yes	Yes	33.8164	-10.5994	Nyika	MW	Nyika_MW_FMNH191860	FMNH: 191860	2004		Old adult	60.11	30.61	15.95	13.58	12.87	9.25	7.3	7.27	7.02	6.3	5.56	5.29	5.18	4.1	3.25	New [this study]			FMNH191860
	FMNH192034	Lophuromys machangui	aquilus										Yes	Yes	33.8	-10.8006	Nyika	MW	Nyika_MW_FMNH192034	FMNH: 192034	2004		Old adult	57.68	29.39	16	13.33	12.65	8.67	6.93	7.45	6.67	6.28	5.28	5	5.16	4.16	3.35	New [this study]			FMNH192034
	FMNH196244	Lophuromys machangui	aquilus	H_179	37	32	Yes								-9.65487	33.5386	Misuku	MW	Misuku_MW_FMNH196244																				New [this study]			FMNH196244
	FMNH196251	Lophuromys machangui	aquilus	H_178	37	32	Yes								-9.65487	33.5386	Misuku	MW	Misuku_MW_FMNH196251																				New [this study]			FMNH196251
	FMNH196266	Lophuromys machangui	aquilus	H_178	37	32	Yes								-9.65487	33.5386	Misuku	MW	Misuku_MW_FMNH196266																				New [this study]			FMNH196266
	FMNH196691	Lophuromys machangui	aquilus	H_178	37	32	Yes								-9.65487	33.5386	Misuku	MW	Misuku_MW_FMNH196691																				New [this study]			FMNH196691
	FMNH196698	Lophuromys machangui	aquilus										Yes	Yes	33.5328	-9.66997	Misuku	MW	Misuku_MW_FMNH196698	FMNH: 196698	2007	Female	Adult	56.67	28.87	15.44	13.14	12.51	8.13	7.17	7.14	7.08	6.33	5.15	5.11	5.24	3.37	3.24	New [this study]			FMNH196698
	FMNH196701	Lophuromys machangui	aquilus										Yes	Yes	33.4791	-9.69572	Misuku	MW	Misuku_MW_FMNH196701	FMNH: 196701	2007	Female	Young adult	56.01	28.24	14.68	12.89	12.14	7.63	7.36	6.81	6.64	6.3	5.3	5.12	4.95	3.73	3.03	New [this study]			FMNH196701
	FMNH196702	Lophuromys machangui	aquilus				Yes						Yes	Yes	33.4791	-9.69572	Misuku	MW	Misuku_MW_FMNH196702	FMNH: 196702	2007	Female	Young adult	56.14	28.21	15.1	13.34	11.8	7.94	7.4	6.86	6.2	6.02	5.01	5.03	4.94	4.2	3	New [this study]			FMNH196702
	FMNH196703	Lophuromys machangui	aquilus										Yes	Yes	33.4791	-9.69572	Misuku	MW	Misuku_MW_FMNH196703	FMNH: 196703	2007	Male	Young adult	54.07	27.57	14.46	12.99	11.69	7.7	7.1	6.95	6.26	6.25	4.99	5.21	5.12	3.79	3.01	New [this study]			FMNH196703
	FMNH196704	Lophuromys machangui	aquilus				Yes						Yes	Yes	33.4791	-9.69572	Misuku	MW	Misuku_MW_FMNH196704	FMNH: 196704	2007	Female	Young adult	55.28	27.94	14.18	12.54	12.28	7.62	7.15	6.63	6.28	6.03	5.18	4.97	4.71	4.1	3.05	New [this study]			FMNH196704
	FMNH196706	Lophuromys machangui	aquilus										Yes	Yes	33.4791	-9.69572	Misuku	MW	Misuku_MW_FMNH196706	FMNH: 196706	2007	Female	Old adult	56.72	28.57	15.2	13.38	12.38	8.12	7.15	7.06	6.82	6.3	5.02	5.3	5.03	4.08	3.03	New [this study]			FMNH196706
	FMNH196707	Lophuromys machangui	aquilus										Yes	Yes	33.4791	-9.69572	Misuku	MW	Misuku_MW_FMNH196707	FMNH: 196707	2007	Male	Young adult	55.53	28.25	14.96	13.12	12	8.13	7.32	6.8	6.59	6.5	5.02	5.08	4.95	4.01	3.08	New [this study]			FMNH196707
	FMNH204688	Lophuromys machangui	aquilus	H_180	37	32	Yes	Yes	Yes		Yes	Yes	Yes	Yes	-9.33512	33.9845	Livingstone	TZ	Livingstone_TZ_FMNH204688	FMNH: 204688	2008	Female	Old adult	58.19	30.16	15.52	12.91	12.35	8.84	7.26	7.25	7.13	6.15	5.39	5.07	5.28	4.36	3.14	New [this study]			FMNH204688
	FMNH204689	Lophuromys machangui	aquilus	H_178	37	32	Yes	Yes	Yes	Yes	Yes	Yes	Yes	Yes	-9.33512	33.9845	Livingstone	TZ	Livingstone_TZ_FMNH204689	FMNH: 204689	2008	Male	Adult	55.87	28.63	14.88	12.92	11.77	8.4	7.17	6.95	6.56	6.13	5.34	5.03	5.07	4.23	3.04	New [this study]			FMNH204689
	FMNH204693	Lophuromys machangui	aquilus										Yes	Yes	33.9845	-9.33512	Livingstone	TZ	Livingstone_TZ_FMNH204693	FMNH: 204693	2008	Male	Old adult	58.09	29.79	15.72	12.84	12.55	8.71	7.44	7.47	6.9	6.24	5.33	5.25	5.41	3.85	3.31	New [this study]			FMNH204693
	FMNH204694	Lophuromys machangui	aquilus										Yes	Yes	33.9845	-9.33512	Livingstone	TZ	Livingstone_TZ_FMNH204694	FMNH: 204694	2008	Male	Old adult	56.02	28.87	14.83	12.33	11.98	8.33	7.21	6.96	6.67	6.03	5.08	5.19	4.95	4.08	3.34	New [this study]			FMNH204694
	FMNH204695	Lophuromys machangui	aquilus				Yes						Yes	Yes	33.9845	-9.33512	Livingstone	TZ	Livingstone_TZ_FMNH204695	FMNH: 204695	2008	Female	Adult	56.68	29.19	15.05	12.18	12.79	8.27	7.42	7	6.85	6.07	5.4	5.1	5.02	3.64	3.2	New [this study]			FMNH204695
	FMNH204873	Lophuromys machangui	aquilus				Yes	Yes					Yes	Yes	33.9606	-9.0693	Livingstone	TZ	Livingstone_TZ_FMNH204873	FMNH: 204873	2008	Female	Old adult	58.61	29.81	15.95	13.28	12.65	8.96	7.66	7.71	7.16	6.32	5.4	5.2	5.35	3.77	3.31	New [this study]			FMNH204873
	FMNH204878	Lophuromys machangui	aquilus										Yes	Yes	33.9606	-9.0693	Livingstone	TZ	Livingstone_TZ_FMNH204878	FMNH: 204878	2008	Male	Old adult	58.35	30	15.58	13.23	12.42	8.97	7.51	7.39	6.57	6.42	5.4	5.31	5.29	5.09	3.27	New [this study]			FMNH204878
	FMNH204881	Lophuromys machangui	aquilus										Yes	Yes	33.9606	-9.0693	Livingstone	TZ	Livingstone_TZ_FMNH204881	FMNH: 204881	2008	Female	Old adult	58.31	29.94	16.07	13.08	12.44	9.07	7.07	7.46	6.85	6.18	5.27	5.17	4.98	4.31	3.45	New [this study]			FMNH204881
	FMNH204885	Lophuromys machangui	aquilus										Yes		33.9606	-9.0693	Livingstone	TZ	Livingstone_TZ_FMNH204885	FMNH: 204885	2008	Male	Old adult		29.98	16.01	13.18	12.61	9.1	7.74	7.26	6.81	6.06	5.5	5.27	5.26	4.63	3.33	New [this study]			FMNH204885
	FMNH204886	Lophuromys machangui	aquilus										Yes	Yes	33.9606	-9.0693	Livingstone	TZ	Livingstone_TZ_FMNH204886	FMNH: 204886	2008	Male	Adult	59.6	30.39	15.65	13.13	12.86	8.82	7.71	7.42	7.35	6.43	5.74	5.39	5.1	4.08	3.39	New [this study]			FMNH204886
	FMNH205157	Lophuromys machangui	aquilus				Yes	Yes					Yes	Yes	33.706	-9.11739	Bujingijila	TZ	Bujingijila_TZ_FMNH205157	FMNH: 205157	2008	Male	Adult	55.67	28.14	14.75	12.67	12.03	8.18	7.32	6.97	6.62	6.28	5.48	5.25	4.98	4.21	3.21	New [this study]			FMNH205157
	FMNH205159	Lophuromys machangui	aquilus	H_181	37	32	Yes	Yes	Yes	Yes	Yes	Yes	Yes	Yes	-9.11739	33.706	Bujingijila	TZ	Bujingijila_TZ_FMNH205159	FMNH: 205159	2008	Female	Old adult	55.74	28.72	14.82	12.7	11.85	8.13	7.39	6.89	7.19	6.06	5.32	5.34	4.84	3.8	2.93	New [this study]			FMNH205159
	FMNH205160	Lophuromys machangui	aquilus										Yes	Yes	33.706	-9.11739	Bujingijila	TZ	Bujingijila_TZ_FMNH205160	FMNH: 205160	2008	Male	Old adult	54.78	28.38	14.77	12.89	12.11	8.39	7.41	7.01	6.64	5.93	5.26	4.9	4.85	3.72	3.09	New [this study]			FMNH205160
	FMNH205161	Lophuromys machangui	aquilus										Yes	Yes	33.706	-9.11739	Bujingijila	TZ	Bujingijila_TZ_FMNH205161	FMNH: 205161	2008	Male	Old adult	58.3	29.45	15.33	13	12.59	8.59	7.55	7.29	6.65	6.22	5.43	5.17	5.18	4.37	3.26	New [this study]			FMNH205161
	FMNH205162	Lophuromys machangui	aquilus										Yes	Yes	33.706	-9.11739	Bujingijila	TZ	Bujingijila_TZ_FMNH205162	FMNH: 205162	2008	Male	Old adult	56.05	28.99	15.24	12.68	12.7	8.2	6.97	7.19	6.92	6.2	5.16	5.34	4.89	3.59	2.93	New [this study]			FMNH205162
	FMNH205166	Lophuromys machangui	aquilus										Yes	Yes	33.706	-9.11739	Bujingijila	TZ	Bujingijila_TZ_FMNH205166	FMNH: 205166	2008	Female	Old adult	54.22	27.97	15.06	12.74	11.86	8.33	6.91	6.88	6.56	6.13	5.3	4.58	4.94	3.63	3.03	New [this study]			FMNH205166
	FMNH205170	Lophuromys machangui	aquilus										Yes	Yes	33.706	-9.11739	Bujingijila	TZ	Bujingijila_TZ_FMNH205170	FMNH: 205170	2008	Female	Old adult	56.28	28.87	14.56	12.45	11.98	8.89	6.79	6.79	6.69	6	5.36	5.06	4.79	4.27	3.15	New [this study]			FMNH205170
	FMNH205171	Lophuromys machangui	aquilus										Yes	Yes	33.706	-9.11739	Bujingijila	TZ	Bujingijila_TZ_FMNH205171	FMNH: 205171	2008	Male	Old adult	55.77	28.71	15.05	12.91	12.15	8.63	7.13	6.98	6.86	6.19	5.24	4.88	5.14	3.94	2.83	New [this study]			FMNH205171
	FMNH205285	Lophuromys machangui	aquilus	H_178	37	32	Yes	Yes		Yes	Yes		Yes	Yes	-8.99996	33.5619	Poroto	TZ	Poroto_TZ_FMNH205285	FMNH: 205285	2008	Female	Old adult	55.29	28.14	15.19	13.33	12.01	7.96	7.21	6.87	6.57	6.11	5.54	5.04	4.6	3.98	2.91	New [this study]			FMNH205285
	FMNH211553	Lophuromys machangui	aquilus				Yes	Yes	Yes				Yes	Yes	33.9824	-10.7445	Nyika	MW	Nyika_MW_FMNH211553	FMNH: 211553	2009	Male	Old adult	59.61	30.6	15.9	13.48	12.19	8.92	7.46	7.45	7.37	6.21	5.42	5.53	5.26	4.55	3.37	New [this study]			FMNH211553
	FMNH211555	Lophuromys machangui	aquilus										Yes	Yes	33.9824	-10.7445	Nyika	MW	Nyika_MW_FMNH211555	FMNH: 211555	2009	Female	Old adult	57.46	29.19	15.23	12.98	12.02	8.61	7.16	7.37	6.76	6.33	5.3	4.94	5.35	4.11	3.31	New [this study]			FMNH211555
	FMNH211643	Lophuromys machangui	aquilus	H_178	37	32	Yes	Yes			Yes		Yes	Yes	-10.5884	33.8112	Nyika	MW	Nyika_MW_FMNH211643	FMNH: 211643	2009	Female	Adult	58.74	30.3	15.09	12.71	13.02	8.71	7.45	7.2	6.52	6.24	5.34	4.95	4.84	4.72	3.51	New [this study]			FMNH211643
	FMNH211644	Lophuromys machangui	aquilus										Yes	Yes	33.8112	-10.5884	Nyika	MW	Nyika_MW_FMNH211644	FMNH: 211644	2009	Male	Adult	59.59	30.47	15.94	13.32	12.98	8.67	7.4	7.43	6.81	6.61	5.42	4.77	5.23	4.49	3.19	New [this study]			FMNH211644
	KY595850	Lophuromys machangui	aquilus	H_183	37	30	Yes								-15.9999	35.7235	Mulanje	MW	XC																				GenBank	KY595850		KY595850
	KY595850x	Lophuromys machangui	aquilus	H_183	37	30	Yes								-15.9999	35.7235	Mulanje	MW	Mulanje_MW_KY595850																				GenBank			KY595850x
	KY595851	Lophuromys machangui	aquilus	H_184	37	30	Yes			Yes					-15.9999	35.7235	Mulanje	MW	LXXXIX																				GenBank	KY595851		KY595851
	KY595851x	Lophuromys machangui	aquilus	H_184	37	30	Yes								-15.9999	35.7235	Mulanje	MW	Mulanje_MW_KY595851																				GenBank			KY595851x
	KY595852	Lophuromys machangui	aquilus	H_183	37	30	Yes								-15.9999	35.7235	Mulanje	MW	LXXXVIII																				GenBank	KY595852		KY595852
	KY595852x	Lophuromys machangui	aquilus	H_183	37	30	Yes								-15.9999	35.7235	Mulanje	MW	Mulanje_MW_KY595852																				GenBank			KY595852x
	KY595853	Lophuromys machangui	aquilus	H_174	37	47	Yes								-13.0334	33.485	Viphya	MW	Viphya_MW_KY595853																				GenBank	KY595853		KY595853
	KY595855	Lophuromys machangui	aquilus	H_174	37	47	Yes								-13.0334	33.485	Viphya	MW	LXXXVI																				GenBank	KY595855		KY595855
	KY595855x	Lophuromys machangui	aquilus	H_174	37	47	Yes								-13.0334	33.485	Viphya	MW	Viphya_MW_KY595855																				GenBank			KY595855x
	KY595856	Lophuromys machangui	aquilus	H_178	37	32	Yes								-10.5884	33.8112	Nyika	MW	Nyika_MW_KY595856																				GenBank	KY595856		KY595856
	KY595857	Lophuromys machangui	aquilus	H_178	37	32	Yes								-10.5884	33.8112	Nyika	MW	Nyika_MW_KY595857																				GenBank	KY595857		KY595857
	KY595858	Lophuromys machangui	aquilus	H_178	37	32	Yes			Yes					-10.5884	33.8112	Nyika	MW	KY595858																				GenBank	KY595858		KY595858
	KY595859	Lophuromys machangui	aquilus	H_178	37	32	Yes								-10.5884	33.8112	Nyika	MW	KY595859																				GenBank	KY595859		KY595859
	KY595860	Lophuromys machangui	aquilus	H_184	37	30	Yes								-16.3057	36.4241	Mabu	MZ	Mabu_MZ_KY595860																				GenBank	KY595860		KY595860
	KY595861	Lophuromys machangui	aquilus	H_184	37	30	Yes								-16.3057	36.4241	Mabu	MZ	KY595861																				GenBank	KY595861		KY595861
	KY595862	Lophuromys machangui	aquilus	H_185	37	30	Yes			Yes					-12.4011	35.4075	Jesi	MZ	LXXXII																				GenBank	KY595862		KY595862
	KY595862x	Lophuromys machangui	aquilus	H_185	37	30	Yes								-12.4011	35.4075	Jesi	MZ	Jesi_MZ_KY595862																				GenBank			KY595862x
	KY595863	Lophuromys machangui	aquilus	H_184	37	30	Yes								-12.4011	35.4075	Jesi	MZ	LXXXI																				GenBank	KY595863		KY595863
	KY595863x	Lophuromys machangui	aquilus	H_184	37	30	Yes								-12.4011	35.4075	Jesi	MZ	Jesi_MZ_KY595863																				GenBank			KY595863x
	KY595864	Lophuromys machangui	aquilus	H_185	37	30	Yes								-12.4011	35.4075	Jesi	MZ	LXXX																				GenBank	KY595864		KY595864
	KY595864x	Lophuromys machangui	aquilus	H_185	37	30	Yes								-12.4011	35.4075	Jesi	MZ	Jesi_MZ_KY595864																				GenBank			KY595864x
	KY595865	Lophuromys machangui	aquilus	H_183	37	30	Yes								-15.4454	36.9872	Gurue	MZ	Gurue_MZ_KY595865																				GenBank	KY595865		KY595865
	KY595866	Lophuromys machangui	aquilus	H_183	37	30	Yes			Yes					-15.4454	36.9872	Gurue	MZ	KY595866																				GenBank	KY595866		KY595866
	KY595876	Lophuromys machangui	aquilus	H_175	37	30	Yes			Yes					-7.76973	35.7285	Ulangambi	TZ	LXXI																				GenBank	KY595876		KY595876
	KY595876x	Lophuromys machangui	aquilus	H_175	37	30	Yes								-7.76973	35.7285	Ulangambi	TZ	Ulangambi_TZ_KY595876																				GenBank			KY595876x
	KY595885	Lophuromys machangui	aquilus	H_178	37	32	Yes			Yes					-9.0352	33.5711	Ngozi	TZ	LXIV																				GenBank	KY595885		KY595885
	KY595885x	Lophuromys machangui	aquilus	H_178	37	32	Yes								-8.99996	33.5619	Poroto	TZ	Poroto_TZ_KY595885																				GenBank			KY595885x
	KY595886	Lophuromys machangui	aquilus	H_178	37	32	Yes								-8.99996	33.5619	Poroto	TZ	Poroto_TZ_KY595886																				GenBank	KY595886		KY595886
	M8x0100	Lophuromys machangui	aquilus	H_184	37	30	Yes								-15.8489	35.7049	Mulanje	MW	M8x0100																				GenBank	KY595849		M8x0100
	M8x0283	Lophuromys machangui	aquilus	H_174	37	47	Yes								-13.0334	33.485	Viphya	MW	M8x0283																				GenBank	KY595853		M8x0283
	MH197068	Lophuromys machangui	aquilus	H_184	37	30	Yes								-16.3057	36.4241	Mabu	MZ	MH197068_MOZ135																				GenBank	MH197068		MH197068
	MOZ068	Lophuromys machangui	aquilus	H_184	37	30	Yes			Yes					-16.3057	36.4241	Mabu	MZ	MOZ068																				GenBank	MN616988		MOZ068
	RUCAx10882	Lophuromys machangui	aquilus	H_178	37	32	Yes			Yes					-8.37	35.22	Mufindi	TZ	RUCAx10882																				African Mammalia			RUCAx10882
	RUCAx5918	Lophuromys machangui	aquilus	H_172	37	30	Yes			Yes									RUCAx5918																				African Mammalia			RUCAx5918
	TA531	Lophuromys machangui	aquilus	H_178	37	32	Yes								-9.0352	33.5711	Ngozi	TZ	TA531																				GenBank	MN617012		TA531
	TM41752	Lophuromys machangui	aquilus	H_177	37	32	Yes			Yes					-10.5667	33.7979	Chelinda	MW	Chelinda_MW_TM41752																				African Mammalia			TM41752
	TZ30555	Lophuromys machangui	aquilus	H_175	37	30	Yes								-8.2531	35.2605	Mafinga	TZ	TZ30555																				Komarova et al., 2020			TZ30555
	TZ31001	Lophuromys machangui	aquilus	H_173	37	30	Yes								-9.8197	35.3519	Lilondo	TZ	TZ31001																				Komarova et al., 2020			TZ31001
	TZ31023	Lophuromys machangui	aquilus	H_173	37	30	Yes								-9.8383	35.3751	Lilondo	TZ	TZ31023																				Komarova et al., 2020			TZ31023
	FMNH210698	Lophuromys makundii	aquilus				Yes	Yes	Yes				Yes	Yes	35.6265	-3.69201	Manyara	TZ	Manyara_TZ_FMNH210698	FMNH: 210698	2010	Male	Young adult	52.58	26.85	14.43	12.75	11.16	7.46	6.53	6.35	6.05	5.88	5.19	4.71	4.45	3.86	2.72	New [this study]			FMNH210698
	FMNH210705	Lophuromys makundii	aquilus										Yes	Yes	35.6265	-3.69201	Manyara	TZ	Manyara_TZ_FMNH210705	FMNH: 210705	2010	Female	Old adult	54.64	27.93	14.75	12.08	11.85	7.99	6.88	6.63	6.16	5.97	5.56	4.92	5.12	4.18	3.05	New [this study]			FMNH210705
	FMNH210706	Lophuromys makundii	aquilus										Yes	Yes	35.6265	-3.69201	Manyara	TZ	Manyara_TZ_FMNH210706	FMNH: 210706	2010	Male	Adult	55.8	28.91	14.74	12.3	12.18	8.24	6.98	6.59	6.47	6.02	5.6	4.81	4.83	4.3	3.2	New [this study]			FMNH210706
	FMNH210712	Lophuromys makundii	aquilus										Yes	Yes	35.6265	-3.69201	Manyara	TZ	Manyara_TZ_FMNH210712	FMNH: 210712	2010	Male	Old adult	57.07	28.87	15.14	13.04	12.44	7.95	7.09	6.95	6	6.14	5.65	5.16	5.12	4.58	3.16	New [this study]			FMNH210712
	FMNH210717	Lophuromys makundii	aquilus										Yes	Yes	35.6265	-3.69201	Manyara	TZ	Manyara_TZ_FMNH210717	FMNH: 210717	2010	Female	Old adult	54.02	27.5	13.9	12.14	11.74	7.77	6.87	6.35	6.15	5.74	5.27	4.82	4.77	3.84	2.92	New [this study]			FMNH210717
	FMNH210719	Lophuromys makundii	aquilus										Yes	Yes	35.6265	-3.69201	Manyara	TZ	Manyara_TZ_FMNH210719	FMNH: 210719	2010	Male	Old adult	53.8	27.41	14.24	11.85	11.29	7.64	6.73	6.35	6.22	5.75	5.1	4.82	4.7	4.32	2.94	New [this study]			FMNH210719
	FMNH210720	Lophuromys makundii	aquilus										Yes	Yes	35.6265	-3.69201	Manyara	TZ	Manyara_TZ_FMNH210720	FMNH: 210720	2010	Female	Old adult	54.87	28.11	14.48	12.45	11.47	8.27	6.96	6.54	6.42	5.85	5.38	4.72	5.02	3.98	3.13	New [this study]			FMNH210720
	FMNH210729	Lophuromys makundii	aquilus										Yes	Yes	35.6265	-3.69201	Manyara	TZ	Manyara_TZ_FMNH210729	FMNH: 210729	2010	Male	Adult	56.15	28.75	14.54	12.45	12.13	8	6.99	6.67	6.1	6.11	5.36	5.11	4.94	4.23	2.9	New [this study]			FMNH210729
	FMNH210733	Lophuromys makundii	aquilus										Yes	Yes	35.6265	-3.69201	Manyara	TZ	Manyara_TZ_FMNH210733	FMNH: 210733	2010	Female	Old adult	57.75	29.23	15.2	12.45	12.7	8.08	6.82	6.81	5.95	5.97	5.7	5.05	4.89	4.43	3.11	New [this study]			FMNH210733
	FMNH210933	Lophuromys makundii	aquilus										Yes	Yes	35.5936	-3.76084	Manyara	TZ	Manyara_TZ_FMNH210933	FMNH: 210933	2010	Male	Old adult	56.51	28.92	15.52	12.85	12.53	8.35	7.31	6.6	6.06	6.36	5.72	4.49	4.96	4.41	3.28	New [this study]			FMNH210933
	FMNH210952	Lophuromys makundii	aquilus										Yes	Yes	35.5936	-3.76084	Manyara	TZ	Manyara_TZ_FMNH210952	FMNH: 210952	2010	Male	Adult	57.25	29.06	15.84	13.11	12.59	8.43	7.2	6.86	6.35	6.02	5.56	4.8	5.01	4.23	2.92	New [this study]			FMNH210952
	FMNH210962	Lophuromys makundii	aquilus										Yes	Yes	35.5936	-3.76084	Manyara	TZ	Manyara_TZ_FMNH210962	FMNH: 210962	2010	Male	Adult	54.11	28.03	13.99	12.23	11.91	7.9	6.98	6.4	6.34	6.07	5.5	4.81	4.87	4.01	3.04	New [this study]			FMNH210962
	FMNH211167	Lophuromys makundii	aquilus				Yes	Yes	Yes				Yes	Yes	35.6867	-3.14255	Ngorongoro	TZ	Ngorongoro_TZ_FMNH211167	FMNH: 211167	2010	Female	Adult	53.9	27.84	13.73	12.15	11.87	7.91	6.95	6.31	5.93	6	5.25	4.75	4.66	4.46	3.01	New [this study]			FMNH211167
	FMNH211177	Lophuromys makundii	aquilus										Yes	Yes	35.6867	-3.14255	Ngorongoro	TZ	Ngorongoro_TZ_FMNH211177	FMNH: 211177	2010	Female	Adult	54.25	27.73	14.5	12.47	11.69	7.9	6.9	6.55	6.26	6.05	5.3	4.81	4.68	4.03	2.96	New [this study]			FMNH211177
	FMNH211179	Lophuromys makundii	aquilus										Yes	Yes	35.6867	-3.14255	Ngorongoro	TZ	Ngorongoro_TZ_FMNH211179	FMNH: 211179	2010	Female	Adult	53.95	27.23	14.91	12.61	11.89	7.52	7.04	6.59	5.49	5.79	5.52	4.8	4.59	4.06	3.12	New [this study]			FMNH211179
	FMNH211184	Lophuromys makundii	aquilus										Yes	Yes	35.6867	-3.14255	Ngorongoro	TZ	Ngorongoro_TZ_FMNH211184	FMNH: 211184	2010	Male	Adult	55.7	28.34	14.42	12.21	11.73	8.1	7.03	6.23	6.31	5.68	5.39	5.02	4.51	4.53	3.13	New [this study]			FMNH211184
	FMNH211188	Lophuromys makundii	aquilus										Yes	Yes	35.6867	-3.14255	Ngorongoro	TZ	Ngorongoro_TZ_FMNH211188	FMNH: 211188	2010	Female	Old adult	54.6	27.65	14.7	12.49	11.91	7.54	6.89	6.79	5.78	5.74	5.3	4.86	4.76	4.41	3.08	New [this study]			FMNH211188
	FMNH211192	Lophuromys makundii	aquilus										Yes	Yes	35.6867	-3.14255	Ngorongoro	TZ	Ngorongoro_TZ_FMNH211192	FMNH: 211192	2010	Male	Adult	57.47	29.17	15.48	13.03	11.97	8.57	7.19	6.61	6.23	6.12	5.83	4.96	4.8	4.4	3.36	New [this study]			FMNH211192
	FMNH211197	Lophuromys makundii	aquilus										Yes	Yes	35.6867	-3.14255	Ngorongoro	TZ	Ngorongoro_TZ_FMNH211197	FMNH: 211197	2010	Female	Old adult	56.41	28.94	14.4	12.17	12.16	8.05	6.72	6.22	6.67	5.78	5.27	4.91	4.74	4.25	3.19	New [this study]			FMNH211197
	FMNH211198	Lophuromys makundii	aquilus										Yes		35.6867	-3.14255	Ngorongoro	TZ	Ngorongoro_TZ_FMNH211198	FMNH: 211198	2010	Female	Adult		28.27	14.8	12.27	11.88	7.75	6.99	6.17	6.15	5.81	5.65	4.94	4.57	4.43	3.06	New [this study]			FMNH211198
	FMNH211343	Lophuromys makundii	aquilus										Yes		35.6404	-3.14255	Ngorongoro	TZ	Ngorongoro_TZ_FMNH211343	FMNH: 211343	2010	Male	Old adult		29.34	14.93	12.77	12.26	8.52	7.14	6.57	6.23	6.23	5.54	5.01	4.79	4.49	3.04	New [this study]			FMNH211343
	FMNH211344	Lophuromys makundii	aquilus										Yes	Yes	35.6404	-3.14255	Ngorongoro	TZ	Ngorongoro_TZ_FMNH211344	FMNH: 211344	2010	Female	Old adult	55.4	28.31	14.7	12.12	11.78	8.03	7.21	6.78	6.61	5.96	5.43	4.68	4.61	3.9	2.99	New [this study]			FMNH211344
	FMNH210699	Lophuromys makundii	aquilus	H_191	25	39	Yes			Yes			Yes	Yes	-3.69201	35.6265	Manyara	TZ	Manyara_TZ_FMNH210699	FMNH: 210699	2010	Female	Adult	53.25	27.33	14.02	12.14	11.75	7.68	6.81	6.53	5.88	6.15	5.44	5.1	4.71	3.92	3.12	New [this study]			FMNH210699
	FMNH210704	Lophuromys makundii	aquilus	H_191	25	39	Yes	Yes	Yes	Yes	Yes	Yes	Yes	Yes	-3.69201	35.6265	Manyara	TZ	Manyara_TZ_FMNH210704	FMNH: 210704	2010	Male	Adult	54.21	28.07	14.62	12.51	11.67	7.87	6.87	6.46	6.44	6.03	5.3	4.72	4.62	4.12	3	New [this study]			FMNH210704
	FMNH210924	Lophuromys makundii	aquilus	H_191	25	39	Yes	Yes	Yes		Yes	Yes	Yes	Yes	-3.76084	35.5936	Manyara	TZ	Manyara_TZ_FMNH210924	FMNH: 210924	2010	Female	Old adult	57.94	29.55	15.58	12.91	12.42	8.51	7.31	6.88	6.63	6.14	5.71	4.79	5.23	4.27	3.18	New [this study]			FMNH210924
	FMNH210926	Lophuromys makundii	aquilus	H_191	25	39	Yes	Yes	Yes		Yes	Yes	Yes	Yes	-3.76084	35.5936	Manyara	TZ	Manyara_TZ_FMNH210926	FMNH: 210926	2010	Male	Adult	57.08	29.12	14.47	12.29	12.83	8.03	7.24	6.5	6.29	6.03	5.52	4.77	5.11	4.1	3.25	New [this study]			FMNH210926
	FMNH211161	Lophuromys makundii	aquilus	H_194	25	39	Yes	Yes	Yes	Yes	Yes	Yes	Yes	Yes	-3.14255	35.6867	Ngorongoro	TZ	Ngorongoro_TZ_FMNH211161	FMNH: 211161	2010	Female	Old adult	55.09	28.14	15.32	12.3	12.03	7.94	6.89	6.81	5.89	5.96	5.41	4.71	4.83	4.13	2.86	New [this study]			FMNH211161
	FMNH211168	Lophuromys makundii	aquilus	H_194	25	39	Yes	Yes		Yes	Yes		Yes	Yes	-3.14255	35.6867	Ngorongoro	TZ	Ngorongoro_TZ_FMNH211168	FMNH: 211168	2010	Female	Old adult	55.84	28.67	14.91	12.3	11.82	7.92	6.93	6.63	6.18	6.01	5.21	5.16	4.89	4.58	3.21	New [this study]			FMNH211168
	FMNH211172	Lophuromys makundii	aquilus	H_194	25	39	Yes	Yes	Yes		Yes	Yes	Yes	Yes	-3.14255	35.6867	Ngorongoro	TZ	Ngorongoro_TZ_FMNH211172	FMNH: 211172	2010	Male	Adult	56.06	28.41	14.55	11.96	11.64	7.78	7.2	6.38	6.2	5.68	5.6	4.88	4.6	4.83	3.16	New [this study]			FMNH211172
	FMNH211176	Lophuromys makundii	aquilus	H_195	25	39	Yes	Yes			Yes		Yes	Yes	-3.14255	35.6867	Ngorongoro	TZ	Ngorongoro_TZ_FMNH211176	FMNH: 211176	2010	Female	Old adult	57.54	29.14	15.3	13.03	11.95	8.61	7.05	6.6	6.49	5.89	5.72	4.91	5.02	4.89	3.23	New [this study]			FMNH211176
	Hap238	Lophuromys makundii	aquilus	H_191	25	39	Yes								-3.85672	35.5486	Mbulu	TZ	CCXXXVIII																				African Mammalia			Hap238
	Hap239	Lophuromys makundii	aquilus	H_191	25	39	Yes								-3.85672	35.5486	Mbulu	TZ	CCXXXIX																				African Mammalia			Hap239
	Hap240	Lophuromys makundii	aquilus	H_191	25	39	Yes								-3.85672	35.5486	Mbulu	TZ	CCXL																				African Mammalia			Hap240
	Hap241	Lophuromys makundii	aquilus	H_193	25	39	Yes								-3.85672	35.5486	Mbulu	TZ	CCXLI																				African Mammalia			Hap241
	KY595887	Lophuromys makundii	aquilus	H_194	25	39	Yes								-2.73382	36.2687	Kitumbeine	TZ	KY595887_TZ27539																				GenBank	KY595887		KY595887
	KY595888	Lophuromys makundii	aquilus	H_194	25	39	Yes								-2.73382	36.2687	Kitumbeine	TZ	KY595888_TZ27540																				GenBank	KY595888		KY595888
	KY595889	Lophuromys makundii	aquilus	H_194	25	39	Yes								-2.73382	36.2687	Kitumbeine	TZ	KY595889_TZ27583																				GenBank	KY595889		KY595889
	KY595890	Lophuromys makundii	aquilus	H_194	25	39	Yes								-2.73382	36.2687	Kitumbeine	TZ	KY595890_TZ27585																				GenBank	KY595890		KY595890
	KY595892	Lophuromys makundii	aquilus	H_194	25	39	Yes								-4.4872	35.398	Hanang	TZ	KY595892_TZ27929																				GenBank	KY595892		KY595892
	KY595893	Lophuromys makundii	aquilus	H_192	25	39	Yes								-4.4872	35.398	Hanang	TZ	KY595893_TZ27941																				GenBank	KY595893		KY595893
	TZ27929	Lophuromys makundii	aquilus	H_194	25	39	Yes								-4.4872	35.398	Hanang	TZ	TZ27929																				GenBank	KY595892		TZ27929
	TZ27941	Lophuromys makundii	aquilus	H_192	25	39	Yes								-4.4872	35.398	Hanang	TZ	TZ27941																				GenBank	KY595893		TZ27941
	CD2575	Lophuromys rita	aquilus	H_82	24	7	Yes			Yes					0.25	24.8333	Yaenero	CD	Yaenero_CD_2575																				African Mammalia			CD2575
	N27186	Lophuromys rita	aquilus	H_82	24	7	Yes			Yes									N27186																				African Mammalia			N27186
	R27601	Lophuromys rita	aquilus	H_82	24	7	Yes			Yes					-4.5013	15.2824	Yoko	CD	Yoko_CD_R27601																				African Mammalia			R27601
	RS0788	Lophuromys rita	aquilus	H_81	24	7	Yes			Yes					-11.2669	24.3166	Nchila	ZM	RS0788																				African Mammalia			RS0788
	Z2674	Lophuromys rita	aquilus	H_82	24	7	Yes			Yes					0.5364	25.2176	Kisangani	CD	Kisangani_CD_Z2674																				African Mammalia			Z2674
	ZA1549	Lophuromys rita	aquilus	H_82	24	7	Yes			Yes					-5.11	19.07	Ngome	CD	ZA1549																				Komarova et al., 2020			ZA1549
	FMNH171374	Lophuromys sabuni	aquilus	H_155	38	33	Yes	Yes	Yes	Yes	Yes	Yes	Yes	Yes	-7.875	31.6667	Mbizi	TZ	Mbizi_TZ_FMNH171374	FMNH: 171374	2001	Female	Adult	54.68	27.75	14.5	12.89	11.25	7.9	7.46	6.87	6.61	5.84	5.02	5	4.48	4.42	3.09	New [this study]			FMNH171374
	FMNH171382	Lophuromys sabuni	aquilus	H_154	38	33	Yes	Yes	Yes	Yes	Yes	Yes	Yes	Yes	-7.875	31.6667	Mbizi	TZ	Mbizi_TZ_FMNH171382	FMNH: 171382	2001	Female	Adult	56.51	28.77	14.38	12.92	11.91	8.51	7.66	6.74	6.63	6.11	5.78	5.06	4.73	4.7	3.28	New [this study]			FMNH171382
	FMNH171384	Lophuromys sabuni	aquilus										Yes	Yes	31.6667	-7.875	Mbizi	TZ	Mbizi_TZ_FMNH171384	FMNH: 171384	2001	Female	Old adult	57.34	29.26	14.52	12.59	12.44	8.32	7.42	7.04	6.74	6.01	5.51	5.29	4.81	4.72	3.14	New [this study]			FMNH171384
	FMNH171387	Lophuromys sabuni	aquilus	H_154	38	33	Yes	Yes		Yes	Yes	Yes	Yes	Yes	-7.875	31.6667	Mbizi	TZ	Mbizi_TZ_FMNH171387	FMNH: 171387	2001	Male	Old adult	57.01	29.3	15.1	13.15	12.25	8.35	7.1	7.05	6.33	6.07	5.11	4.92	5.07	4.65	3.07	New [this study]			FMNH171387
	FMNH171389	Lophuromys sabuni	aquilus										Yes	Yes	31.6667	-7.875	Mbizi	TZ	Mbizi_TZ_FMNH171389	FMNH: 171389	2001	Male	Old adult	58.01	29.77	14.21	12.84	12.97	8.82	7.23	6.93	6.5	5.99	5.2	5.17	4.84	4.46	3.09	New [this study]			FMNH171389
	FMNH171393	Lophuromys sabuni	aquilus										Yes	Yes	31.6667	-7.875	Mbizi	TZ	Mbizi_TZ_FMNH171393	FMNH: 171393	2001	Male	Young adult	56.12	28.74	14.35	12.6	11.77	8.11	7.41	6.84	6.92	5.95	5.33	5.05	4.76	4.09	3.2	New [this study]			FMNH171393
	FMNH171397	Lophuromys sabuni	aquilus						Yes				Yes	Yes	31.6694	-7.8639	Mbizi	TZ	Mbizi_TZ_FMNH171397	FMNH: 171397	2001	Male	Young adult	56.28	28.7	14.69	13.38	11.67	8.27	7.28	6.84	6.96	6.1	5.17	5.38	4.59	3.85	3.12	New [this study]			FMNH171397
	FMNH171399	Lophuromys sabuni	aquilus	H_154	38	33	Yes	Yes	Yes	Yes	Yes	Yes	Yes	Yes	-7.8639	31.6694	Mbizi	TZ	Mbizi_TZ_FMNH171399	FMNH: 171399	2001	Male	Adult	58.56	29.52	15.3	12.99	12.47	8.51	7.42	7.1	6.98	6.27	5.29	4.79	5.14	4.28	3.21	New [this study]			FMNH171399
	FMNH171400	Lophuromys sabuni	aquilus	H_156	38	33	Yes	Yes	Yes	Yes	Yes	Yes	Yes	Yes	-7.8639	31.6694	Mbizi	TZ	Mbizi_TZ_FMNH171400	FMNH: 171400	2001	Female	Old adult	58.25	29.85	15.11	12.91	12.51	8.78	7.45	7.15	7.31	6.04	5.53	5.32	5	3.99	3.01	New [this study]			FMNH171400
	FMNH171403	Lophuromys sabuni	aquilus										Yes	Yes	31.6694	-7.8639	Mbizi	TZ	Mbizi_TZ_FMNH171403	FMNH: 171403	2001	Male	Adult	57.19	29.17	14.87	13.27	11.95	8.44	7.38	7	6.76	6.25	5.26	5.26	4.76	4.41	3.32	New [this study]			FMNH171403
	FMNH171404	Lophuromys sabuni	aquilus										Yes	Yes	31.6694	-7.8639	Mbizi	TZ	Mbizi_TZ_FMNH171404	FMNH: 171404	2001	Male	Adult	57.93	29.38	14.76	13.2	12.27	8.46	7.24	7.14	6.58	6.17	5.49	5.32	4.96	4.79	3.21	New [this study]			FMNH171404
	FMNH171407	Lophuromys sabuni	aquilus										Yes	Yes	31.6694	-7.8639	Mbizi	TZ	Mbizi_TZ_FMNH171407	FMNH: 171407	2001	Female	Young adult	56.45	28.62	14.7	13.13	12.34	8.14	7.42	6.95	6.35	6.21	5.46	4.95	4.88	4.28	3.08	New [this study]			FMNH171407
	FMNH171410	Lophuromys sabuni	aquilus										Yes	Yes	31.6694	-7.8639	Mbizi	TZ	Mbizi_TZ_FMNH171410	FMNH: 171410	2001	Male	Young adult	55.81	28.78	14.28	12.43	12.4	8.17	7.23	6.84	6.87	6.02	5.23	5.11	4.79	4	3.28	New [this study]			FMNH171410
	FMNH171413	Lophuromys sabuni	aquilus										Yes		31.6694	-7.8639	Mbizi	TZ	Mbizi_TZ_FMNH171413	FMNH: 171413	2001	Male	Adult		28.4	14.64	12.8	11.86	7.98	7.33	6.82	6.31	5.87	5.39	5.14	4.94	4.34	3.1	New [this study]			FMNH171413
	FMNH171415	Lophuromys sabuni	aquilus										Yes	Yes	31.6694	-7.8639	Mbizi	TZ	Mbizi_TZ_FMNH171415	FMNH: 171415	2001	Male	Young adult	55.46	28.29	14.12	12.79	11.78	8.01	7.64	6.63	6.81	5.78	5.22	5.11	4.63	4.02	3	New [this study]			FMNH171415
	FMNH171419	Lophuromys sabuni	aquilus										Yes	Yes	31.6694	-7.8639	Mbizi	TZ	Mbizi_TZ_FMNH171419	FMNH: 171419	2001	Male	Old adult	59.89	30.81	15.07	13.09	13.3	9.08	7.49	7.37	7.08	6.48	5.58	5.28	5.16	4.54	3.28	New [this study]			FMNH171419
	FMNH177898	Lophuromys sabuni	aquilus										Yes		29.7535	-6.06618	Mahale	TZ	Mahale_TZ_FMNH177898	FMNH: 177898	2003	Male	Old adult		30.19	16.11	12.85	13	8.28	7.25	7.5	6.91	6.19	5.41	5.43	5.26	4.58	3.65	New [this study]			FMNH177898
	FMNH177901	Lophuromys sabuni	aquilus	H_157	39	33	Yes	Yes		Yes	Yes		Yes	Yes	-6.10433	29.779	Mahale	TZ	Mahale_TZ_FMNH177901	FMNH: 177901	2003	Female	Old adult	57.95	29.69	15.22	13.12	12.18	8.42	7.48	7.3	6.83	6.15	5.46	5.57	4.97	4.54	3.39	New [this study]			FMNH177901
	FMNH177902	Lophuromys sabuni	aquilus	H_158	39	33	Yes	Yes	Yes	Yes	Yes	Yes	Yes		-6.10433	29.779	Mahale	TZ	Mahale_TZ_FMNH177902	FMNH: 177902	2003	Male	Old adult		29.69	15.04	12.65	12	8.21	7.08	7.37	6.81	6.2	5.34	5.36	4.84	4.46	3.44	New [this study]			FMNH177902
	FMNH177904	Lophuromys sabuni	aquilus				Yes	Yes	Yes				Yes	Yes	29.7789	-6.10433	Mahale	TZ	Mahale_TZ_FMNH177904	FMNH: 177904	2003	Male	Adult	58.79	29.58	15.53	13.2	12.7	8.3	7.46	7.19	6.5	6.03	5.55	5.04	5.06	4.49	3.29	New [this study]			FMNH177904
	FMNH177905	Lophuromys sabuni	aquilus	H_158	39	33	Yes	Yes	Yes	Yes	Yes	Yes	Yes	Yes	-6.10433	29.779	Mahale	TZ	Mahale_TZ_FMNH177905	FMNH: 177905	2003	Female	Old adult	57.55	29.32	15.22	12.98	12.18	8.34	7.2	7.37	6.73	6.09	5.32	5.53	4.99	4.53	3.2	New [this study]			FMNH177905
	FMNH177907	Lophuromys sabuni	aquilus				Yes	Yes	Yes				Yes	Yes	29.7789	-6.10433	Mahale	TZ	Mahale_TZ_FMNH177907	FMNH: 177907	2003	Female	Adult	55.99	28.33	14.59	13.24	11.09	7.92	7.16	6.88	6.64	6.2	5.13	5.41	4.77	4.21	3.27	New [this study]			FMNH177907
	KY595867	Lophuromys sabuni	aquilus	H_154	38	33	Yes								-10.1072	30.9174	Chishimba	ZM	KY595867_NS1393																				GenBank	KY595867		KY595867
	KY595868	Lophuromys sabuni	aquilus	H_154	38	33	Yes			Yes					-10.1072	30.9174	Chishimba	ZM	KY595868_NS1411																				GenBank	KY595868		KY595868
	KY595869	Lophuromys sabuni	aquilus	H_154	38	33	Yes			Yes					-10.1072	30.9174	Chishimba	ZM	KY595869_NS1412																				GenBank	KY595869		KY595869
	KY595873	Lophuromys sabuni	aquilus	H_155	38	33	Yes								-7.52	31.4	Mbizi	TZ	KY595873_T8N444																				GenBank	KY595873		KY595873
	KY595875	Lophuromys sabuni	aquilus	H_154	38	33	Yes								-7.52	31.4	Mbizi	TZ	KY595875																				GenBank	KY595875		KY595875
	KY595884	Lophuromys sabuni	aquilus	H_154	38	33	Yes			Yes					-7.58993	31.2735	Ufipa	TZ	KY595884_TA464																				GenBank	KY595884		KY595884
	RUCAx13028	Lophuromys sabuni	aquilus	H_154	38	33	Yes								-7.52	31.4	Mbizi	TZ	RUCAx13028																				African Mammalia			RUCAx13028
	RUCAx13029	Lophuromys sabuni	aquilus	H_154	38	33	Yes								-7.52	31.4	Mbizi	TZ	RUCAx13029																				African Mammalia			RUCAx13029
	TZ13242	Lophuromys sabuni	aquilus	H_154	38	33	Yes								-7.5	31.4	Mbizi	TZ	13242_Mbizi_TZ																				Komarova et al., 2020			TZ13242
	EU349754	Lophuromys stanleyi	aquilus	H_95	33	25	Yes								0.3833	29.9333	Rwenzori	CD	EU349754_FMNH144777																				GenBank	EU349754		EU349754
	FMNH137520	Lophuromys stanleyi	aquilus										Yes	Yes	32.3005	-0.31419	Bugala	UG	Bugala_UG_FMNH137520	FMNH: 137520	1990	Male	Adult	59.18	29.9	15.91	13.24	12.7	8.56	7.53	7.23	6.58	6.52	5.61	4.79	4.96	4.4	2.95	New [this study]			FMNH137520
	FMNH137783	Lophuromys stanleyi	aquilus	H_89	33	25	Yes	Yes	Yes	Yes	Yes	Yes	Yes	Yes	-0.00528	32.2833	Bugala	UG	Bugala_UG_FMNH137783	FMNH: 137783	1990	Female	Young adult	52.43	26.82	14.69	12.44	11.66	7.41	7.07	6.72	5.64	5.84	5.39	4.8	4.58	3.81	2.84	New [this study]			FMNH137783
	FMNH137787	Lophuromys stanleyi	aquilus				Yes	Yes					Yes		32.2532	-0.36625	Bugala	UG	Bugala_UG_FMNH137787	FMNH: 137787	1990	Male	Young adult		27.89	14.66	12.61	12.01	7.54	7.07	6.78	6.06	6.12	5.41	4.81	4.66	4.03	3.17	New [this study]			FMNH137787
	FMNH137790	Lophuromys stanleyi	aquilus										Yes	Yes	32.3005	-0.31419	Bugala	UG	Bugala_UG_FMNH137790	FMNH: 137790	1990	Male	Young adult	55.35	27.92	15.07	12.8	11.96	7.77	7.37	6.72	6.14	6.18	5.32	4.72	4.77	4.15	2.98	New [this study]			FMNH137790
	FMNH144647	Lophuromys stanleyi	aquilus										Yes	Yes	30	0.35	Rwenzori	UG	Rwenzori_UG_FMNH144647	FMNH: 144647	1990	Male	Adult	53.32	27.11	14.31	12.44	11.62	7.78	6.93	6.76	6.04	6.4	5.14	4.46	5.01	3.45	3.08	New [this study]			FMNH144647
	FMNH144654	Lophuromys stanleyi	aquilus										Yes	Yes	30	0.3666	Rwenzori	UG	Rwenzori_UG_FMNH144654	FMNH: 144654	1990	Male	Adult	53.93	27.39	14.48	12.23	11.75	7.91	7.2	6.47	6.59	6.24	4.9	4.61	4.64	3.6	2.94	New [this study]			FMNH144654
	FMNH144664	Lophuromys stanleyi	aquilus										Yes	Yes	29.9833	0.3666	Rwenzori	UG	Rwenzori_UG_FMNH144664	FMNH: 144664	1990	Male	Young adult	52.14	26.78	13.77	12.5	11.69	7.29	6.99	6.21	5.73	5.94	5.21	4.61	4.54	4.18	2.68	New [this study]			FMNH144664
	FMNH144666	Lophuromys stanleyi	aquilus										Yes	Yes	29.9833	0.3666	Rwenzori	UG	Rwenzori_UG_FMNH144666	FMNH: 144666	1990	Female	Adult	53.96	27.75	14.5	12.72	11.64	8.11	7.26	6.63	6.71	6.16	5.62	4.58	4.72	3.34	3.04	New [this study]			FMNH144666
	FMNH144678	Lophuromys stanleyi	aquilus										Yes	Yes	29.9833	0.3666	Rwenzori	UG	Rwenzori_UG_FMNH144678	FMNH: 144678	1990	Female	Young adult	54.02	27.46	14.86	12.79	11.16	7.67	7.28	6.68	5.8	6.21	5.52	4.98	4.88	4.12	3	New [this study]			FMNH144678
	FMNH144684	Lophuromys stanleyi	aquilus										Yes	Yes	29.9833	0.3666	Rwenzori	UG	Rwenzori_UG_FMNH144684	FMNH: 144684	1990	Female	Young adult	55.27	28.15	14.62	12.87	12.08	7.93	7.44	6.65	6.25	6.34	5.6	4.76	5.18	3.8	3.05	New [this study]			FMNH144684
	FMNH144688	Lophuromys stanleyi	aquilus										Yes	Yes	29.9833	0.3666	Rwenzori	UG	Rwenzori_UG_FMNH144688	FMNH: 144688	1990	Male	Old adult	57.73	29.21	15.54	12.89	12.8	8.42	7.1	6.98	6.53	6.16	5.64	4.97	5.14	4.05	3.67	New [this study]			FMNH144688
	FMNH144690	Lophuromys stanleyi	aquilus										Yes	Yes	29.9833	0.3666	Rwenzori	UG	Rwenzori_UG_FMNH144690	FMNH: 144690	1990	Male	Young adult	53.43	27.17	14.8	12.66	11.43	7.72	7.1	6.72	6.36	6.1	5.22	4.61	4.83	3.92	3.07	New [this study]			FMNH144690
	FMNH144702	Lophuromys stanleyi	aquilus										Yes	Yes	29.9833	0.3666	Rwenzori	UG	Rwenzori_UG_FMNH144702	FMNH: 144702	1990	Female	Young adult	53.99	26.9	14.27	12.97	11.61	7.23	7.32	6.69	5.88	6.03	5.67	4.91	4.92	4.02	3.15	New [this study]			FMNH144702
	FMNH144719	Lophuromys stanleyi	aquilus										Yes	Yes	29.9833	0.3666	Rwenzori	UG	Rwenzori_UG_FMNH144719	FMNH: 144719	1990	Male	Old adult	54.24	27.55	14.55	12.22	11.81	7.92	7.14	6.83	6.28	6.14	5.3	4.63	4.84	3.67	3.13	New [this study]			FMNH144719
	FMNH144742	Lophuromys stanleyi	aquilus										Yes		29.9833	0.3666	Rwenzori	UG	Rwenzori_UG_FMNH144742	FMNH: 144742	1991	Female	Adult		26.97	14.49	12.7	11.91	7.65	6.94	6.61	6.03	6.19	5.34	4.67	4.55	3.67	2.81	New [this study]			FMNH144742
	FMNH144750	Lophuromys stanleyi	aquilus										Yes	Yes	29.9833	0.3666	Rwenzori	UG	Rwenzori_UG_FMNH144750	FMNH: 144750	1991	Male	Adult	54.65	27.82	14.81	12.42	11.94	7.77	7.26	6.39	5.59	6.05	5.6	4.49	4.65	4.25	3.02	New [this study]			FMNH144750
	FMNH144751	Lophuromys stanleyi	aquilus										Yes	Yes	29.9833	0.3666	Rwenzori	UG	Rwenzori_UG_FMNH144751	FMNH: 144751	1991	Male	Young adult	53.2	27.16	13.79	12.23	11.23	7.89	6.94	6.3	5.79	6.66	5.12	4.55	4.63	4.09	3.11	New [this study]			FMNH144751
	FMNH144754	Lophuromys stanleyi	aquilus										Yes	Yes	29.9833	0.3666	Rwenzori	UG	Rwenzori_UG_FMNH144754	FMNH: 144754	1991	Male	Adult	54.81	27.95	15.05	13.06	11.8	7.84	7.57	6.79	5.71	6.46	5.35	4.64	4.85	4.27	3.11	New [this study]			FMNH144754
	FMNH144755	Lophuromys stanleyi	aquilus										Yes	Yes	29.9833	0.3666	Rwenzori	UG	Rwenzori_UG_FMNH144755	FMNH: 144755	1991	Male	Adult	54.48	27.63	14.64	12.55	11.67	8.1	7.5	6.67	5.93	6.31	5.45	4.71	5.03	4.07	2.95	New [this study]			FMNH144755
	FMNH144757	Lophuromys stanleyi	aquilus	H_88	33	25	Yes			Yes					0.3833	29.9333	Rwenzori	CD	Rwenzori_CD_FMNH144757																				New [this study]			FMNH144757
	FMNH144775	Lophuromys stanleyi	aquilus				Yes						Yes	Yes	29.9333	0.3833	Rwenzori	UG	Rwenzori_UG_FMNH144775	FMNH: 144775	1991	Male	Old adult	54.22	27.41	14.88	13.07	10.92	8.07	6.96	6.79	6.06	6.82	4.98	4.61	4.63	4.73	2.76	New [this study]			FMNH144775
	FMNH144776	Lophuromys stanleyi	aquilus										Yes	Yes	29.9333	0.3833	Rwenzori	UG	Rwenzori_UG_FMNH144776	FMNH: 144776	1991	Male	Adult	54.13	27.57	14.48	12.9	10.82	8.12	7.31	6.52	6.14	6.38	5.34	4.6	4.79	4.44	2.87	New [this study]			FMNH144776
	FMNH144778	Lophuromys stanleyi	aquilus										Yes		29.9333	0.3833	Rwenzori	UG	Rwenzori_UG_FMNH144778	FMNH: 144778	1991	Female	Adult		26.98	14.43	13.02	11.51	7.86	7.36	6.39	6.11	6.31	5.33	4.36	4.32	4.28	2.98	New [this study]			FMNH144778
	FMNH144783	Lophuromys stanleyi	aquilus										Yes	Yes	29.9333	0.3833	Rwenzori	UG	Rwenzori_UG_FMNH144783	FMNH: 144783	1991	Male	Young adult	52.98	27.08	14.21	12.78	11.26	7.46	7.22	6.29	5.65	6.14	5.3	4.62	4.46	4.77	2.69	New [this study]			FMNH144783
	FMNH144794	Lophuromys stanleyi	aquilus										Yes	Yes	29.8833	0.3833	Rwenzori	UG	Rwenzori_UG_FMNH144794	FMNH: 144794	1991	Male	Old adult	55.42	28.17	14.8	12.3	12.27	8.54	7	6.49	5.99	6.21	5.52	4.09	4.61	4.52	2.73	New [this study]			FMNH144794
	FMNH144799	Lophuromys stanleyi	aquilus										Yes	Yes	29.8833	0.3833	Rwenzori	UG	Rwenzori_UG_FMNH144799	FMNH: 144799	1991	Female	Adult	53.01	27	14.02	12.46	11.43	8.14	7.11	6.34	5.67	6.28	5.46	4.11	4.69	4.35	2.93	New [this study]			FMNH144799
	FMNH144800	Lophuromys stanleyi	aquilus										Yes	Yes	29.8833	0.3833	Rwenzori	UG	Rwenzori_UG_FMNH144800	FMNH: 144800	1991	Female	Young adult	50.89	25.94	13.21	12.51	10.7	7.35	7.03	6.09	5.69	6.19	5.58	4.34	4.35	4	2.74	New [this study]			FMNH144800
	FMNH144801	Lophuromys stanleyi	aquilus										Yes	Yes	29.8833	0.3833	Rwenzori	UG	Rwenzori_UG_FMNH144801	FMNH: 144801	1991	Female	Young adult	51.41	26.01	14.05	12.81	10.69	7.44	7.15	6.29	5.64	6.11	5.14	4.32	4.55	4.05	2.8	New [this study]			FMNH144801
	FMNH144805	Lophuromys stanleyi	aquilus										Yes	Yes	29.8833	0.3833	Rwenzori	UG	Rwenzori_UG_FMNH144805	FMNH: 144805	1991	Female	Young adult	52.21	26.7	14.24	12.6	11.11	7.92	7.38	6.4	5.64	6.19	5.17	4.19	4.62	3.98	2.83	New [this study]			FMNH144805
	FMNH144809	Lophuromys stanleyi	aquilus										Yes	Yes	29.8833	0.3833	Rwenzori	UG	Rwenzori_UG_FMNH144809	FMNH: 144809	1991	Male	Old adult	53.85	27.43	15.07	13.14	11.5	8.3	7.18	6.74	6.12	6.4	5.53	4.32	4.74	4.15	2.99	New [this study]			FMNH144809
	FMNH144810	Lophuromys stanleyi	aquilus										Yes	Yes	29.8833	0.3833	Rwenzori	UG	Rwenzori_UG_FMNH144810	FMNH: 144810	1991	Female	Young adult	51.86	26.21	13.38	12.42	11.23	7.66	7.23	6.37	5.65	5.96	4.95	4.16	4.58	4.08	2.95	New [this study]			FMNH144810
	FMNH144812	Lophuromys stanleyi	aquilus										Yes	Yes	29.8833	0.3833	Rwenzori	UG	Rwenzori_UG_FMNH144812	FMNH: 144812	1991	Male	Old adult	55.62	28.3	14.77	13.2	12.42	8.24	7.44	6.66	6.04	6.28	5.38	4.34	4.68	4.15	3.01	New [this study]			FMNH144812
	FMNH149749	Lophuromys stanleyi	aquilus										Yes	Yes	32.4982	-0.43958	Bukasa	UG	Bukasa_UG_FMNH149749	FMNH: 149749	1990	Male	Young adult	56.26	29.01	14.62	13.16	12.3	8.3	7.14	6.79	6.49	6.25	5.57	4.93	5.06	4.33	3.04	New [this study]			FMNH149749
	FMNH149750	Lophuromys stanleyi	aquilus										Yes	Yes	32.4982	-0.43958	Bukasa	UG	Bukasa_UG_FMNH149750	FMNH: 149750	1990	Female	Adult	59.21	29.98	15.55	13.32	13.09	8.67	7.41	7.3	6.87	6.48	5.49	5.11	5.1	4.05	3.12	New [this study]			FMNH149750
	FMNH149754	Lophuromys stanleyi	aquilus										Yes	Yes	32.04	-0.31739	Bukakata	UG	Bukakata_UG_FMNH149754	FMNH: 149754	1990	Female	Young adult	54.74	27.72	14.63	12.88	11.32	7.93	7.19	6.94	6.43	5.95	5.26	4.92	4.83	3.89	3.25	New [this study]			FMNH149754
	FMNH149755	Lophuromys stanleyi	aquilus										Yes	Yes	32.04	-0.31739	Bukakata	UG	Bukakata_UG_FMNH149755	FMNH: 149755	1990	Female	Old adult	55.83	28.45	14.7	12.54	11.8	8.28	7.1	7.01	6.23	6.15	5.1	4.84	5.11	4.12	3.64	New [this study]			FMNH149755
	FMNH149757	Lophuromys stanleyi	aquilus										Yes		32.04	-0.31739	Bukakata	UG	Bukakata_UG_FMNH149757	FMNH: 149757	1990	Female	Old adult		29.29	14.85	12.91	12.76	7.98	6.93	7.07	6.49	6.23	5.34	4.83	4.81	3.96	3.14	New [this study]			FMNH149757
	FMNH149758	Lophuromys stanleyi	aquilus										Yes	Yes	32.04	-0.31739	Bukakata	UG	Bukakata_UG_FMNH149758	FMNH: 149758	1990	Male	Adult	56.14	28.39	15.16	12.79	11.87	8.02	6.92	7.25	6.45	6.18	5.42	4.97	5.18	3.79	2.99	New [this study]			FMNH149758
	FMNH149760	Lophuromys stanleyi	aquilus										Yes	Yes	32.04	-0.31739	Bukakata	UG	Bukakata_UG_FMNH149760	FMNH: 149760	1990	Male	Old adult	56.73	29.17	14.59	12.52	12.4	8.2	6.85	7.01	6.56	5.95	4.94	5.15	5	4.3	3.41	New [this study]			FMNH149760
	FMNH149762	Lophuromys stanleyi	aquilus										Yes	Yes	32.04	-0.31739	Bukakata	UG	Bukakata_UG_FMNH149762	FMNH: 149762	1990	Male	Adult	57.88	29.34	15.33	13.1	12.34	8.03	6.92	6.96	6.56	6.17	4.94	4.88	4.9	4.15	3.15	New [this study]			FMNH149762
	FMNH149763	Lophuromys stanleyi	aquilus										Yes	Yes	32.04	-0.31739	Bukakata	UG	Bukakata_UG_FMNH149763	FMNH: 149763	1990	Female	Adult	55.59	28.3	14.34	12.58	11.62	8.38	6.88	6.91	6.41	6.37	5.27	4.66	4.93	4.38	3.41	New [this study]			FMNH149763
	FMNH149777	Lophuromys stanleyi	aquilus										Yes	Yes	32.04	-0.31739	Bukakata	UG	Bukakata_UG_FMNH149777	FMNH: 149777	1990	Male	Young adult	55.08	28.02	14.3	12.6	11.8	7.98	7.13	6.83	6.22	6.01	5	4.91	4.77	4.06	3.13	New [this study]			FMNH149777
	FMNH149779	Lophuromys stanleyi	aquilus										Yes	Yes	32.04	-0.31739	Bukakata	UG	Bukakata_UG_FMNH149779	FMNH: 149779	1990	Male	Old adult	55.78	28.41	14.16	12.26	12.58	7.9	6.94	6.64	6.29	5.81	4.91	4.91	4.67	3.81	3.21	New [this study]			FMNH149779
	FMNH149780	Lophuromys stanleyi	aquilus										Yes	Yes	32.04	-0.31739	Bukakata	UG	Bukakata_UG_FMNH149780	FMNH: 149780	1990	Female	Adult	54.32	27.5	13.77	12.07	11.78	7.87	6.71	6.65	6.16	5.84	4.94	4.63	4.78	3.83	2.61	New [this study]			FMNH149780
	FMNH149781	Lophuromys stanleyi	aquilus										Yes	Yes	32.04	-0.31739	Bukakata	UG	Bukakata_UG_FMNH149781	FMNH: 149781	1990	Male	Adult	54.99	28.46	14.27	12.66	11.86	8.39	7.05	6.37	6.62	5.73	5.31	4.84	4.73	4.08	2.9	New [this study]			FMNH149781
	FMNH149788	Lophuromys stanleyi	aquilus										Yes	Yes	32.04	-0.31739	Bukakata	UG	Bukakata_UG_FMNH149788	FMNH: 149788	1990	Male	Old adult	55.25	28.04	15.34	13.11	11.72	8.12	6.67	7.03	6.36	5.9	5.38	4.71	4.62	4.4	3.13	New [this study]			FMNH149788
	FMNH149790	Lophuromys stanleyi	aquilus										Yes	Yes	32.04	-0.31739	Bukakata	UG	Bukakata_UG_FMNH149790	FMNH: 149790	1990	Male	Adult	56.28	28.58	14.84	12.64	12.4	8.31	7.31	6.77	6.45	6.02	5.52	4.96	4.56	3.86	3.11	New [this study]			FMNH149790
	FMNH149791	Lophuromys stanleyi	aquilus										Yes	Yes	32.04	-0.31739	Bukakata	UG	Bukakata_UG_FMNH149791	FMNH: 149791	1990	Female	Old adult	56.25	28.37	14.48	12.36	12.38	8.39	6.81	6.92	7.02	5.61	5.29	4.67	4.75	3.5	3.37	New [this study]			FMNH149791
	FMNH149797	Lophuromys stanleyi	aquilus										Yes	Yes	32.04	-0.31739	Bukakata	UG	Bukakata_UG_FMNH149797	FMNH: 149797	1990	Female	Adult	54.28	27.56	14.62	12.82	11.32	7.93	6.76	6.87	6.28	6.23	5.25	4.61	4.81	4.05	3.25	New [this study]			FMNH149797
	FMNH149802	Lophuromys stanleyi	aquilus										Yes	Yes	32.04	-0.31739	Bukakata	UG	Bukakata_UG_FMNH149802	FMNH: 149802	1990	Male	Old adult	57.79	28.77	15.24	12.62	11.92	8.2	6.77	6.87	6.63	6.28	5.64	4.85	5.12	4.42	3.3	New [this study]			FMNH149802
	FMNH149805	Lophuromys stanleyi	aquilus										Yes		31.3616	1.42629	Hoima	UG	Hoima_UG_FMNH149805	FMNH: 149805	1990	Female	Old adult		29.56	14.44	12.96	12.7	8.65	7.24	7.39	6.29	6.23	5.51	4.7	5.44	3.87	3.27	New [this study]			FMNH149805
	FMNH149806	Lophuromys stanleyi	aquilus										Yes	Yes	31.3616	1.42629	Hoima	UG	Hoima_UG_FMNH149806	FMNH: 149806	1990	Female	Young adult	55.33	28.06	14.71	13.05	11.88	7.84	6.89	6.89	6.34	5.89	5.12	4.87	4.83	4.06	2.93	New [this study]			FMNH149806
	FMNH149807	Lophuromys stanleyi	aquilus										Yes	Yes	31.3616	1.42629	Hoima	UG	Hoima_UG_FMNH149807	FMNH: 149807	1990	Male	Young adult	51	25.86	13.45	12	10.86	7	6.96	6.48	6.09	5.48	4.95	4.89	4.41	3.68	2.78	New [this study]			FMNH149807
	FMNH149808	Lophuromys stanleyi	aquilus										Yes	Yes	31.3616	1.42629	Hoima	UG	Hoima_UG_FMNH149808	FMNH: 149808	1990	Female	Adult	57.23	28.97	14.77	12.67	12.48	8.04	7.09	6.98	6.5	6.06	5.2	4.84	5.09	4	3.15	New [this study]			FMNH149808
	FMNH157531	Lophuromys stanleyi	aquilus	H_107	33	31	Yes			Yes					-1.3833	29.65	Mgahinga	UG	Mgahinga_UG_FMNH157531																				New [this study]			FMNH157531
	FMNH157535	Lophuromys stanleyi	aquilus	H_83	33	25	Yes								-1.3833	29.65	Mgahinga	UG	Mgahinga_UG_FMNH157535																				New [this study]			FMNH157535
	FMNH157549	Lophuromys stanleyi	aquilus				Yes						Yes	Yes	29.65	-1.3833	Mgahinga	UG	Mgahinga_UG_FMNH157549	FMNH: 157549	1996	Male	Adult	53.77	27.02	14.42	12.74	10.96	7.36	7	6.54	5.81	6.05	5.68	4.96	4.5	4.38	2.72	New [this study]			FMNH157549
	FMNH157563	Lophuromys stanleyi	aquilus										Yes	Yes	29.65	-1.3833	Mgahinga	UG	Mgahinga_UG_FMNH157563	FMNH: 157563	1996	Male	Young adult	53.87	27.41	14.05	12.91	11.67	7.55	7.03	6.53	6.25	6.15	5.09	4.83	4.74	3.77	2.7	New [this study]			FMNH157563
	FMNH157565	Lophuromys stanleyi	aquilus										Yes	Yes	29.65	-1.3833	Mgahinga	UG	Mgahinga_UG_FMNH157565	FMNH: 157565	1996	Female	Old adult	55.11	28.05	14.98	12.82	12.02	7.77	6.74	6.71	5.92	6.31	5.58	4.68	4.78	4.3	3.17	New [this study]			FMNH157565
	FMNH157571	Lophuromys stanleyi	aquilus										Yes	Yes	29.65	-1.3833	Mgahinga	UG	Mgahinga_UG_FMNH157571	FMNH: 157571	1996	Male	Old adult	54.43	27.62	15	12.96	11.6	7.76	7.02	6.85	6.08	6.14	5.07	4.75	4.81	3.87	2.89	New [this study]			FMNH157571
	FMNH157575	Lophuromys stanleyi	aquilus										Yes	Yes	29.65	-1.3833	Mgahinga	UG	Mgahinga_UG_FMNH157575	FMNH: 157575	1996	Male	Old adult	54.42	28.02	14.85	13.02	12.26	7.83	7.32	6.55	6.05	6.47	5.36	4.69	4.67	4.03	2.9	New [this study]			FMNH157575
	FMNH157576	Lophuromys stanleyi	aquilus										Yes	Yes	29.65	-1.3833	Mgahinga	UG	Mgahinga_UG_FMNH157576	FMNH: 157576	1996	Female	Adult	54.43	27.37	14.35	12.48	11.51	7.56	6.85	6.5	5.86	6.16	5.44	4.7	4.81	4.39	2.74	New [this study]			FMNH157576
	FMNH157584	Lophuromys stanleyi	aquilus										Yes	Yes	29.65	-1.3833	Mgahinga	UG	Mgahinga_UG_FMNH157584	FMNH: 157584	1996	Female	Old adult	52.7	26.91	14.14	12.31	11.26	7.84	6.72	6.54	6.12	5.81	5.24	4.64	4.53	3.85	2.79	New [this study]			FMNH157584
	FMNH157587	Lophuromys stanleyi	aquilus										Yes	Yes	29.65	-1.3833	Mgahinga	UG	Mgahinga_UG_FMNH157587	FMNH: 157587	1996	Female	Old adult	54.54	27.95	14.57	12.39	12.01	7.77	7.16	6.51	6.45	6.01	5.83	4.93	4.62	3.6	2.64	New [this study]			FMNH157587
	FMNH157596	Lophuromys stanleyi	aquilus										Yes	Yes	29.65	-1.3833	Mgahinga	UG	Mgahinga_UG_FMNH157596	FMNH: 157596	1996	Female	Young adult	51.22	26.57	14.39	13.02	11.14	7.18	7.22	6.38	5.99	6.12	5.46	5.11	4.49	3.92	2.84	New [this study]			FMNH157596
	FMNH157597	Lophuromys stanleyi	aquilus										Yes	Yes	29.65	-1.3833	Mgahinga	UG	Mgahinga_UG_FMNH157597	FMNH: 157597	1996	Male	Adult	53.18	27.57	14.59	13.12	11.48	8	6.96	6.74	6.24	6.31	5.32	4.91	4.6	4.11	2.68	New [this study]			FMNH157597
	FMNH157611	Lophuromys stanleyi	aquilus										Yes	Yes	29.65	-1.3667	Mgahinga	UG	Mgahinga_UG_FMNH157611	FMNH: 157611	1996	Male	Old adult	54.71	27.72	15.31	12.84	12.31	7.81	7.25	6.92	6.02	6.31	5.44	4.83	4.95	3.97	2.83	New [this study]			FMNH157611
	FMNH157615	Lophuromys stanleyi	aquilus										Yes	Yes	29.65	-1.3667	Mgahinga	UG	Mgahinga_UG_FMNH157615	FMNH: 157615	1996	Male	Adult	55.85	28.03	15.23	13.12	11.86	7.63	7.37	6.77	6.25	6.25	5.37	4.93	4.8	4.09	3	New [this study]			FMNH157615
	FMNH157618	Lophuromys stanleyi	aquilus	H_86	33	25	Yes						Yes	Yes	-1.3833	29.65	Mgahinga	UG	Mgahinga_UG_FMNH157618	FMNH: 157618	1996	Male	Old adult	54.55	28.14	14.53	12.86	11.6	7.78	7.26	6.85	6.49	6.25	5.5	5.16	4.64	3.82	2.89	New [this study]			FMNH157618
	FMNH157623	Lophuromys stanleyi	aquilus										Yes	Yes	29.65	-1.3667	Mgahinga	UG	Mgahinga_UG_FMNH157623	FMNH: 157623	1996	Female	Old adult	53.99	27.37	15.27	12.96	11.82	7.96	7.24	6.93	6.19	6.43	5.52	4.49	5.22	3.75	3.01	New [this study]			FMNH157623
	FMNH157624	Lophuromys stanleyi	aquilus										Yes	Yes	29.65	-1.3667	Mgahinga	UG	Mgahinga_UG_FMNH157624	FMNH: 157624	1996	Female	Old adult	55.74	28.63	14.58	12.38	12.01	8.12	6.85	6.91	6.14	6	5.5	4.8	4.82	4.47	3.07	New [this study]			FMNH157624
	FMNH157628	Lophuromys stanleyi	aquilus										Yes	Yes	29.65	-1.3667	Mgahinga	UG	Mgahinga_UG_FMNH157628	FMNH: 157628	1996	Male	Adult	55.56	28.33	14.7	12.76	12.32	8.03	7.31	6.82	6.22	6.04	5.54	4.75	4.77	4.14	2.85	New [this study]			FMNH157628
	FMNH157629	Lophuromys stanleyi	aquilus										Yes	Yes	29.65	-1.3667	Mgahinga	UG	Mgahinga_UG_FMNH157629	FMNH: 157629	1996	Female	Old adult	53.66	27.54	14.28	12.39	11.72	7.94	6.81	6.95	5.94	6.15	5.73	4.62	4.53	4.16	2.83	New [this study]			FMNH157629
	FMNH157636	Lophuromys stanleyi	aquilus	H_84	33	25	Yes			Yes					-1.3833	29.65	Mgahinga	UG	Mgahinga_UG_FMNH157636																				New [this study]			FMNH157636
	FMNH157913	Lophuromys stanleyi	aquilus	H_90	33	25	Yes			Yes			Yes	Yes	-1.0333	29.7667	Bwindi	UG	Bwindi_UG_FMNH157913	FMNH: 157913	1996	Male	Adult	54.51	27.8	14.39	12.53	12.01	8.28	6.94	6.67	6.78	6.07	5.35	4.65	4.7	3.52	3.21	New [this study]			FMNH157913
	FMNH157914	Lophuromys stanleyi	aquilus	H_91	33	25	Yes			Yes			Yes	Yes	-1.0333	29.7667	Bwindi	UG	Bwindi_UG_FMNH157914	FMNH: 157914	1996	Male	Adult	54.08	27.95	14.49	12.85	11.65	7.8	7.23	6.45	6.32	6.28	5.56	5.01	4.3	3.88	2.94	New [this study]			FMNH157914
	FMNH160592	Lophuromys stanleyi	aquilus										Yes	Yes	29.6179	-0.98701	Bwindi	UG	Bwindi_UG_FMNH160592	FMNH: 160592	1997	Female	Adult	55.44	28.36	14.82	12.61	12.12	7.86	6.86	6.97	6.03	5.99	5	4.83	4.95	4.27	3.2	New [this study]			FMNH160592
	FMNH160595	Lophuromys stanleyi	aquilus										Yes		29.6179	-0.98701	Bwindi	UG	Bwindi_UG_FMNH160595	FMNH: 160595	1997	Male	Adult		27.89	14.76	13.06	12.41	7.54	7.19	6.61	6.04	6.17	5.4	4.65	4.36	3.76	2.83	New [this study]			FMNH160595
	FMNH160597	Lophuromys stanleyi	aquilus										Yes	Yes	29.6179	-0.98701	Bwindi	UG	Bwindi_UG_FMNH160597	FMNH: 160597	1997	Male	Adult	53.38	26.99	14.23	12.52	11.43	7.72	6.94	6.81	5.94	6.1	5.39	4.53	4.83	4.27	2.81	New [this study]			FMNH160597
	FMNH160598	Lophuromys stanleyi	aquilus										Yes		29.6179	-0.98701	Bwindi	UG	Bwindi_UG_FMNH160598	FMNH: 160598	1997	Female	Adult		28.74	15.5	13.66	12.71	7.98	7.3	7.35	6.87	6.36	5.53	4.94	5.36	3.84	3.16	New [this study]			FMNH160598
	FMNH160600	Lophuromys stanleyi	aquilus	H_91	33	25	Yes						Yes	Yes	-1.0333	29.7667	Bwindi	UG	Bwindi_UG_FMNH160600	FMNH: 160600	1997	Male	Adult	55.97	28.83	15.11	13.12	12.25	8.04	7.28	7.1	6.24	6.34	5.36	5.2	4.88	3.86	2.9	New [this study]			FMNH160600
	FMNH160606	Lophuromys stanleyi	aquilus										Yes	Yes	29.6179	-0.98701	Bwindi	UG	Bwindi_UG_FMNH160606	FMNH: 160606	1997	Male	Young adult	54.98	28.19	14.51	12.95	12.32	7.93	6.93	6.55	6.42	5.85	5.44	4.82	4.8	3.75	2.82	New [this study]			FMNH160606
	FMNH160607	Lophuromys stanleyi	aquilus										Yes	Yes	29.6179	-0.98701	Bwindi	UG	Bwindi_UG_FMNH160607	FMNH: 160607	1997	Female	Adult	57.12	29.13	15.42	13.47	12.35	8.34	7.53	6.92	6.11	6.54	5.65	4.8	4.96	4.33	2.94	New [this study]			FMNH160607
	FMNH160608	Lophuromys stanleyi	aquilus										Yes	Yes	29.6179	-0.98701	Bwindi	UG	Bwindi_UG_FMNH160608	FMNH: 160608	1997	Male	Adult	53.7	27.41	14.5	12.9	12.17	7.58	6.74	6.49	6.23	5.85	5.51	4.76	4.7	3.5	2.59	New [this study]			FMNH160608
	FMNH160609	Lophuromys stanleyi	aquilus										Yes	Yes	29.6179	-0.98701	Bwindi	UG	Bwindi_UG_FMNH160609	FMNH: 160609	1997	Male	Adult	54.74	27.95	15.3	12.9	11.59	8.14	6.84	7.01	6.66	6.11	5.31	4.83	5.16	4.27	3.11	New [this study]			FMNH160609
	FMNH160613	Lophuromys stanleyi	aquilus										Yes	Yes	29.6179	-0.98701	Bwindi	UG	Bwindi_UG_FMNH160613	FMNH: 160613	1997	Female	Adult	56.33	28.82	14.83	12.98	12.61	8.37	7.11	6.81	6.5	6.62	5.39	4.76	4.8	4.11	3.28	New [this study]			FMNH160613
	FMNH160623	Lophuromys stanleyi	aquilus										Yes	Yes	29.612	-1.02506	Bwindi	UG	Bwindi_UG_FMNH160623	FMNH: 160623	1997	Male	Adult	58.15	29.23	14.98	13.08	12.65	7.99	7.33	6.96	6.45	6.67	5.29	5.24	5.03	4.16	3.35	New [this study]			FMNH160623
	FMNH160631	Lophuromys stanleyi	aquilus										Yes	Yes	29.612	-1.02506	Bwindi	UG	Bwindi_UG_FMNH160631	FMNH: 160631	1997	Female	Young adult	53.37	27.13	14.04	12.23	11.62	7.44	6.81	6.72	6.36	5.76	5.13	4.65	4.83	3.75	2.69	New [this study]			FMNH160631
	FMNH160635	Lophuromys stanleyi	aquilus										Yes	Yes	29.612	-1.02506	Bwindi	UG	Bwindi_UG_FMNH160635	FMNH: 160635	1997	Female	Old adult	58.38	29.72	15.64	13.49	12.32	8.52	7.45	7.12	6.34	6.92	5.49	4.73	5.18	4.37	3.59	New [this study]			FMNH160635
	FMNH160636	Lophuromys stanleyi	aquilus										Yes	Yes	29.612	-1.02506	Bwindi	UG	Bwindi_UG_FMNH160636	FMNH: 160636	1997	Male	Young adult	52.96	26.36	14.52	12.74	11	7.32	6.77	6.71	5.83	6.02	5.11	4.78	4.62	4.02	2.82	New [this study]			FMNH160636
	FMNH160637	Lophuromys stanleyi	aquilus										Yes	Yes	29.612	-1.02506	Bwindi	UG	Bwindi_UG_FMNH160637	FMNH: 160637	1997	Male	Young adult	54.08	27.33	14.61	12.75	12.02	7.47	7.18	6.73	6.1	5.65	5.46	5.01	4.86	3.8	2.94	New [this study]			FMNH160637
	FMNH160639	Lophuromys stanleyi	aquilus										Yes	Yes	29.7167	-0.90221	Bwindi	UG	Bwindi_UG_FMNH160639	FMNH: 160639	1997	Female	Adult	53.91	27.22	13.91	12.32	11.56	7.52	6.73	6.45	6.45	5.94	5.39	5.11	4.59	3.7	2.98	New [this study]			FMNH160639
	FMNH160641	Lophuromys stanleyi	aquilus										Yes	Yes	29.7167	-0.90221	Bwindi	UG	Bwindi_UG_FMNH160641	FMNH: 160641	1997	Male	Old adult	59.54	30.42	16.18	13.89	12.6	8.98	7.7	7.55	6.96	6.51	5.93	5.32	5.74	4.28	3.35	New [this study]			FMNH160641
	FMNH160643	Lophuromys stanleyi	aquilus										Yes	Yes	29.7167	-0.90221	Bwindi	UG	Bwindi_UG_FMNH160643	FMNH: 160643	1997	Male	Adult	53.41	27.12	13.86	12.4	11.85	7.79	6.82	6.57	6.4	5.73	5.03	4.91	4.49	3.7	3.15	New [this study]			FMNH160643
	FMNH160648	Lophuromys stanleyi	aquilus										Yes	Yes	29.7167	-0.90221	Bwindi	UG	Bwindi_UG_FMNH160648	FMNH: 160648	1997	Female	Adult	55.46	28.3	15.27	13.13	11.68	7.67	7.16	7.22	6.35	6.31	5.46	5.37	5.07	4.31	2.94	New [this study]			FMNH160648
	FMNH160665	Lophuromys stanleyi	aquilus										Yes	Yes	29.6179	-0.98701	Bwindi	UG	Bwindi_UG_FMNH160665	FMNH: 160665	1997	Male	Adult	57.32	28.94	15.33	12.99	12.26	8.29	7.12	6.84	6.78	6.35	5.62	5.21	4.82	4.3	3.35	New [this study]			FMNH160665
	FMNH160684	Lophuromys stanleyi	aquilus										Yes	Yes	29.612	-1.02506	Bwindi	UG	Bwindi_UG_FMNH160684	FMNH: 160684	1997	Male	Adult	56.31	28.64	15.14	13.29	12.44	7.86	7.2	6.95	5.88	6.31	5.44	5.1	5.01	4.43	3.28	New [this study]			FMNH160684
	FMNH160690	Lophuromys stanleyi	aquilus										Yes	Yes	29.7167	-0.90221	Bwindi	UG	Bwindi_UG_FMNH160690	FMNH: 160690	1997	Male	Adult	55.24	27.94	14.75	12.98	11.59	7.97	7.09	6.67	6.58	5.83	5.46	5.04	4.53	3.8	3.06	New [this study]			FMNH160690
	FMNH160696	Lophuromys stanleyi	aquilus										Yes	Yes	29.7167	-0.90221	Bwindi	UG	Bwindi_UG_FMNH160696	FMNH: 160696	1997	Male	Old adult	57.56	29.17	15.23	13.42	12.24	8.32	7.2	7.22	6.79	6.42	5.39	5.29	5.16	4.19	3.12	New [this study]			FMNH160696
	FMNH160700	Lophuromys stanleyi	aquilus										Yes		29.7167	-0.90221	Bwindi	UG	Bwindi_UG_FMNH160700	FMNH: 160700	1997	Male	Young adult		26.8	14.35	13.15	10.81	7.55	7.64	6.68	5.98	6.01	5.25	4.8	4.67	3.95	2.87	New [this study]			FMNH160700
	FMNH161053	Lophuromys stanleyi	aquilus	H_86	33	25	Yes			Yes					-1.28127	29.8231	Echuya	UG	Echuya_UG_FMNH161053																				New [this study]			FMNH161053
	FMNH161055	Lophuromys stanleyi	aquilus										Yes	Yes	29.8178	-1.28167	Echuya	UG	Echunya_UG_FMNH161055	FMNH: 161055	1997	Female	Old adult	54.13	27.45	14.78	13.09	11.31	7.81	6.78	6.64	6.19	5.9	5.56	4.39	4.64	4.3	3.12	New [this study]			FMNH161055
	FMNH161056	Lophuromys stanleyi	aquilus										Yes	Yes	29.8178	-1.28167	Echuya	UG	Echunya_UG_FMNH161056	FMNH: 161056	1997	Female	Adult	53.32	27.19	13.55	12.45	11.83	7.45	6.67	6.44	6.32	5.98	5.11	4.51	4.62	4.16	3.03	New [this study]			FMNH161056
	FMNH161057	Lophuromys stanleyi	aquilus										Yes	Yes	29.8178	-1.28167	Echuya	UG	Echunya_UG_FMNH161057	FMNH: 161057	1997	Female	Old adult	53.45	27.2	14.83	13.16	11.53	7.52	6.89	6.63	5.84	6.15	5.25	4.56	4.77	4.25	3.02	New [this study]			FMNH161057
	FMNH161058	Lophuromys stanleyi	aquilus										Yes	Yes	29.8178	-1.28167	Echuya	UG	Echunya_UG_FMNH161058	FMNH: 161058	1997	Male	Young adult	54.23	27.84	14.6	13.43	11.92	7.88	7.29	6.28	6.44	6.27	5.13	4.65	4.62	4.23	2.86	New [this study]			FMNH161058
	FMNH161060	Lophuromys stanleyi	aquilus										Yes	Yes	29.8178	-1.28167	Echuya	UG	Echunya_UG_FMNH161060	FMNH: 161060	1997	Male	Old adult	56.31	28.75	15.36	13.12	12.34	8.09	7.23	6.7	6.43	6.39	5.33	4.83	4.95	3.99	2.87	New [this study]			FMNH161060
	FMNH161061	Lophuromys stanleyi	aquilus										Yes	Yes	29.8178	-1.28167	Echuya	UG	Echunya_UG_FMNH161061	FMNH: 161061	1997	Male	Old adult	57.72	29.02	15.44	13.37	12.16	8.41	7.63	6.87	6.48	6.28	5.54	5.06	5.05	4.6	3.04	New [this study]			FMNH161061
	FMNH161062	Lophuromys stanleyi	aquilus										Yes	Yes	29.8178	-1.28167	Echuya	UG	Echunya_UG_FMNH161062	FMNH: 161062	1997	Male	Old adult	54.18	27.95	14.25	12.59	12.53	7.87	6.9	6.72	6.7	6.06	5.27	4.49	4.47	3.33	2.88	New [this study]			FMNH161062
	FMNH161065	Lophuromys stanleyi	aquilus										Yes	Yes	29.8178	-1.28167	Echuya	UG	Echunya_UG_FMNH161065	FMNH: 161065	1997	Male	Old adult	55.91	28.68	15.54	13.57	12.59	8.64	7.35	7	6.9	6.3	5.25	5.07	5.09	3.8	3.25	New [this study]			FMNH161065
	FMNH161070	Lophuromys stanleyi	aquilus										Yes	Yes	29.8178	-1.28167	Echuya	UG	Echunya_UG_FMNH161070	FMNH: 161070	1997	Male	Young adult	52.3	26.88	14.31	12.95	10.93	7.41	7.15	6.7	6.42	6.14	5.35	5.12	4.73	3.73	3.03	New [this study]			FMNH161070
	FMNH165250	Lophuromys stanleyi	aquilus	H_99	33	31	Yes								1.73333	31.4667	Budongo	UG	Budongo_UG_FMNH165250																				New [this study]			FMNH165250
	FMNH165253	Lophuromys stanleyi	aquilus										Yes	Yes	31.5333	1.68333	Budongo	UG	Budongo_UG_FMNH165253	FMNH: 165253	1998	Male	Old adult	56.01	28.37	15.33	12.91	12.07	8.13	7.08	6.98	6.7	6.14	5.43	4.71	4.93	3.79	3.32	New [this study]			FMNH165253
	FMNH165254	Lophuromys stanleyi	aquilus	H_99	33	31	Yes								1.78524	31.5756	Budongo	UG	Budongo_UG_FMNH165254																				New [this study]			FMNH165254
	FMNH165255	Lophuromys stanleyi	aquilus	H_100	33	31	Yes			Yes			Yes	Yes	1.78524	31.5756	Budongo	UG	Budongo_UG_FMNH165255	FMNH: 165255	1998	Female	Adult	56.08	28.56	14.87	12.65	12.24	8.09	7.28	6.82	6.69	5.83	5.27	5.1	4.93	4.14	3.41	New [this study]			FMNH165255
	FMNH165257	Lophuromys stanleyi	aquilus										Yes	Yes	31.5833	1.75	Budongo	UG	Budongo_UG_FMNH165257	FMNH: 165257	1998	Female	Young adult	56.46	28.65	15.1	12.9	11.65	8.49	7.08	6.82	6.54	6.05	5.36	4.92	5.18	4.51	3.22	New [this study]			FMNH165257
	FMNH165259	Lophuromys stanleyi	aquilus										Yes	Yes	31.485	1.72129	Budongo	UG	Budongo_UG_FMNH165259	FMNH: 165259	1998	Female	Old adult	56.51	28.85	14.63	12.61	12.03	8.8	6.96	6.86	6.89	5.81	5.29	4.93	4.94	3.95	3.15	New [this study]			FMNH165259
	FMNH165261	Lophuromys stanleyi	aquilus										Yes	Yes	31.485	1.72129	Budongo	UG	Budongo_UG_FMNH165261	FMNH: 165261	1998	Female	Adult	61.47	31.43	16.03	13.51	13.6	8.82	8.09	7.29	7.58	6.64	5.23	5.77	5.73	3.95	3.44	New [this study]			FMNH165261
	FMNH165262	Lophuromys stanleyi	aquilus										Yes	Yes	31.485	1.72129	Budongo	UG	Budongo_UG_FMNH165262	FMNH: 165262	1998	Female	Young adult	53.39	27.33	14.34	12.56	11.33	7.78	6.98	6.31	6.23	5.6	5.21	4.64	4.5	3.97	2.86	New [this study]			FMNH165262
	FMNH165263	Lophuromys stanleyi	aquilus										Yes	Yes	31.485	1.72129	Budongo	UG	Budongo_UG_FMNH165263	FMNH: 165263	1998	Female	Adult	56.35	28.68	14.64	12.54	12.34	8.31	7.22	7.05	6.7	5.86	5.45	4.94	4.83	3.73	3.15	New [this study]			FMNH165263
	FMNH165265	Lophuromys stanleyi	aquilus				Yes						Yes	Yes	31.5333	1.68333	Budongo	UG	Budongo_UG_FMNH165265	FMNH: 165265	1998	Male	Young adult	54.77	28.11	14.62	12.28	11.7	7.67	6.88	6.88	6.39	5.88	5.21	4.96	4.9	4.18	3.04	New [this study]			FMNH165265
	FMNH165266	Lophuromys stanleyi	aquilus										Yes	Yes	31.5333	1.68333	Budongo	UG	Budongo_UG_FMNH165266	FMNH: 165266	1998	Female	Young adult	51.45	26.04	13.12	12.1	11.09	7.15	6.66	6.63	6.22	5.66	5	4.79	4.47	3.48	2.71	New [this study]			FMNH165266
	FMNH165267	Lophuromys stanleyi	aquilus	H_99	33	31	Yes						Yes	Yes	1.78524	31.5756	Budongo	UG	Budongo_UG_FMNH165267	FMNH: 165267	1998	Male	Old adult	56.84	29.24	14.48	12.52	12.44	8.61	7.13	7.15	7.34	5.9	5.04	5.03	4.82	3.88	3.11	New [this study]			FMNH165267
	FMNH165268	Lophuromys stanleyi	aquilus	H_93	33	25	Yes			Yes			Yes	Yes	1.78524	31.5756	Budongo	UG	Budongo_UG_FMNH165268	FMNH: 165268	1998	Female	Old adult	57.63	29.48	14.81	12.62	12.13	8.62	7.16	7.35	7.11	6.12	5.3	4.7	5.21	4.2	3.54	New [this study]			FMNH165268
	FMNH182176	Lophuromys stanleyi	aquilus										Yes	Yes	30.0835	-0.41725	Kalinzu	UG	Kalinzu_UG_FMNH182176	FMNH: 182176	1996	Male	Young adult	53.32	26.92	14.46	12.77	11.2	7.88	7.25	6.74	6.18	5.93	5.24	4.86	4.66	4.05	3.03	New [this study]			FMNH182176
	FMNH182177	Lophuromys stanleyi	aquilus										Yes	Yes	30.0835	-0.41725	Kalinzu	UG	Kalinzu_UG_FMNH182177	FMNH: 182177	1996	Male	Adult	56.2	28.45	15.64	12.65	12.26	7.68	7.46	7.1	6.23	6.21	5.33	5.11	5.22	4.03	2.98	New [this study]			FMNH182177
	FMNH182179	Lophuromys stanleyi	aquilus										Yes	Yes	30.0835	-0.41725	Kalinzu	UG	Kalinzu_UG_FMNH182179	FMNH: 182179	1996	Male	Adult	54.9	27.92	14.41	12.86	11.23	7.98	7.18	6.8	6.7	6.23	5.38	4.95	4.89	4.16	2.96	New [this study]			FMNH182179
	FMNH182180	Lophuromys stanleyi	aquilus										Yes	Yes	30.0835	-0.41725	Kalinzu	UG	Kalinzu_UG_FMNH182180	FMNH: 182180	1996	Female	Young adult	55.97	28.42	15.03	13.1	11.95	8.1	7.43	7.07	6.47	6.08	5.48	4.65	4.88	3.8	3.27	New [this study]			FMNH182180
	FMNH182181	Lophuromys stanleyi	aquilus										Yes	Yes	30.0835	-0.41725	Kalinzu	UG	Kalinzu_UG_FMNH182181	FMNH: 182181	1996	Female	Adult	55.12	27.91	14.9	13.16	11.77	7.98	6.97	7.02	6.43	6.06	5.31	5.04	4.81	4.35	3.12	New [this study]			FMNH182181
	FMNH187074	Lophuromys stanleyi	aquilus										Yes	Yes	31.7594	-2.70811	Ashanti	TZ	Ashanti_TZ_FMNH187074	FMNH: 187074	1998	Female	Adult	57.07	29.1	14.95	12.93	11.76	7.95	6.9	6.62	6.18	5.79	5.33	5.03	4.77	4.61	3.11	New [this study]			FMNH187074
	FMNH187075	Lophuromys stanleyi	aquilus										Yes	Yes	31.7594	-2.70811	Ashanti	TZ	Ashanti_TZ_FMNH187075	FMNH: 187075	1998	Male	Adult	57.48	29.03	15.59	13.13	11.69	8.15	7.24	6.97	6.11	6.14	5.68	5.25	5.15	4.71	3.55	New [this study]			FMNH187075
	FMNH192960	Lophuromys stanleyi	aquilus	H_97	33	31	Yes	Yes	Yes		Yes	Yes	Yes	Yes	-1.09418	31.5154	Minziro	TZ	Minziro_TZ_FMNH192960	FMNH: 192960	2006	Male	Adult	56.18	28.46	15.31	13.01	11.69	7.8	7.62	7.23	6.26	6.14	5.25	5.29	4.99	4.27	3.46	New [this study]			FMNH192960
	FMNH192961	Lophuromys stanleyi	aquilus				Yes	Yes					Yes	Yes	31.5154	-1.09418	Minziro	TZ	Minziro_TZ_FMNH192961	FMNH: 192961	2006	Male	Old adult	55.89	28.62	14.84	12.91	11.75	7.75	7.19	7.02	6.35	6.18	5.15	5.3	5.26	4.23	3.05	New [this study]			FMNH192961
	FMNH192962	Lophuromys stanleyi	aquilus	H_98	33	31	Yes	Yes		Yes	Yes		Yes	Yes	-1.09418	31.5154	Minziro	TZ	Minziro_TZ_FMNH192962	FMNH: 192962	2006	Male	Adult	55.48	28.25	15.06	12.8	11.57	7.86	7.27	6.91	6.67	6.42	5.29	5.27	5.05	4.12	2.93	New [this study]			FMNH192962
	FMNH210400	Lophuromys stanleyi	aquilus										Yes	Yes	30.3262	0.57112	Kibale	UG	Kibale_UG_FMNH210400	FMNH: 210400	2009	Female	Old adult	56.62	28.84	15.49	12.88	12.11	8.93	7.01	7.07	6.96	6.45	5.51	4.63	5.18	3.68	3.09	New [this study]			FMNH210400
	FMNH210403	Lophuromys stanleyi	aquilus	H_95	33	25	Yes			Yes					0.57755	30.3618	Kibale	UG	Kibale_UG_FMNH210403																				New [this study]			FMNH210403
	FMNH210404	Lophuromys stanleyi	aquilus	H_96	33	25	Yes								0.57755	30.3618	Kibale	UG	Kibale_UG_FMNH210404																				New [this study]			FMNH210404
	FMNH210405	Lophuromys stanleyi	aquilus										Yes	Yes	30.3346	0.59881	Kibale	UG	Kibale_UG_FMNH210405	FMNH: 210405	2009	Male	Adult	55.14	27.98	15.21	13.13	11.6	8.04	6.89	6.68	6.38	6.14	5.42	4.66	5.02	4.15	2.81	New [this study]			FMNH210405
	FMNH210408	Lophuromys stanleyi	aquilus										Yes	Yes	30.3346	0.59881	Kibale	UG	Kibale_UG_FMNH210408	FMNH: 210408	2009	Female	Old adult	55.41	28.33	14.47	12.7	11.79	8.21	7.49	6.96	6.66	6.63	5.22	5.07	4.98	3.89	3.26	New [this study]			FMNH210408
	FMNH210409	Lophuromys stanleyi	aquilus										Yes	Yes	30.3346	0.59881	Kibale	UG	Kibale_UG_FMNH210409	FMNH: 210409	2009	Female	Adult	55.06	28.31	15.31	12.58	11.93	8.07	7.19	6.81	6.41	6.38	5.34	4.9	4.62	4	3.11	New [this study]			FMNH210409
	FMNH210413	Lophuromys stanleyi	aquilus										Yes	Yes	30.3346	0.59881	Kibale	UG	Kibale_UG_FMNH210413	FMNH: 210413	2009	Female	Young adult	54.12	27.44	14.31	12.21	11.8	8.11	6.82	6.61	6.43	5.98	5.28	4.55	5.12	3.64	3	New [this study]			FMNH210413
	FMNH210415	Lophuromys stanleyi	aquilus										Yes	Yes	30.3346	0.59881	Kibale	UG	Kibale_UG_FMNH210415	FMNH: 210415	2009	Male	Old adult	55.92	28.35	15.6	12.52	12.16	8.11	7.28	6.84	6.52	6.22	5.69	4.69	4.85	4.08	3.21	New [this study]			FMNH210415
	FMNH210416	Lophuromys stanleyi	aquilus										Yes	Yes	30.3346	0.59881	Kibale	UG	Kibale_UG_FMNH210416	FMNH: 210416	2009	Male	Old adult	56.54	28.61	15.83	12.65	12.36	8.61	6.98	7.23	6.45	6.38	5.42	4.7	5.04	3.71	3.26	New [this study]			FMNH210416
	FMNH210417	Lophuromys stanleyi	aquilus										Yes	Yes	30.3346	0.59881	Kibale	UG	Kibale_UG_FMNH210417	FMNH: 210417	2009	Female	Young adult	56.16	28.6	16.67	12.62	12.02	8.27	6.9	6.79	6.22	6.17	5.81	4.89	4.77	4.52	3.01	New [this study]			FMNH210417
	FMNH210418	Lophuromys stanleyi	aquilus										Yes	Yes	30.3896	0.4842	Kibale	UG	Kibale_UG_FMNH210418	FMNH: 210418	2009	Female	Adult	54.39	27.66	14.96	12.35	11.17	8.06	7.02	6.77	6.68	5.9	5.21	4.66	4.8	4.38	3.05	New [this study]			FMNH210418
	FMNH210419	Lophuromys stanleyi	aquilus	H_92	33	25	Yes			Yes			Yes	Yes	0.57755	30.3618	Kibale	UG	Kibale_UG_FMNH210419	FMNH: 210419	2009	Female	Old adult	57.03	28.97	15.6	12.95	12.26	8.46	7.36	7.24	6.3	6.18	5.66	4.65	5.2	4.13	3.31	New [this study]			FMNH210419
	FMNH210420	Lophuromys stanleyi	aquilus	H_94	33	25	Yes								0.57755	30.3618	Kibale	UG	Kibale_UG_FMNH210420																				New [this study]			FMNH210420
	FMNH210424	Lophuromys stanleyi	aquilus										Yes	Yes	30.3346	0.59881	Kibale	UG	Kibale_UG_FMNH210424	FMNH: 210424	2009	Female	Old adult	56.62	28.78	15.37	13.02	12.1	8.66	7.24	7.12	6.9	6.1	5.48	4.87	5.14	3.77	2.97	New [this study]			FMNH210424
	FMNH210426	Lophuromys stanleyi	aquilus	H_95	33	25	Yes						Yes	Yes	0.57755	30.3618	Kibale	UG	Kibale_UG_FMNH210426	FMNH: 210426	2009	Female	Old adult	54.77	27.81	14.89	12.7	11.37	8.21	6.95	6.97	6.13	6.53	5.15	4.86	5.06	4.03	3.35	New [this study]			FMNH210426
	FMNH212202	Lophuromys stanleyi	aquilus										Yes	Yes	29.5033	-1.45491	Volcanoes	RW	Volcanoes_RW_FMNH212202	FMNH: 212202	2009	Male	Adult	53.51	27.38	13.89	12.61	11.48	7.7	7.15	6.39	6.11	6.47	5.36	4.76	4.61	4.12	2.8	New [this study]			FMNH212202
	FMNH212213	Lophuromys stanleyi	aquilus										Yes	Yes	29.5033	-1.45491	Volcanoes	RW	Volcanoes_RW_FMNH212213	FMNH: 212213	2009	Female	Old adult	53.27	27.09	14.3	12.24	11.5	8.03	6.88	6.73	6.05	6.14	5.41	4.41	4.73	3.85	2.77	New [this study]			FMNH212213
	FMNH212228	Lophuromys stanleyi	aquilus										Yes	Yes	29.5033	-1.45491	Volcanoes	RW	Volcanoes_RW_FMNH212228	FMNH: 212228	2009	Male	Old adult	54.58	27.9	14.73	13.27	11.59	8.17	7.08	6.55	5.96	6.38	5.49	4.84	4.78	4.17	3.03	New [this study]			FMNH212228
	FMNH212233	Lophuromys stanleyi	aquilus										Yes	Yes	29.5033	-1.45491	Volcanoes	RW	Volcanoes_RW_FMNH212233	FMNH: 212233	2009	Male	Old adult	53.5	27.35	14.43	13.04	11.23	7.6	7.2	6.3	5.94	6.08	5.5	4.7	4.47	4.18	2.82	New [this study]			FMNH212233
	FMNH212237	Lophuromys stanleyi	aquilus										Yes	Yes	29.5033	-1.45491	Volcanoes	RW	Volcanoes_RW_FMNH212237	FMNH: 212237	2009	Male	Old adult	54.92	28.03	14.44	12.76	11.43	8.03	7.28	6.86	6.26	6.26	5.36	4.95	4.62	4.21	2.92	New [this study]			FMNH212237
	FMNH212239	Lophuromys stanleyi	aquilus										Yes	Yes	29.5033	-1.45491	Volcanoes	RW	Volcanoes_RW_FMNH212239	FMNH: 212239	2009	Female	Old adult	52.89	26.96	13.92	12.46	11.73	7.39	7.05	6.73	5.8	6.08	5.22	4.96	4.54	3.99	2.71	New [this study]			FMNH212239
	FMNH212247	Lophuromys stanleyi	aquilus										Yes	Yes	29.5033	-1.45491	Volcanoes	RW	Volcanoes_RW_FMNH212247	FMNH: 212247	2009	Male	Old adult	54.71	28.04	14.79	13.32	11.84	8.02	7.08	6.56	6.16	6.11	5.33	4.56	4.32	4.18	2.61	New [this study]			FMNH212247
	FMNH212250	Lophuromys stanleyi	aquilus										Yes	Yes	29.5033	-1.45491	Volcanoes	RW	Volcanoes_RW_FMNH212250	FMNH: 212250	2009	Female	Adult	55.73	28.39	15.03	12.78	12.54	8.27	7.04	6.61	6.16	6.16	5.7	4.75	4.73	3.98	2.98	New [this study]			FMNH212250
	FMNH212258	Lophuromys stanleyi	aquilus										Yes	Yes	29.5599	-1.41043	Volcanoes	RW	Volcanoes_RW_FMNH212258	FMNH: 212258	2009	Male	Old adult	56.63	28.82	15.21	13.14	12.51	8.2	7.04	7.01	6.62	6.44	5.57	5.01	4.95	4.01	2.86	New [this study]			FMNH212258
	FMNH212263	Lophuromys stanleyi	aquilus										Yes	Yes	29.5599	-1.41043	Volcanoes	RW	Volcanoes_RW_FMNH212263	FMNH: 212263	2009	Male	Old adult	54.94	28.15	14.88	13.49	11.69	8.35	6.91	6.71	6.26	6.31	5.4	4.72	4.52	3.93	2.66	New [this study]			FMNH212263
	FMNH212269	Lophuromys stanleyi	aquilus										Yes	Yes	29.5599	-1.41043	Volcanoes	RW	Volcanoes_RW_FMNH212269	FMNH: 212269	2009	Male	Old adult	55.21	28.11	14.96	12.96	11.58	8.27	7.16	6.63	6.31	6.31	5.51	4.85	4.88	4.22	3.14	New [this study]			FMNH212269
	FMNH212271	Lophuromys stanleyi	aquilus										Yes	Yes	29.5033	-1.45491	Volcanoes	RW	Volcanoes_RW_FMNH212271	FMNH: 212271	2009	Male	Young adult	51.92	26.56	13.81	12.47	10.93	7.72	6.6	6.7	6.32	6.08	5.25	4.65	4.26	3.77	2.85	New [this study]			FMNH212271
	FMNH212272	Lophuromys stanleyi	aquilus										Yes	Yes	29.6486	-1.3922	Volcanoes	RW	Volcanoes_RW_FMNH212272	FMNH: 212272	2009	Female	Adult	54.55	27.91	14.04	12.66	11.69	7.63	7.3	6.54	6.67	5.84	5.22	5.04	4.63	3.82	2.95	New [this study]			FMNH212272
	FMNH212273	Lophuromys stanleyi	aquilus										Yes	Yes	29.6486	-1.3922	Volcanoes	RW	Volcanoes_RW_FMNH212273	FMNH: 212273	2009	Female	Adult	56.83	28.88	14.66	13.19	11.85	8.14	7.21	6.59	6.22	6.14	5.51	4.8	4.79	4.53	3.22	New [this study]			FMNH212273
	FMNH212274	Lophuromys stanleyi	aquilus										Yes	Yes	29.5856	-1.39486	Volcanoes	RW	Volcanoes_RW_FMNH212274	FMNH: 212274	2009	Female	Old adult	54.6	27.76	15.4	13.15	11.69	8.03	7.06	6.8	6.01	6.13	5.59	5.04	4.73	3.88	3.37	New [this study]			FMNH212274
	FMNH212277	Lophuromys stanleyi	aquilus										Yes	Yes	29.5856	-1.39486	Volcanoes	RW	Volcanoes_RW_FMNH212277	FMNH: 212277	2009	Male	Adult	54.27	27.39	14	12.67	11.19	7.75	7.01	6.5	6.31	6.22	5.49	4.71	4.58	3.86	2.73	New [this study]			FMNH212277
	FMNH215085	Lophuromys stanleyi	aquilus										Yes	Yes	29.635	-1.57068	Buhanga	RW	Buhanga_RW_FMNH215085	FMNH: 215085	2010		Old adult	58.54	29.68	15.61	13.18	13.18	8.44	7.03	7.12	6.44	5.97	5.58	4.99	5.15	4.04	3.42	New [this study]			FMNH215085
	FMNH215094	Lophuromys stanleyi	aquilus										Yes	Yes	29.635	-1.57068	Buhanga	RW	Buhanga_RW_FMNH215094	FMNH: 215094	2010		Old adult	58.38	29.7	15.57	13.47	13.12	8.38	7.52	7.23	6.25	6.64	5.89	5.04	5.3	3.98	3.35	New [this study]			FMNH215094
	FMNH215102	Lophuromys stanleyi	aquilus	H_87	33	25	Yes	Yes	Yes	Yes	Yes	Yes	Yes	Yes	-1.57009	29.6351	Buhanga	RW	Buhanga_RW_FMNH215102	FMNH: 215102	2010		Adult	57.45	29.42	14.83	13.23	12.42	8.61	7.56	6.87	6.73	6.51	5.4	5.02	4.9	3.87	2.89	New [this study]			FMNH215102
	FMNH215103	Lophuromys stanleyi	aquilus	H_85	33	25	Yes	Yes			Yes		Yes	Yes	-1.57009	29.6351	Buhanga	RW	Buhanga_RW_FMNH215103	FMNH: 215103	2010		Adult	57.79	29.83	14.72	12.86	12.75	8.39	7.45	6.74	6.35	6.19	5.49	4.93	5.34	4.21	3.02	New [this study]			FMNH215103
	FMNH215112	Lophuromys stanleyi	aquilus										Yes		29.635	-1.57068	Buhanga	RW	Buhanga_RW_FMNH215112	FMNH: 215112	2010		Old adult		28.85	15.2	13.34	12.7	8.23	7.24	7.03	6.61	6.5	5.59	5.06	5.28	3.71	3.16	New [this study]			FMNH215112
	FMNH215114	Lophuromys stanleyi	aquilus										Yes	Yes	29.635	-1.57068	Buhanga	RW	Buhanga_RW_FMNH215114	FMNH: 215114	2010		Old adult	58.01	29.24	14.95	13.25	12.46	8.68	7.49	7.02	6.61	6.45	5.37	4.74	5.29	4.53	3.29	New [this study]			FMNH215114
	FMNH215129	Lophuromys stanleyi	aquilus										Yes		29.635	-1.57068	Buhanga	RW	Buhanga_RW_FMNH215129	FMNH: 215129	2010		Old adult		29.39	15.23	12.93	12.7	8.27	7.22	6.9	6.31	6.19	5.4	4.89	5.12	4	3.12	New [this study]			FMNH215129
	FMNH215133	Lophuromys stanleyi	aquilus				Yes	Yes					Yes	Yes	29.635	-1.57068	Buhanga	RW	Buhanga_RW_FMNH215133	FMNH: 215133	2010			57.56	29.47	15.48	13.14	12.66	8.49	7.52	7.01	6.6	6.34	5.66	4.91	5.12	3.94	3.43	New [this study]			FMNH215133
	FMNH215168	Lophuromys stanleyi	aquilus										Yes	Yes	29.635	-1.57068	Buhanga	RW	Buhanga_RW_FMNH215168	FMNH: 215168	2010		Old adult	56.74	29.19	15.1	12.8	12.79	8.29	7.35	6.95	6.73	6.47	5.65	4.9	4.88	3.6	3.47	New [this study]			FMNH215168
	FMNH215169	Lophuromys stanleyi	aquilus										Yes		29.635	-1.57068	Buhanga	RW	Buhanga_RW_FMNH215169	FMNH: 215169	2010		Old adult		29.3	15.64	13.11	12.7	8.55	7.53	7.17	6.34	6.81	5.67	5.01	5.49	4.5	3.09	New [this study]			FMNH215169
	FMNH217167	Lophuromys stanleyi	aquilus	H_99	33	31	Yes			Yes					1.07718	34.7247	Elgon	KE	Elgon_KE_FMNH217167																				New [this study]			FMNH217167
	FMNH223221	Lophuromys stanleyi	aquilus				Yes	Yes					Yes	Yes	32.954	0.4373	Mabira	UG	Mabira_UG_FMNH223221	FMNH: 223221	2012	Female	Young adult	52.58	26.8	13.67	12.27	11	7.38	6.97	6.71	6.01	5.84	5.06	5.02	4.58	3.99	3.17	New [this study]			FMNH223221
	FMNH223232	Lophuromys stanleyi	aquilus										Yes	Yes	32.9859	0.38998	Mabira	UG	Mabira_UG_FMNH223232	FMNH: 223232	2012	Male	Young adult	57.24	29	15.22	12.91	12.09	8.05	7.34	6.93	5.97	6.15	5.22	5.05	5.23	4.51	2.99	New [this study]			FMNH223232
	FMNH224107	Lophuromys stanleyi	aquilus										Yes	Yes	30.3896	0.4842	Kibale	UG	Kibale_UG_FMNH224107	FMNH: 224107	2013	Male	Young adult	52.93	26.87	13.89	12.39	11.36	7.49	6.96	6.42	6.27	5.8	5.15	4.64	4.87	3.9	2.78	New [this study]			FMNH224107
	FMNH224109	Lophuromys stanleyi	aquilus										Yes	Yes	30.3896	0.4842	Kibale	UG	Kibale_UG_FMNH224109	FMNH: 224109	2013	Male	Young adult	52.77	26.94	13.82	12.47	11.49	7.55	6.98	6.71	5.88	5.93	5.26	4.75	4.92	3.8	3.05	New [this study]			FMNH224109
	FMNH224112	Lophuromys stanleyi	aquilus										Yes	Yes	30.3896	0.4842	Kibale	UG	Kibale_UG_FMNH224112	FMNH: 224112	2013	Male	Young adult	54.87	27.73	15.02	13.08	11.3	7.88	7.49	6.88	6.57	6.25	5.3	5.02	5.05	3.81	2.93	New [this study]			FMNH224112
	FMNH224123	Lophuromys stanleyi	aquilus										Yes	Yes	30.3896	0.4842	Kibale	UG	Kibale_UG_FMNH224123	FMNH: 224123	2013	Male	Adult	56.71	29.2	15.3	13.25	12	8.72	6.98	6.81	6.39	6.22	5.22	4.77	4.86	4.55	2.96	New [this study]			FMNH224123
	FMNH224125	Lophuromys stanleyi	aquilus										Yes	Yes	30.3896	0.4842	Kibale	UG	Kibale_UG_FMNH224125	FMNH: 224125	2013	Male	Young adult	55.45	28.15	14.98	13.26	12.28	8.22	7.06	6.61	6.2	6.21	5.39	4.39	4.88	3.63	3.13	New [this study]			FMNH224125
	FMNH224470	Lophuromys stanleyi	aquilus										Yes	Yes	30.3896	0.4842	Kibale	UG	Kibale_UG_FMNH224470	FMNH: 224470	2013	Female	Young adult	53.04	26.87	14.39	12.84	10.95	7.55	6.99	6.27	5.61	5.88	5.16	4.58	4.6	4.36	2.83	New [this study]			FMNH224470
	FMNH225062	Lophuromys stanleyi	aquilus										Yes	Yes	31.6547	0.9138	Luwunga	UG	Luwunga_UG_FMNH225062	FMNH: 225062	2013	Female	Adult	56.23	28.28	13.85	12.4	11.82	7.99	7.52	6.91	6.12	5.96	5.29	4.72	5.09	4.25	3.21	New [this study]			FMNH225062
	FMNH225073	Lophuromys stanleyi	aquilus	H_99	33	31	Yes	Yes	Yes	Yes	Yes	Yes	Yes	Yes	0.9138	31.6547	Luwunga	UG	Luwunga_UG_FMNH225073	FMNH: 225073	2013	Male	Young adult	54.86	27.86	14.75	12.6	11.72	8.1	7.14	6.71	6.68	6.15	5.16	4.7	4.97	3.89	3.09	New [this study]			FMNH225073
	FMNH225077	Lophuromys stanleyi	aquilus										Yes	Yes	31.6547	0.9138	Luwunga	UG	Luwunga_UG_FMNH225077	FMNH: 225077	2013		Young adult	55.7	28.37	15.29	13.05	12.05	8	7.13	6.97	6.57	5.87	5.23	4.76	5	3.68	2.93	New [this study]			FMNH225077
	FMNH232182	Lophuromys stanleyi	aquilus										Yes	Yes	34.0293	3.81083	Morungole	UG	Morungole_UG_FMNH232182	FMNH: 232182	2016	Male	Adult	55.16	28.03	14.79	12.18	12.42	7.8	7.02	6.87	6.21	5.95	5.38	5.02	4.95	3.8	3.21	New [this study]			FMNH232182
	FMNH232183	Lophuromys stanleyi	aquilus										Yes	Yes	34.0293	3.81083	Morungole	UG	Morungole_UG_FMNH232183	FMNH: 232183	2016	Male	Young adult	51.65	26.24	13.57	12.21	10.96	7.37	6.9	6.3	6.21	5.84	5.14	4.73	4.53	3.46	2.79	New [this study]			FMNH232183
	FMNH232184	Lophuromys stanleyi	aquilus										Yes	Yes	34.0293	3.81083	Morungole	UG	Morungole_UG_FMNH232184	FMNH: 232184	2016	Female	Adult	54.88	27.47	14.72	12.72	11.39	7.93	6.84	6.86	6.62	6.18	5.34	5.16	5.05	3.7	3.08	New [this study]			FMNH232184
	FMNH232192	Lophuromys stanleyi	aquilus										Yes	Yes	34.0293	3.81083	Morungole	UG	Morungole_UG_FMNH232192	FMNH: 232192	2016	Female	Old adult	54.93	28.18	15.34	12.86	11.63	8.02	6.97	6.93	6.34	6.04	5.04	5.24	4.78	4.05	3.22	New [this study]			FMNH232192
	FMNH232193	Lophuromys stanleyi	aquilus										Yes	Yes	34.0293	3.81083	Morungole	UG	Morungole_UG_FMNH232193	FMNH: 232193	2016	Male	Adult	55	27.77	14.65	12.44	11.85	8.03	7.09	6.85	6.47	6.05	5.27	4.67	5.01	3.67	3.37	New [this study]			FMNH232193
	FMNH232206	Lophuromys stanleyi	aquilus	H_103	33	31	Yes	Yes	Yes	Yes	Yes	Yes			3.81083	34.0293	Morungole	UG	Morungole_UG_FMNH232206																				New [this study]			FMNH232206
	FMNH232212	Lophuromys stanleyi	aquilus										Yes	Yes	34.0293	3.81083	Morungole	UG	Morungole_UG_FMNH232212	FMNH: 232212	2016	Female	Young adult	49.54	24.79	13.95	12.35	10.11	6.41	7.22	6.83	5.49	5.74	4.99	5.19	4.38	3.84	2.84	New [this study]			FMNH232212
	FMNH232218	Lophuromys stanleyi	aquilus	H_105	33	31	Yes	Yes			Yes				3.81083	34.0293	Morungole	UG	Morungole_UG_FMNH232218																				New [this study]			FMNH232218
	FMNH232416	Lophuromys stanleyi	aquilus										Yes	Yes	32.9226	3.81039	AgoroAgu	UG	Agoro_UG_FMNH232416	FMNH: 232416	2016	Female	Adult	54.35	27.12	14.23	12.22	11.21	8.04	6.87	6.33	5.99	5.75	5.1	4.78	4.63	4.3	2.98	New [this study]			FMNH232416
	FMNH232417	Lophuromys stanleyi	aquilus	H_103	33	31	Yes	Yes	Yes	Yes	Yes	Yes			3.81083	34.0293	AgoroAgu	UG	AgoroAgu_UG_FMNH232417																				New [this study]			FMNH232417
	FMNH232418	Lophuromys stanleyi	aquilus	H_101	33	31	Yes	Yes			Yes				3.81083	34.0293	AgoroAgu	UG	AgoroAgu_UG_FMNH232418																				New [this study]			FMNH232418
	FMNH232419	Lophuromys stanleyi	aquilus	H_102	33	31	Yes	Yes	Yes		Yes	Yes			3.81083	34.0293	AgoroAgu	UG	AgoroAgu_UG_FMNH232419																				New [this study]			FMNH232419
	FMNH25848	Lophuromys stanleyi	aquilus										Yes	Yes	29.8111	0.34236	Rwenzori	CD	Rwenzori_CD_FMNH25848	FMNH: 25848	1925	Male	Old adult	58.91	29.9	15.51	13.02	12.07	8.68	7.52	7.2	6.79	6.48	5.75	4.86	5.1	4.38	3.5	New [this study]			FMNH25848
	FMNH25850	Lophuromys stanleyi	aquilus										Yes	Yes	29.8111	0.34236	Rwenzori	CD	Rwenzori_CD_FMNH25850	FMNH: 25850	1925	Male	Adult	55.76	28.12	15.18	13.24	11.63	8.39	7.45	6.6	6.43	6.51	5.32	4.55	4.86	4.2	2.99	New [this study]			FMNH25850
	FMNH25851	Lophuromys stanleyi	aquilus										Yes	Yes	29.8111	0.34236	Rwenzori	CD	Rwenzori_CD_FMNH25851	FMNH: 25851	1925	Female	Adult	55.57	28.16	14.54	12.75	11.39	8.05	7.08	6.77	6.67	6.18	5.44	4.84	5	4.08	3.17	New [this study]			FMNH25851
	FMNH25855	Lophuromys stanleyi	aquilus										Yes	Yes	29.8111	0.34236	Rwenzori	CD	Rwenzori_CD_FMNH25855	FMNH: 25855	1925	Female	Young adult	52.06	26.14	14.19	12.66	11.02	7.45	7.04	6.47	5.49	6.31	5.49	4.48	4.62	3.94	2.75	New [this study]			FMNH25855
	FMNH25859	Lophuromys stanleyi	aquilus										Yes	Yes	29.8347	0.33128	Rwenzori	CD	Rwenzori_CD_FMNH25859	FMNH: 25859	1925	Male	Adult	54.49	27.81	14.48	12.82	11.59	7.98	7.4	6.56	6.26	6.45	5.33	4.79	4.81	4.11	2.99	New [this study]			FMNH25859
	FMNH25861	Lophuromys stanleyi	aquilus										Yes	Yes	29.8347	0.33128	Rwenzori	CD	Rwenzori_CD_FMNH25861	FMNH: 25861	1925	Male	Young adult	52.18	26.51	14.01	12.65	10.84	7.61	6.86	6.7	6.17	6.24	5.22	4.55	4.52	3.94	2.95	New [this study]			FMNH25861
	FMNH25862	Lophuromys stanleyi	aquilus										Yes	Yes	29.8347	0.33128	Rwenzori	CD	Rwenzori_CD_FMNH25862	FMNH: 25862	1925	Male	Old adult	54.07	27.41	14.29	12.88	11.75	8.04	7.16	6.56	6.03	6.09	5.63	4.51	4.61	4.16	3.13	New [this study]			FMNH25862
	FMNH25864	Lophuromys stanleyi	aquilus										Yes	Yes	29.8508	0.34221	Rwenzori	CD	Rwenzori_CD_FMNH25864	FMNH: 25864	1925	Female	Adult	53.46	26.87	14.01	12.61	11.13	7.73	7.23	6.63	6.19	6.12	5.15	4.56	4.67	3.99	2.92	New [this study]			FMNH25864
	FMNH25867	Lophuromys stanleyi	aquilus										Yes	Yes	29.8508	0.34221	Rwenzori	CD	Rwenzori_CD_FMNH25867	FMNH: 25867	1925	Male	Adult	52.89	26.72	15.08	13.32	11.25	7.87	7.1	7.09	6.09	6.41	5.18	4.57	4.74	3.77	3.37	New [this study]			FMNH25867
	FMNH25871	Lophuromys stanleyi	aquilus										Yes	Yes	29.8347	0.33128	Rwenzori	CD	Rwenzori_CD_FMNH25871	FMNH: 25871	1925	Male	Old adult	53.87	27.43	14.28	13.24	11.28	8.09	7.38	6.52	6.36	6.21	5.28	4.44	4.63	4.07	3.09	New [this study]			FMNH25871
	FMNH25872	Lophuromys stanleyi	aquilus										Yes	Yes	29.8226	0.32763	Rwenzori	CD	Rwenzori_CD_FMNH25872	FMNH: 25872	1925	Male	Adult	55.16	28.26	14.19	12.45	12.07	8.19	7	6.79	6.16	5.94	5.52	4.56	4.63	3.62	3.12	New [this study]			FMNH25872
	FMNH25873	Lophuromys stanleyi	aquilus										Yes	Yes	29.8226	0.32763	Rwenzori	CD	Rwenzori_CD_FMNH25873	FMNH: 25873	1925	Female	Young adult	54.06	27.4	14.44	13.06	11.39	7.87	7.06	6.6	6.04	5.91	5.6	4.58	4.67	4.28	3.13	New [this study]			FMNH25873
	FMNH25874	Lophuromys stanleyi	aquilus										Yes	Yes	29.7533	0.34188	Rwenzori	CD	Rwenzori_CD_FMNH25874	FMNH: 25874	1925	Male	Adult	55.62	28.64	15.28	13.03	12.46	8.65	7.28	7.05	6.68	6.29	5.17	4.8	5.09	3.66	3.29	New [this study]			FMNH25874
	FMNH25875	Lophuromys stanleyi	aquilus										Yes	Yes	29.7533	0.34188	Rwenzori	CD	Rwenzori_CD_FMNH25875	FMNH: 25875	1925	Male	Young adult	52.15	26.35	13.84	12.56	10.96	7.26	6.92	6.54	5.9	6.31	5.44	4.9	4.62	4.25	2.98	New [this study]			FMNH25875
	FMNH25901	Lophuromys stanleyi	aquilus										Yes	Yes	29.7533	0.34188	Rwenzori	CD	Rwenzori_CD_FMNH25901	FMNH: 25901	1925	Female	Adult	56.37	28.52	14.91	12.78	12.71	8.1	6.99	7.01	6.41	6.4	5.52	5.03	5.06	3.9	3.15	New [this study]			FMNH25901
	FMNH26533	Lophuromys stanleyi	aquilus										Yes	Yes	29.7	-1.3	Virunga	UG	Virunga_UG_FMNH26533	FMNH: 26533	1925	Male	Old adult	55.34	28.2	14.62	12.65	11.91	8.25	7.21	6.86	6.67	6.4	5.57	4.85	4.92	3.95	3.14	New [this study]			FMNH26533
	FMNH26537	Lophuromys stanleyi	aquilus										Yes	Yes	29.7	-1.3	Virunga	UG	Virunga_UG_FMNH26537	FMNH: 26537	1925	Male	Adult	54.18	27.77	14.35	12.88	11.31	7.9	7.25	6.47	6.44	6.11	5.13	4.77	4.8	4.15	3.18	New [this study]			FMNH26537
	FMNH26538	Lophuromys stanleyi	aquilus										Yes	Yes	29.7	-1.3	Virunga	UG	Virunga_UG_FMNH26538	FMNH: 26538	1925	Male	Young adult	54.01	27.17	14.66	13.06	11.83	7.28	6.93	6.65	5.82	6.05	5.49	4.78	4.84	3.81	3.01	New [this study]			FMNH26538
	FMNH26539	Lophuromys stanleyi	aquilus										Yes	Yes	29.7	-1.3	Virunga	UG	Virunga_UG_FMNH26539	FMNH: 26539	1925	Male	Young adult	50.06	25.47	13.62	12.43	10.45	6.74	6.85	6.19	5.39	6.04	5.24	4.75	4.37	3.93	2.77	New [this study]			FMNH26539
	FMNH26540	Lophuromys stanleyi	aquilus										Yes	Yes	29.7	-1.3	Virunga	UG	Virunga_UG_FMNH26540	FMNH: 26540	1925	Male	Young adult	55.01	27.88	14.8	12.9	12.42	7.52	7.07	6.52	6.09	6.19	5.6	4.95	4.83	3.94	2.87	New [this study]			FMNH26540
	FMNH26544	Lophuromys stanleyi	aquilus										Yes	Yes	29.7	-1.3	Virunga	UG	Virunga_UG_FMNH26544	FMNH: 26544	1925	Female	Adult	55.08	27.7	14.52	12.8	11.72	7.89	7.11	6.56	6.31	5.84	5.78	4.66	4.95	4.03	2.64	New [this study]			FMNH26544
	FMNH86292	Lophuromys stanleyi	aquilus										Yes		32	1.81667	Kigumba	UG	Kigumba_UG_FMNH86292	FMNH: 86292	1956	Female	Old adult		28.8	14.9	12.58	12.04	8.14	7.3	7.06	6.95	5.97	5.37	4.88	4.92	3.83	3.15	New [this study]			FMNH86292
	FMNHSS080	Lophuromys stanleyi	aquilus	H_99	33	31	Yes	Yes	Yes	Yes	Yes	Yes	Yes	Yes	3.98783	32.8947	Imatong	SS	Imatong_SS_FMNHSS080	FMNH: SS080		Female	Adult	55.87	28.24	14.72	13.12	11.61	7.88	7.05	6.65	6.47	6.07	5.3	4.92	4.88	4.08	3.11	New [this study]			FMNHSS080
	FMNHSS113	Lophuromys stanleyi	aquilus										Yes	Yes	32.8947	3.98783	Imatong	SS	Imatong_SS_FMNHSS113	FMNH: SS113		Male	Adult	55.3	27.83	14.64	12.65	11.31	8.05	7.22	6.4	6.27	5.87	5.31	4.92	4.92	4.13	2.83	New [this study]			FMNHSS113
	FMNHSS196	Lophuromys stanleyi	aquilus	H_103	33	31	Yes	Yes	Yes		Yes	Yes	Yes	Yes	3.99119	32.8942	Imatong	SS	Imatong_SS_FMNHSS196	FMNH: SS196		Male	Young adult	49.92	25.3	13.79	12.13	10.26	7.23	6.97	6.44	5.63	5.55	5.03	4.83	4.66	3.86	2.99	New [this study]			FMNHSS196
	FMNHSS208	Lophuromys stanleyi	aquilus				Yes	Yes	Yes				Yes	Yes	32.8947	3.98783	Imatong	SS	Imatong_SS_FMNHSS208	FMNH: SS208		Male	Old adult	55.5	28.49	14.48	12.55	11.9	8.66	6.97	6.58	7.04	5.68	5.41	4.85	4.88	3.6	3.1	New [this study]			FMNHSS208
	FMNHSS215	Lophuromys stanleyi	aquilus										Yes	Yes	32.8947	3.98783	Imatong	SS	Imatong_SS_FMNHSS215	FMNH: SS215		Male	Adult	56.76	28.87	15.21	12.88	11.91	8.48	7.13	6.64	6.62	6	5.46	4.95	5.09	4.51	3.41	New [this study]			FMNHSS215
	FMNHSS271	Lophuromys stanleyi	aquilus				Yes	Yes	Yes				Yes	Yes	32.8472	4.01187	Imatong	SS	Imatong_SS_FMNHSS271	FMNH: SS271		Female	Adult	56.01	28.19	15.24	12.82	11.22	8.35	7.06	6.84	6.51	6.26	5.39	4.74	4.88	4.18	3.31	New [this study]			FMNHSS271
	JCK1479	Lophuromys stanleyi	aquilus	H_89	33	25	Yes			Yes					-0.28266	32.1397	Sese	UG	Sese_UG_JCK1479																				New [this study]			JCK1479
	JCK1855	Lophuromys stanleyi	aquilus	H_95	33	25	Yes								0.3833	29.9333	Rwenzori	UG	Rwenzori_UG_JCK1855																				New [this study]			JCK1855
	JCK1856	Lophuromys stanleyi	aquilus	H_93	33	25	Yes								0.3833	29.9333	Rwenzori	UG	Rwenzori_UG_JCK1856																				New [this study]			JCK1856
	JCK1876	Lophuromys stanleyi	aquilus	H_104	33	31	Yes			Yes					0.3833	29.9333	Rwenzori	UG	Rwenzori_UG_JCK1876																				New [this study]			JCK1876
	JCK2021	Lophuromys stanleyi	aquilus	H_95	33	25	Yes								0.3833	29.9333	Rwenzori	UG	Rwenzori_UG_JCK2021																				New [this study]			JCK2021
	JCK2100	Lophuromys stanleyi	aquilus	H_95	33	25	Yes								0.3833	29.9333	Rwenzori	UG	Rwenzori_UG_JCK2100																				New [this study]			JCK2100
	KE2018081054	Lophuromys stanleyi	aquilus	H_99	33	31	Yes			Yes					0.3535	34.8668	Kakamega	KE	KE2018081054																				New [this study]			KE2018081054
	KY595877	Lophuromys stanleyi	aquilus	H_98	33	31	Yes								-1.09418	31.5154	Minziro	TZ	KY595877_TA080																				GenBank	KY595877		KY595877
	KY595878	Lophuromys stanleyi	aquilus	H_106	33	31	Yes								-1.09418	31.5154	Minziro	TZ	KY595878_TA081																				GenBank	KY595878		KY595878
	KY595879	Lophuromys stanleyi	aquilus	H_98	33	31	Yes			Yes					-1.22419	30.7804	Rumanyika	TZ	KY595879																				GenBank	KY595879		KY595879
	KY754016	Lophuromys stanleyi	aquilus	H_95	33	25	Yes								0.3833	29.9333	Rwenzori	UG	Rwenzori_UG_KY754016																				GenBank	KY754016		KY754016
	TA085	Lophuromys stanleyi	aquilus	H_93	33	25	Yes								-1.031	31.5722	Minziro	TZ	TA085																				GenBank	MN616994		TA085
	TA106	Lophuromys stanleyi	aquilus	H_93	33	25	Yes								-1.0384	31.5422	Minziro	TZ	TA106																				GenBank	MN616996		TA106
	TA109	Lophuromys stanleyi	aquilus	H_97	33	31	Yes								-1.0384	31.5422	Minziro	TZ	TA109																				GenBank	MN616997		TA109
	FMNH205158	Lophuromys verhageni	aquilus	H_47	55	38	Yes	Yes		Yes	Yes		Yes	Yes	-3.242	36.7874	Meru	TZ	FMNH205158	FMNH: 205158	2008	Female	Adult	54.12	28.01	14.92	12.91	11.82	8.24	6.81	7.23	6.11	6.34	5.24	5.08	5.04	4.24	2.98	New [this study]		correct L. verhageni sequence but possible error in ID, which doest match the sampling locality	FMNH205158
	FMNH208098	Lophuromys verhageni	aquilus	H_46	55	38	Yes	Yes	Yes	Yes	Yes	Yes	Yes		-3.242	36.7874	Meru	TZ	Meru_TZ_FMNH208098	FMNH: 208098	2009	Male	Young adult		27.61	14.26	12.95	11.62	7.59	7.1	6.72	5.72	5.89	5.29	5.07	4.58	4.44	2.68	New [this study]			FMNH208098
	FMNH208464	Lophuromys verhageni	aquilus	H_47	55	38	Yes	Yes		Yes	Yes		Yes	Yes	-3.24725	36.8007	Meru	TZ	Meru_TZ_FMNH208464	FMNH: 208464	2009	Male	Old adult	60.95	31.01	15.51	13.52	12.96	9.05	7.77	5.27	6.26	6.41	5.77	5.25	4.91	5.18	3.13	New [this study]			FMNH208464
	FMNH208468	Lophuromys verhageni	aquilus				Yes						Yes	Yes	36.8007	-3.24725	Meru	TZ	Meru_TZ_FMNH208468	FMNH: 208468	2009	Male	Young adult	53.85	27.4	14.06	12.68	11.54	7.68	7	6.72	6.11	6.1	5.34	4.98	4.78	4.43	2.75	New [this study]			FMNH208468
	FMNH208469	Lophuromys verhageni	aquilus										Yes	Yes	36.8007	-3.24725	Meru	TZ	Meru_TZ_FMNH208469	FMNH: 208469	2009	Male	Young adult	56.31	28.58	14.87	12.97	11.92	8.01	7.67	6.95	6.03	6.21	5.33	4.95	5.1	4.96	3	New [this study]			FMNH208469
	FMNH208471	Lophuromys verhageni	aquilus										Yes	Yes	36.8007	-3.24725	Meru	TZ	Meru_TZ_FMNH208471	FMNH: 208471	2009	Female	Young adult	53.8	27.53	14.02	12.8	11.38	7.58	7.2	6.72	6.08	6.14	5.21	5.12	4.74	4.45	2.77	New [this study]			FMNH208471
	FMNH208475	Lophuromys verhageni	aquilus										Yes		36.8007	-3.24725	Meru	TZ	Meru_TZ_FMNH208475	FMNH: 208475	2009	Female	Old adult		29.47	14.71	13.43	12.18	8.63	7.58	7.15	5.91	6.2	5.46	5.05	4.96	5.22	2.99	New [this study]			FMNH208475
	FMNH208479	Lophuromys verhageni	aquilus				Yes	Yes					Yes	Yes	36.7867	-3.2235	Meru	TZ	Meru_TZ_FMNH208479	FMNH: 208479	2009	Male	Old adult	59.87	30.44	15.28	13.03	13.2	8.53	7.09	7.22	6.51	6.06	5.92	4.98	5	4.68	2.81	New [this study]			FMNH208479
	FMNH208482	Lophuromys verhageni	aquilus				Yes	Yes					Yes	Yes	36.7867	-3.2235	Meru	TZ	Meru_TZ_FMNH208482	FMNH: 208482	2009	Male	Young adult	55.39	27.91	14.04	12.69	11.75	7.58	7.39	6.74	5.71	6.02	5.42	5.11	5.04	4.83	2.74	New [this study]			FMNH208482
	FMNH208485	Lophuromys verhageni	aquilus	H_47	55	38	Yes	Yes	Yes	Yes	Yes	Yes	Yes	Yes	-3.21609	36.769	Meru	TZ	Meru_TZ_FMNH208485	FMNH: 208485	2009	Male	Young adult	57.87	29.38	14.74	12.75	12.58	8.24	7.12	6.67	6.43	6.06	5.18	4.96	4.71	4.66	2.93	New [this study]			FMNH208485
	FMNH208486	Lophuromys verhageni	aquilus	H_47	55	38	Yes	Yes		Yes	Yes		Yes	Yes	-3.21609	36.769	Meru	TZ	Meru_TZ_FMNH208486	FMNH: 208486	2009	Female	Young adult	52.16	26.59	13.89	12.32	11.33	7.16	7.15	6.81	5.9	5.96	5.19	4.99	4.78	4.31	2.74	New [this study]			FMNH208486
	FMNH208487	Lophuromys verhageni	aquilus				Yes	Yes					Yes	Yes	36.7874	-3.242	Meru	TZ	Meru_TZ_FMNH208487	FMNH: 208487	2009	Male	Old adult	58.96	30.5	14.92	13.06	12.71	8.98	7.52	7.01	6.38	6.18	5.68	4.98	4.85	5.07	2.89	New [this study]			FMNH208487
	FMNH208488	Lophuromys verhageni	aquilus										Yes	Yes	36.7874	-3.242	Meru	TZ	Meru_TZ_FMNH208488	FMNH: 208488	2009	Female	Adult	56.21	28.96	14.35	12.88	12.2	8.23	7.41	6.7	6.18	5.84	5.67	5.04	4.66	4.87	2.87	New [this study]			FMNH208488
	FMNH208490	Lophuromys verhageni	aquilus										Yes	Yes	36.7874	-3.242	Meru	TZ	Meru_TZ_FMNH208490	FMNH: 208490	2009	Female	Young adult	56.92	28.93	14.39	12.92	12.62	7.75	7.44	5.09	5.93	6	5.41	5.09	4.71	4.67	2.78	New [this study]			FMNH208490
	FMNH208491	Lophuromys verhageni	aquilus										Yes	Yes	36.7874	-3.242	Meru	TZ	Meru_TZ_FMNH208491	FMNH: 208491	2009	Male	Young adult	53.61	27.49	14.08	12.67	11.4	7.52	7.17	6.72	5.83	5.9	5.34	5.12	4.79	4.37	2.67	New [this study]			FMNH208491
	FMNH48656	Lophuromys verhageni	aquilus										Yes	Yes	36.75	-3.23333	Meru	TZ	Meru_TZ_FMNH48656	FMNH: 48656	1938	Male	Old adult	57.4	29.17	14.93	13.08	12.26	8.25	7.14	7.1	5.51	6.3	5.42	4.94	5.25	5.05	2.85	New [this study]			FMNH48656
	FMNH48657	Lophuromys verhageni	aquilus										Yes	Yes	36.75	-3.23333	Meru	TZ	Meru_TZ_FMNH48657	FMNH: 48657	1938	Male	Young adult	54.83	27.99	13.95	13	11.75	7.71	7.28	6.61	5.53	5.8	5.67	5.02	4.79	4.51	2.65	New [this study]			FMNH48657
	FMNH86286	Lophuromys verhageni	aquilus										Yes	Yes	36.75	-3.23333	Meru	TZ	Meru_TZ_FMNH86286	FMNH: 86286	1956	Male	Young adult	53.07	28.99	14.55	12.47	12.58	8.25	7.12	6.61	6.07	6.38	5.85	4.79	4.93	4.63	2.91	New [this study]			FMNH86286
	TZ14368	Lophuromys verhageni	aquilus	H_47	55	38	Yes			Yes					-3.23847	36.7174	Chingombe	TZ	Meru_TZ_14368																				Komarova et al., 2020			TZ14368
	FMNH153274	Lophuromys zena	aquilus										Yes		36.75	-1.33333	Nairobi	KE	Nairobi_KE_FMNH153274	FMNH: 153274	1965	Male	Adult		27.81	13.75	12.35	11.55	7.84	6.88	6.64	6.02	5.72	5.46	4.81	4.68	4.32	2.76	New [this study]			FMNH153274
	FMNH153275	Lophuromys zena	aquilus										Yes	Yes	36.75	-1.33333	Nairobi	KE	Nairobi_KE_FMNH153275	FMNH: 153275	1965	Female	Young adult	49.35	25.27	12.73	12.05	10	7.06	6.72	6.18	5.68	5.48	5.29	4.82	4.42	4.02	2.43	New [this study]			FMNH153275
	FMNH153277	Lophuromys zena	aquilus										Yes	Yes	36.8539	-1.14514	Nairobi	KE	Nairobi_KE_FMNH153277	FMNH: 153277	1963	Male	Old adult	57.23	29.23	15.2	13.33	12.22	8.65	7.15	6.89	6.35	6.34	5.46	5.14	4.97	4.53	3.22	New [this study]			FMNH153277
	FMNH153278	Lophuromys zena	aquilus										Yes		36.8539	-1.14514	Nairobi	KE	Nairobi_KE_FMNH153278	FMNH: 153278	1963	Female	Young adult		27.59	13.61	12.24	11.38	7.78	7.06	6.41	6.25	5.82	5.24	4.98	4.67	4.27	2.7	New [this study]			FMNH153278
	FMNH153280	Lophuromys zena	aquilus										Yes	Yes	36.8539	-1.14514	Nairobi	KE	Nairobi_KE_FMNH153280	FMNH: 153280	1963	Female	Young adult	50.64	25.84	13.23	12.26	10.26	7.48	7.19	6.35	5.68	5.66	4.87	4.81	4.66	4.25	2.84	New [this study]			FMNH153280
	FMNH153281	Lophuromys zena	aquilus										Yes		36.8539	-1.14514	Nairobi	KE	Nairobi_KE_FMNH153281	FMNH: 153281	1963	Female	Young adult		27.92	13.94	12.81	11.59	7.88	7.25	6.47	6.39	6.1	5.47	4.94	4.92	3.9	2.97	New [this study]			FMNH153281
	FMNH153282	Lophuromys zena	aquilus										Yes	Yes	36.8539	-1.14514	Nairobi	KE	Nairobi_KE_FMNH153282	FMNH: 153282	1963		Young adult	51.04	26.19	13.36	12.56	10.43	7.38	7.03	6.47	5.8	5.76	5.18	4.89	4.55	4.28	2.69	New [this study]			FMNH153282
	FMNH153283	Lophuromys zena	aquilus										Yes	Yes	36.8282	-1.23874	Nairobi	KE	Nairobi_KE_FMNH153283	FMNH: 153283	1963	Female	Old adult	56.29	28.91	15.36	12.18	12.15	8.14	6.72	7.24	6.06	6.23	5.36	5.16	5.03	4.68	2.87	New [this study]			FMNH153283
	FMNH153284	Lophuromys zena	aquilus										Yes	Yes	35.1167	1.23333	Kapenguria	KE	Kapenguria_KE_FMNH153284	FMNH: 153284	1965	Female	Old adult	57.26	29.32	15.07	12.62	12.25	8.24	6.84	6.87	6.69	5.99	5.3	5.27	5.07	4.17	2.95	New [this study]			FMNH153284
	FMNH153289	Lophuromys zena	aquilus										Yes	Yes	35.1167	1.23333	Kapenguria	KE	Kapenguria_KE_FMNH153289	FMNH: 153289	1965		Adult	56.46	28.63	14.88	12.95	11.95	8.42	7	6.85	6.98	6.53	5.34	4.91	4.93	3.67	3.3	New [this study]			FMNH153289
	FMNH153290	Lophuromys zena	aquilus										Yes	Yes	35.1167	1.23333	Kapenguria	KE	Kapenguria_KE_FMNH153290	FMNH: 153290	1965	Male	Old adult	60.55	30.63	15.96	13.45	13.14	8.61	7.26	7.13	7	6.27	5.38	5.25	5.02	4.31	3.67	New [this study]			FMNH153290
	FMNH153291	Lophuromys zena	aquilus										Yes	Yes	35.5071	1.23333	Kapenguria	KE	Kapenguria_KE_FMNH153291	FMNH: 153291	1965	Female	Young adult	50.71	25.67	13.12	12.07	10.11	7.04	6.76	6.46	5.61	5.99	5.48	5.08	4.82	4.28	2.71	New [this study]			FMNH153291
	FMNH16844	Lophuromys zena	aquilus										Yes	Yes	36.5667	-0.93333	Kijabe	KE	Kijabe_KE_FMNH16844	FMNH: 16844	1906	Male	Adult	59.27	29.77	15.05	12.78	12.47	8.7	7.35	7.14	6.79	6.15	5.46	5.25	5.17	4.34	3.33	New [this study]			FMNH16844
	FMNH16846	Lophuromys zena	aquilus										Yes	Yes	36.5667	-0.93333	Kijabe	KE	Kijabe_KE_FMNH16846	FMNH: 16846	1906	Male	Adult	59.16	30.03	15.67	13.52	12.43	8.85	7.59	7.42	6.52	6.2	5.44	4.95	5.44	4.75	3.26	New [this study]			FMNH16846
	FMNH16848	Lophuromys zena	aquilus										Yes	Yes	36.3637	-0.69682	Naivasha	KE	Naivasha_KE_FMNH16848	FMNH: 16848	1906	Male	Adult	56.77	28.89	15.21	12.7	12.62	8	7.31	6.86	6.72	5.99	5.55	5.21	5.05	3.59	3.1	New [this study]			FMNH16848
	FMNH16851	Lophuromys zena	aquilus										Yes	Yes	36.5667	-0.93333	Kijabe	KE	Kijabe_KE_FMNH16851	FMNH: 16851	1906	Male	Old adult	57.73	29.34	15.43	13.42	12.05	8.77	7.17	6.97	7.02	6.07	5.14	4.71	4.99	4.29	2.97	New [this study]			FMNH16851
	FMNH16853	Lophuromys zena	aquilus										Yes		36.3637	-0.69682	Naivasha	KE	Naivasha_KE_FMNH16853	FMNH: 16853	1906	Female	Young adult		27.79	14.66	12.95	12.02	7.56	7.11	6.66	6.68	6.08	5.66	5.31	4.95	3.89	2.88	New [this study]			FMNH16853
	FMNH16854	Lophuromys zena	aquilus										Yes	Yes	36.3637	-0.69682	Naivasha	KE	Naivasha_KE_FMNH16854	FMNH: 16854	1906	Female	Young adult	53.77	27.27	14.33	12.81	11.32	7.06	7.13	6.84	6.24	5.88	5.76	5.07	4.89	3.68	2.94	New [this study]			FMNH16854
	FMNH16855	Lophuromys zena	aquilus										Yes	Yes	36.3637	-0.69682	Naivasha	KE	Naivasha_KE_FMNH16855	FMNH: 16855	1906	Female	Adult	56.85	28.56	15.24	12.86	11.84	8.08	7.38	6.9	6.87	6.08	5.56	5.01	5.03	4.27	3.51	New [this study]			FMNH16855
	FMNH16856	Lophuromys zena	aquilus										Yes	Yes	36.3637	-0.69682	Naivasha	KE	Naivasha_KE_FMNH16856	FMNH: 16856	1906	Male	Young adult	54.74	27.87	14.17	12.65	11.48	7.65	7.45	6.52	6.68	6.12	5.47	5.13	4.9	3.86	3.31	New [this study]			FMNH16856
	FMNH16857	Lophuromys zena	aquilus										Yes		36.5667	-0.93333	Kijabe	KE	Kijabe_KE_FMNH16857	FMNH: 16857	1906	Male	Adult		29.29	14.98	13.11	11.62	8.45	7.24	6.77	6.96	5.77	5.42	5.18	4.72	4.27	3.38	New [this study]			FMNH16857
	FMNH16858	Lophuromys zena	aquilus										Yes	Yes	36.5667	-0.93333	Kijabe	KE	Kijabe_KE_FMNH16858	FMNH: 16858	1906	Female	Adult	54.27	27.46	14.23	12.99	10.78	7.92	7	6.72	6.09	5.9	5.25	5.07	4.79	4.57	2.94	New [this study]			FMNH16858
	FMNH16859	Lophuromys zena	aquilus										Yes		36.5667	-0.93333	Kijabe	KE	Kijabe_KE_FMNH16859	FMNH: 16859	1906	Male	Adult		29.44	15.37	12.96	12.48	8.66	7.71	7.08	6.48	6.26	5.64	4.93	5	4.9	3.2	New [this study]			FMNH16859
	FMNH16862	Lophuromys zena	aquilus										Yes		35.738	-0.2426	Mau	KE	Molo_KE_FMNH16862	FMNH: 16862	1906	Female	Adult		28.76	15.11	12.7	11.81	8.42	6.98	6.86	6.5	6.08	5.71	5.04	4.96	4.16	3.23	New [this study]			FMNH16862
	FMNH16863	Lophuromys zena	aquilus										Yes		36.5667	-0.93333	Kijabe	KE	Kijabe_KE_FMNH16863	FMNH: 16863	1906	Female	Adult		28.53	14.75	12.9	12.5	8.1	7.34	6.79	6.51	6.19	5.4	4.83	4.76	3.84	2.74	New [this study]			FMNH16863
	FMNH16864	Lophuromys zena	aquilus										Yes	Yes	36.3637	-0.69682	Naivasha	KE	Naivasha_KE_FMNH16864	FMNH: 16864	1906	Male	Young adult	54.02	27.59	14.68	12.46	11.6	7.82	6.81	6.67	6.47	5.71	5.08	4.6	4.92	3.73	3.01	New [this study]			FMNH16864
	FMNH16865	Lophuromys zena	aquilus										Yes	Yes	36.5667	-0.93333	Kijabe	KE	Kijabe_KE_FMNH16865	FMNH: 16865	1906	Female	Adult	57.19	29.16	15.52	13.08	11.68	8.4	7.27	7.24	6.66	6.17	5.23	5.24	5.14	4.72	3.3	New [this study]			FMNH16865
	FMNH16868	Lophuromys zena	aquilus										Yes	Yes	35.738	-0.2426	Mau	KE	Molo_KE_FMNH16868	FMNH: 16868	1906	Male	Adult	60.13	30.34	15.79	13.68	12.71	8.68	7.52	7.23	6.82	6.53	5.49	5.42	5.43	4.51	3.57	New [this study]			FMNH16868
	FMNH16870	Lophuromys zena	aquilus										Yes	Yes	35.738	-0.2426	Mau	KE	Molo_KE_FMNH16870	FMNH: 16870	1906	Male	Adult	59.67	30.42	15.61	12.9	12.58	8.66	7.8	7.21	6.52	6.64	5.86	5.18	5.47	4.59	3.49	New [this study]			FMNH16870
	FMNH16871	Lophuromys zena	aquilus										Yes	Yes	35.738	-0.2426	Mau	KE	Molo_KE_FMNH16871	FMNH: 16871	1906	Male	Adult	58.94	29.62	15.51	13.71	12.37	8.54	7.52	6.9	6.43	6.81	5.48	5.22	5.14	4.55	3.27	New [this study]			FMNH16871
	FMNH16873	Lophuromys zena	aquilus										Yes	Yes	35.738	-0.2426	Mau	KE	Molo_KE_FMNH16873	FMNH: 16873	1906	Female	Old adult	59.08	29.5	15.61	13.11	12.14	8.58	7.43	7.05	7.14	6.29	5.4	5.5	5.16	4.15	3.62	New [this study]			FMNH16873
	FMNH16874	Lophuromys zena	aquilus										Yes	Yes	35.738	-0.2426	Mau	KE	Molo_KE_FMNH16874	FMNH: 16874	1906	Female	Old adult	58.89	29.81	15.27	12.29	13.11	8.11	7.24	7.03	6.46	6.02	5.27	5.42	4.98	4.35	3.51	New [this study]			FMNH16874
	FMNH16875	Lophuromys zena	aquilus										Yes	Yes	35.738	-0.2426	Mau	KE	Molo_KE_FMNH16875	FMNH: 16875	1906	Male	Adult	57.06	28.87	14.72	12.61	12.24	8.26	7.43	6.52	6.55	5.93	5.08	5.15	4.68	4.27	3.12	New [this study]			FMNH16875
	FMNH16876	Lophuromys zena	aquilus										Yes	Yes	35.738	-0.2426	Mau	KE	Molo_KE_FMNH16876	FMNH: 16876	1906	Male	Adult	58.71	29.57	15.65	13.09	12.49	8.55	7.54	7.22	6.95	6.42	5.46	5.17	5.19	4.13	3.1	New [this study]			FMNH16876
	FMNH16877	Lophuromys zena	aquilus										Yes	Yes	35.738	-0.2426	Mau	KE	Molo_KE_FMNH16877	FMNH: 16877	1906	Female	Adult	56.99	28.49	15.06	13.44	11.69	7.93	7.27	6.81	6.67	6.19	5.31	5.46	5.01	4.28	3.33	New [this study]			FMNH16877
	FMNH190318	Lophuromys zena	aquilus										Yes	Yes	36.7131	-0.93904	Aberdare	KE	Aberdares_KE_FMNH190318	FMNH: 190318	2006	Female	Old adult	55.21	28.1	15.02	12.49	11.86	8.39	6.9	6.81	6.11	5.89	5.14	4.51	4.73	4.25	2.98	New [this study]			FMNH190318
	FMNH190321	Lophuromys zena	aquilus										Yes	Yes	36.7131	-0.93904	Aberdare	KE	Aberdares_KE_FMNH190321	FMNH: 190321	2006	Female	Young adult	54.02	27.44	13.81	12.37	11.18	7.61	7.08	6.38	6.29	5.88	5.4	4.76	4.61	4.09	2.84	New [this study]			FMNH190321
	FMNH190324	Lophuromys zena	aquilus										Yes	Yes	36.7131	-0.93904	Aberdare	KE	Aberdares_KE_FMNH190324	FMNH: 190324	2006	Female	Adult	54.14	27.5	14.22	12.6	11.58	7.73	6.89	6.57	6.15	5.83	5.21	4.84	4.38	4.05	3.09	New [this study]			FMNH190324
	FMNH190325	Lophuromys zena	aquilus										Yes	Yes	36.7131	-0.93904	Aberdare	KE	Aberdares_KE_FMNH190325	FMNH: 190325	2006	Female	Adult	54.87	28.26	14.58	12.51	11.65	8.14	6.72	6.6	6.38	5.85	5.25	4.9	5.1	4.21	3.16	New [this study]			FMNH190325
	FMNH190327	Lophuromys zena	aquilus										Yes	Yes	36.7131	-0.93904	Aberdare	KE	Aberdares_KE_FMNH190327	FMNH: 190327	2006	Female	Adult	55.44	28.22	14.66	12.73	11.41	8.16	6.74	6.58	6.29	5.73	5.38	5.04	4.6	4.35	2.99	New [this study]			FMNH190327
	FMNH190332	Lophuromys zena	aquilus										Yes		36.7015	-0.23905	Aberdare	KE	Aberdares_KE_FMNH190332	FMNH: 190332	2006	Female	Adult		28.7	15.32	13.21	12.26	8.16	7.32	6.94	6.61	5.81	5.63	4.85	4.9	4.2	3.11	GenBank	MN808300		FMNH190332
	FMNH190339	Lophuromys zena	aquilus	H_110	34	36	Yes								-0.23943	36.7087	Aberdares	KE	Aberdares_KE_FMNH190339																				GenBank	MN808306		FMNH190339
	FMNH190340	Lophuromys zena	aquilus	H_110	34	36	Yes								-0.23943	36.7087	Aberdares	KE	Aberdares_KE_FMNH190340																				New [this study]			FMNH190340
	FMNH190341	Lophuromys zena	aquilus	H_123	34	36	Yes						Yes	Yes	-0.23943	36.7087	Aberdares	KE	Aberdares_KE_FMNH190341	FMNH: 190341	2006	Female		58.05	29.54	15.61	13.12	12.13	8.71	7.6	6.96	6.76	6.51	5.62	4.96	5.1	4.25	3.36	New [this study]			FMNH190341
	FMNH190342	Lophuromys zena	aquilus	H_110	34	36	Yes								-0.23943	36.7087	Aberdares	KE	Aberdares_KE_FMNH190342																				New [this study]			FMNH190342
	FMNH190344	Lophuromys zena	aquilus	H_123	34	36	Yes								-0.38328	36.7066	Aberdares	KE	Aberdares_KE_FMNH190344																				GenBank	MN808307		FMNH190344
	FMNH190345	Lophuromys zena	aquilus	H_135	34	37	Yes								-0.38328	36.7066	Aberdares	KE	Aberdares_KE_FMNH190345																				GenBank	MN808299		FMNH190345
	FMNH190349	Lophuromys zena	aquilus										Yes	Yes	36.6801	-0.30582	Aberdare	KE	Aberdares_KE_FMNH190349	FMNH: 190349	2006	Female	Young adult	51.03	25.7	13.43	11.43	10.82	7.17	6.88	6.46	5.77	5.84	5.53	4.84	4.51	4.93	3.47	New [this study]			FMNH190349
	FMNH190352	Lophuromys zena	aquilus										Yes		36.6801	-0.30582	Aberdare	KE	Aberdares_KE_FMNH190352	FMNH: 190352	2006	Female	Adult		27.24	14.19	12.27	10.6	7.99	7.45	6.57	6.68	5.8	5.01	5.03	4.58	4.27	2.83	New [this study]			FMNH190352
	FMNH190358	Lophuromys zena	aquilus				Yes						Yes	Yes	36.6801	-0.30582	Aberdare	KE	Aberdares_KE_FMNH190358	FMNH: 190358	2006	Male	Old adult	55.87	28.44	14.86	12.57	12.35	8.35	6.84	6.61	6.53	5.71	5.39	4.54	4.69	3.89	3.1	New [this study]			FMNH190358
	FMNH190371	Lophuromys zena	aquilus	H_110	34	36	Yes								-0.38328	36.7066	Aberdares	KE	Aberdares_KE_FMNH190371																				GenBank	MN808302		FMNH190371
	FMNH190383	Lophuromys zena	aquilus										Yes	Yes	36.6801	-0.30582	Aberdare	KE	Aberdares_KE_FMNH190383	FMNH: 190383	2006	Female	Old adult	56.64	28.54	15.98	12.9	11.56	8.45	7.39	7.21	6.74	6.24	5.84	5.04	5.19	4.28	3.03	New [this study]			FMNH190383
	FMNH190384	Lophuromys zena	aquilus										Yes	Yes	36.6801	-0.30582	Aberdare	KE	Aberdares_KE_FMNH190384	FMNH: 190384	2006	Male	Young adult	53.75	27.53	14.42	12.67	10.99	8.2	7	6.64	6.48	6.13	5.7	4.86	4.73	4.08	2.85	New [this study]			FMNH190384
	FMNH190390	Lophuromys zena	aquilus										Yes	Yes	36.6801	-0.30582	Aberdare	KE	Aberdares_KE_FMNH190390	FMNH: 190390	2006	Female	Adult	55.77	28.47	14.31	12.63	11.87	8.41	6.58	6.61	6.86	5.72	5.65	4.66	4.54	4.05	3.26	New [this study]			FMNH190390
	FMNH190391	Lophuromys zena	aquilus										Yes	Yes	36.6801	-0.30582	Aberdare	KE	Aberdares_KE_FMNH190391	FMNH: 190391	2006	Male	Adult	54.5	27.75	14.37	12.61	11.67	7.72	7.55	6.56	6.12	5.96	5.6	4.99	4.64	4.15	2.84	New [this study]			FMNH190391
	FMNH190396	Lophuromys zena	aquilus										Yes	Yes	36.6801	-0.30582	Aberdare	KE	Aberdares_KE_FMNH190396	FMNH: 190396	2006	Female	Adult	53.61	27.21	14.15	12.74	10.93	7.77	7.12	6.58	5.86	6.09	5.53	4.81	4.61	4.51	2.75	New [this study]			FMNH190396
	FMNH190637	Lophuromys zena	aquilus										Yes	Yes	36.6801	-0.30582	Aberdare	KE	Aberdares_KE_FMNH190637	FMNH: 190637	2006	Male	Young adult	53.03	27.17	13.93	12.85	11.31	7.64	7.17	6.58	5.9	6.25	5.27	5.03	4.54	4.09	2.77	New [this study]			FMNH190637
	FMNH190638	Lophuromys zena	aquilus										Yes	Yes	36.6801	-0.30582	Aberdare	KE	Aberdares_KE_FMNH190638	FMNH: 190638	2006	Female	Adult	53.74	27.28	14.55	12.77	10.95	7.73	6.91	6.36	6.73	5.9	5.02	5.01	4.5	3.85	2.63	New [this study]			FMNH190638
	FMNH190639	Lophuromys zena	aquilus										Yes	Yes	36.6801	-0.30582	Aberdare	KE	Aberdares_KE_FMNH190639	FMNH: 190639	2006	Male	Adult	56.6	28.62	14.93	12.84	11.91	8.51	7.15	6.89	6.67	6.36	5.52	5.12	5.04	4.04	3.12	New [this study]			FMNH190639
	FMNH190640	Lophuromys zena	aquilus	H_113	34	36	Yes			Yes			Yes	Yes	-0.38328	36.7066	Aberdares	KE	FMNH190640	FMNH: 190640	2006	Male	Adult	57.46	29.36	15.42	13.08	12.22	8.38	7.42	6.98	6.85	6.09	5.79	5.21	4.62	4.58	3.14	GenBank	KR089027		FMNH190640
	FMNH202097	Lophuromys zena	aquilus										Yes	Yes	34.8926	0.30243	Kakamega	KE	Kakamega_KE_FMNH202097	FMNH: 202097	1963	Female	Young adult	55.33	28.02	14.62	12.88	11.29	7.66	7.36	6.8	6.36	6.34	5.31	5.05	5.23	4.24	3.05	New [this study]			FMNH202097
	FMNH209855	Lophuromys zena	aquilus										Yes		35.491	-0.6417	Mau	KE	Bomet_KE_FMNH209855	FMNH: 209855	2010	Male	Adult		28.6	14.75	12.85	11.94	8.09	7.35	6.65	6.29	5.99	5.46	5.14	4.81	4.21	2.95	New [this study]			FMNH209855
	FMNH209857	Lophuromys zena	aquilus										Yes		35.491	-0.6417	Mau	KE	Bomet_KE_FMNH209857	FMNH: 209857	2010	Female	Adult		28.51	14.95	12.37	11.56	8.33	7.08	6.74	6.45	6.11	5.39	5.31	4.58	4.19	2.88	New [this study]			FMNH209857
	FMNH209870	Lophuromys zena	aquilus										Yes	Yes	35.491	-0.6417	Mau	KE	Bomet_KE_FMNH209870	FMNH: 209870	2010	Female	Young adult	57.15	28.67	14.88	12.57	11.98	8.14	6.88	6.51	6.69	5.61	5.26	4.95	4.8	4.14	3.04	New [this study]			FMNH209870
	FMNH209950	Lophuromys zena	aquilus	H_117	34	36	Yes			Yes					-0.29412	35.4491	Mau	KE	Mau_KE_FMNH209950																				New [this study]			FMNH209950
	FMNH209955	Lophuromys zena	aquilus	H_110	34	36	Yes			Yes			Yes	Yes	-0.29412	35.4491	Mau	KE	Mau_KE_FMNH209955	FMNH: 209955	2010	Male	Adult	56.59	28.98	15.67	12.67	12.38	8.14	7.28	7.02	6.48	6.23	5.43	5.08	4.93	3.84	3.46	New [this study]			FMNH209955
	FMNH209957	Lophuromys zena	aquilus				Yes						Yes	Yes	35.4491	-0.29412	Mau	KE	Bomet_KE_FMNH209957	FMNH: 209957	2010	Female	Old adult	57.16	29.07	15.09	12.49	12.64	8.23	6.92	6.73	6.45	5.95	5.05	5	4.91	4.57	3.16	New [this study]			FMNH209957
	FMNH210356	Lophuromys zena	aquilus										Yes	Yes	35.491	-0.6417	Mau	KE	Bomet_KE_FMNH210356	FMNH: 210356	2010	Female	Young adult	52.07	26.12	13.76	12.51	10.63	7.39	7.34	6.56	6.02	5.78	5.33	5.09	4.48	3.85	2.66	New [this study]			FMNH210356
	FMNH210357	Lophuromys zena	aquilus										Yes	Yes	35.491	-0.6417	Mau	KE	Bomet_KE_FMNH210357	FMNH: 210357	2010	Female	Young adult	51.69	26.15	13.65	12.31	10.43	7.3	6.78	6.19	6.18	5.84	4.91	4.76	4.39	4.12	2.75	New [this study]			FMNH210357
	FMNH210359	Lophuromys zena	aquilus										Yes	Yes	35.491	-0.6417	Mau	KE	Bomet_KE_FMNH210359	FMNH: 210359	2010	Male	Adult	55.95	28.48	14.5	12.71	11.71	8.16	7.14	6.67	6.5	5.62	5.45	4.92	4.71	4.18	2.91	New [this study]			FMNH210359
	FMNH210365	Lophuromys zena	aquilus										Yes	Yes	35.491	-0.6417	Mau	KE	Bomet_KE_FMNH210365	FMNH: 210365	2010	Female	Adult	55.89	28.5	15.1	12.56	11.32	8.21	7.24	6.77	6.51	5.98	5.58	4.93	4.91	4.76	2.96	New [this study]			FMNH210365
	FMNH217008	Lophuromys zena	aquilus										Yes	Yes	37.2399	-0.07365	Chogoria	KE	MtKenya_KE_FMNH217008	FMNH: 217008	2011	Male	Young adult	52.29	26.15	14	12.46	12.18	8.52	7.4	7.05	6.66	6.2	5.78	4.89	5.38	4.54	3.18	New [this study]			FMNH217008
	FMNH217009	Lophuromys zena	aquilus										Yes	Yes	37.2399	-0.07365	Chogoria	KE	MtKenya_KE_FMNH217009	FMNH: 217009	2011	Male	Old adult	57.47	29.15	15.08	12.48	12.05	8.66	7.55	7.04	6.66	6.23	5.37	4.93	5.38	4.44	3.21	New [this study]			FMNH217009
	FMNH217019	Lophuromys zena	aquilus	H_110	34	36	Yes								-0.16263	37.4462	MtKenya	KE	Chogoria_KE_FMNH217019																				New [this study]			FMNH217019
	FMNH217030	Lophuromys zena	aquilus										Yes	Yes	37.2399	-0.07365	Chogoria	KE	MtKenya_KE_FMNH217030	FMNH: 217030	2011	Female	Adult	57.75	29.39	14.56	13.2	12.13	8.28	7.56	6.85	6.64	6.03	5.66	5.17	4.9	4.39	3.23	New [this study]			FMNH217030
	FMNH217034	Lophuromys zena	aquilus										Yes	Yes	37.2399	-0.07365	Chogoria	KE	MtKenya_KE_FMNH217034	FMNH: 217034	2011	Female	Old adult	58.63	29.12	15.5	13.4	12.57	8.14	7.46	7.33	6.2	6.37	5.3	5.09	4.98	4.48	3	New [this study]			FMNH217034
	FMNH217108	Lophuromys zena	aquilus				Yes						Yes	Yes	37.2399	-0.07365	Chogoria	KE	MtKenya_KE_FMNH217108	FMNH: 217108	2011	Male	Young adult	56.73	28.89	14.57	12.78	11.9	8.46	7.16	6.69	6.48	5.93	5.54	4.86	4.77	4.38	3.16	New [this study]			FMNH217108
	FMNH217112	Lophuromys zena	aquilus										Yes	Yes	37.2399	-0.07365	Chogoria	KE	MtKenya_KE_FMNH217112	FMNH: 217112	2011	Male	Old adult	57.67	29.37	15.29	13	12.57	8.74	7.67	7.16	6.95	6.19	5.59	4.83	4.64	4.17	3.09	New [this study]			FMNH217112
	FMNH217113	Lophuromys zena	aquilus										Yes	Yes	37.2399	-0.07365	Chogoria	KE	MtKenya_KE_FMNH217113	FMNH: 217113	2011	Female	Old adult	56.05	28.76	15	12.87	11.93	8.49	7.51	7.24	6.62	5.91	5.44	4.86	4.66	4.31	2.99	New [this study]			FMNH217113
	FMNH217115	Lophuromys zena	aquilus	H_110	34	40	Yes			Yes					1.07718	34.7247	Elgon	KE	Elgon_KE_FMNH217115																				New [this study]			FMNH217115
	FMNH217119	Lophuromys zena	aquilus	H_110	34	40	Yes								1.07718	34.7247	Elgon	KE	Elgon_KE_FMNH217119																				New [this study]			FMNH217119
	FMNH217122	Lophuromys zena	aquilus										Yes	Yes	34.7358	1.1576	Elgon	KE	Elgon_KE_FMNH217122	FMNH: 217122	2011	Male	Young adult	55.46	27.97	14.3	13.04	11.42	7.95	7.06	6.51	6.65	5.98	5.28	5.09	4.49	3.92	3.06	New [this study]			FMNH217122
	FMNH217123	Lophuromys zena	aquilus	H_110	34	40	Yes								1.07718	34.7247	Elgon	KE	Elgon_KE_FMNH217123																				New [this study]			FMNH217123
	FMNH217132	Lophuromys zena	aquilus										Yes	Yes	34.7358	1.1576	Elgon	KE	Elgon_KE_FMNH217132	FMNH: 217132	2011	Male	Old adult	57.59	29.64	15.12	12.62	12.84	8.33	6.99	7.11	6.67	6.17	5.44	5.09	5.09	4.24	3.47	New [this study]			FMNH217132
	FMNH217134	Lophuromys zena	aquilus										Yes	Yes	34.7358	1.1576	Elgon	KE	Elgon_KE_FMNH217134	FMNH: 217134	2011	Male	Adult	58.95	29.76	15.85	12.74	12.55	8.86	7.5	7.02	6.95	6.22	5.32	5.07	5.28	4.24	3.22	New [this study]			FMNH217134
	FMNH217147	Lophuromys zena	aquilus	H_138	34	40	Yes			Yes					1.07718	34.7247	Elgon	KE	Elgon_KE_FMNH217147																				New [this study]			FMNH217147
	FMNH217152	Lophuromys zena	aquilus	H_110	34	40	Yes								1.07718	34.7247	Elgon	KE	Elgon_KE_FMNH217152																				New [this study]			FMNH217152
	FMNH217164	Lophuromys zena	aquilus	H_110	34	40	Yes								1.07718	34.7247	Elgon	KE	Elgon_KE_FMNH217164																				New [this study]			FMNH217164
	FMNH217165	Lophuromys zena	aquilus	H_110	34	40	Yes								1.07718	34.7247	Elgon	KE	Elgon_KE_FMNH217165																				New [this study]			FMNH217165
	FMNH217182	Lophuromys zena	aquilus										Yes	Yes	34.595	1.00251	Elgon	KE	Elgon_KE_FMNH217182	FMNH: 217182	2011	Female	Young adult	54.71	27.82	13.81	12.75	11.35	7.8	7.15	6.36	6.39	5.89	5.23	4.99	4.74	4.37	2.8	New [this study]			FMNH217182
	FMNH217197	Lophuromys zena	aquilus										Yes	Yes	34.595	1.00251	Elgon	KE	Elgon_KE_FMNH217197	FMNH: 217197	2011	Male	Old adult	60.61	30.96	15.58	12.86	13.34	8.61	7.03	7.05	6.58	6.43	5.38	5.52	4.73	4.32	3.74	New [this study]			FMNH217197
	FMNH217226	Lophuromys zena	aquilus	H_110	34	36	Yes			Yes					0.99973	35.4937	Cherangani	KE	Cherangani_KE_FMNH217226																				New [this study]			FMNH217226
	FMNH217227	Lophuromys zena	aquilus	H_111	34	36	Yes								0.99973	35.4937	Cherangani	KE	Cherangani_KE_FMNH217227																				New [this study]			FMNH217227
	FMNH217236	Lophuromys zena	aquilus										Yes	Yes	35.543	1.08495	Cherangani	KE	Cherangani_KE_FMNH217236	FMNH: 217236	2011	Female	Adult	56.6	28.53	14.63	12.87	11.74	8.23	7.19	7.1	6.73	5.99	5.69	5.26	5.2	4.25	3.07	New [this study]			FMNH217236
	FMNH217238	Lophuromys zena	aquilus										Yes	Yes	35.543	1.08495	Cherangani	KE	Cherangani_KE_FMNH217238	FMNH: 217238	2011	Female	Adult	54.82	27.35	15.14	12.69	11.36	7.78	6.89	6.54	6.04	5.88	5.3	4.91	4.55	4.18	3.04	New [this study]			FMNH217238
	FMNH217240	Lophuromys zena	aquilus	H_112	34	36	Yes								0.99973	35.4937	Cherangani	KE	Cherangani_KE_FMNH217240																				New [this study]			FMNH217240
	FMNH217244	Lophuromys zena	aquilus	H_110	34	36	Yes								0.99973	35.4937	Cherangani	KE	Cherangani_KE_FMNH217244																				New [this study]			FMNH217244
	FMNH217247	Lophuromys zena	aquilus										Yes	Yes	35.543	1.08495	Cherangani	KE	Cherangani_KE_FMNH217247	FMNH: 217247	2011	Male	Adult	55.36	28.41	14.29	12.35	12.27	8.36	6.66	6.37	6.67	5.93	5.3	4.86	4.46	3.93	2.89	New [this study]			FMNH217247
	FMNH217249	Lophuromys zena	aquilus										Yes	Yes	35.543	1.08495	Cherangani	KE	Cherangani_KE_FMNH217249	FMNH: 217249	2011	Male	Adult	56	28.21	14.5	12.41	11.9	7.94	7.06	6.54	6.67	6.13	5.41	4.86	4.79	3.72	2.9	New [this study]			FMNH217249
	FMNH217251	Lophuromys zena	aquilus	H_138	34	40	Yes			Yes					0.99973	35.4937	Cherangani	KE	Cherangani_KE_FMNH217251																				New [this study]			FMNH217251
	FMNH217594	Lophuromys zena	aquilus										Yes	Yes	35.543	1.08495	Cherangani	KE	Cherangani_KE_FMNH217594	FMNH: 217594	2011		Adult	56.4	28.6	15.54	13.5	11.64	8.5	7.11	6.86	6.08	5.97	5.11	4.92	4.89	4.62	3.42	New [this study]			FMNH217594
	FMNH217736	Lophuromys zena	aquilus										Yes	Yes	34.7181	1.06247	Elgon	KE	Elgon_KE_FMNH217736	FMNH: 217736	2009	Male	Old adult	56.62	28.47	15.03	12.88	12.29	8.12	7.16	6.86	6.3	6.05	5.11	5.09	4.86	4.33	2.98	New [this study]			FMNH217736
	FMNH217738	Lophuromys zena	aquilus										Yes	Yes	34.7181	1.06247	Elgon	KE	Elgon_KE_FMNH217738	FMNH: 217738	2009	Male	Adult	56.13	28.63	15.37	12.82	11.67	8.01	7.08	6.61	6.21	6.09	5.71	5	4.91	4.04	3.38	New [this study]			FMNH217738
	FMNH217740	Lophuromys zena	aquilus										Yes	Yes	34.7181	1.06247	Elgon	KE	Elgon_KE_FMNH217740	FMNH: 217740	2009	Female	Young adult	53.48	26.75	13.95	12.6	11.22	7.3	6.62	6.63	5.57	5.96	5.09	5.15	4.72	4.15	3.04	New [this study]			FMNH217740
	FMNH217748	Lophuromys zena	aquilus										Yes	Yes	34.7181	1.06247	Elgon	KE	Elgon_KE_FMNH217748	FMNH: 217748	2009	Female	Adult	54.73	28.01	14.19	12.49	11.46	7.79	7.39	6.7	5.94	5.76	5.44	5.39	4.95	4.42	3.25	New [this study]			FMNH217748
	FMNH217750	Lophuromys zena	aquilus										Yes	Yes	34.7181	1.06247	Elgon	KE	Elgon_KE_FMNH217750	FMNH: 217750	2009	Male	Adult	57.06	29.01	14.99	12.74	12.38	8.35	7.38	6.45	6.33	5.88	5.7	4.73	4.89	4.45	3.11	New [this study]			FMNH217750
	FMNH217786	Lophuromys zena	aquilus										Yes		34.7181	1.06247	Elgon	KE	Elgon_KE_FMNH217786	FMNH: 217786	2009	Female	Adult		28.55	15.11	13.26	10.1	8.09	7.24	6.9	6.87	5.83	5.42	5.21	4.84	4.28	3.26	New [this study]			FMNH217786
	FMNH230992	Lophuromys zena	aquilus										Yes	Yes	35.941	-1.84764	Loita	KE	Loita_KE_FMNH230992	FMNH: 230992	2015	Male	Young adult	49.78	25.57	12.97	11.79	10.29	7.29	6.87	6.18	5.77	5.46	5.08	4.61	4.26	4.04	2.79	New [this study]			FMNH230992
	FMNH230993	Lophuromys zena	aquilus	H_110	34	36	Yes	Yes	Yes		Yes	Yes	Yes	Yes	-1.84764	35.941	Loita	KE	Loita_KE_FMNH230993	FMNH: 230993	2015	Female	Adult	54.85	27.87	14.5	11.91	11.87	7.87	6.78	6.77	6.37	5.89	5.57	4.9	4.67	3.9	3.11	New [this study]			FMNH230993
	FMNH230995	Lophuromys zena	aquilus										Yes	Yes	35.941	-1.84764	Loita	KE	Loita_KE_FMNH230995	FMNH: 230995	2015	Male	Young adult	53.26	27.21	14.16	12.47	11.65	7.66	7.24	6.49	6.4	6.17	5.41	4.79	4.62	3.64	2.74	New [this study]			FMNH230995
	FMNH230997	Lophuromys zena	aquilus	H_127	34	36	Yes	Yes	Yes	Yes	Yes	Yes	Yes	Yes	-1.84764	35.941	Loita	KE	Loita_KE_FMNH230997	FMNH: 230997	2015	Male	Old adult	56.12	28.59	14.93	12.6	12.3	8.06	6.92	6.71	5.94	6.07	5.65	4.85	4.9	4.05	3.02	New [this study]			FMNH230997
	FMNH230999	Lophuromys zena	aquilus	H_110	34	36	Yes	Yes	Yes	Yes	Yes	Yes	Yes		-1.84764	35.941	Loita	KE	Loita_KE_FMNH230999	FMNH: 230999	2015	Female	Adult		28.77	14.88	12.34	12.47	8.31	7.04	6.89	6.58	5.84	5.94	4.64	4.78	4.03	3.19	New [this study]			FMNH230999
	FMNH231001	Lophuromys zena	aquilus	H_110	34	36	Yes	Yes			Yes		Yes	Yes	-1.84764	35.941	Loita	KE	Loita_KE_FMNH231001	FMNH: 231001	2015	Male	Adult	55.15	28.53	14.59	12.54	11.76	8.27	6.88	6.54	6.31	5.96	4.98	4.86	4.58	4.21	3.27	New [this study]			FMNH231001
	FMNH231002	Lophuromys zena	aquilus										Yes	Yes	35.941	-1.84764	Loita	KE	Loita_KE_FMNH231002	FMNH: 231002	2015	Male	Young adult	53.51	27.43	14.59	12.67	11.64	7.51	7.01	6.44	5.83	5.82	5.24	4.85	4.49	3.98	2.96	New [this study]			FMNH231002
	FMNH231003	Lophuromys zena	aquilus										Yes	Yes	35.941	-1.84764	Loita	KE	Loita_KE_FMNH231003	FMNH: 231003	2015	Female	Adult	55.53	28.2	14.93	12.45	11.81	7.97	7.32	6.74	6.49	5.96	5.65	5.08	4.83	4.36	3.17	New [this study]			FMNH231003
	FMNH231004	Lophuromys zena	aquilus										Yes		35.941	-1.84764	Loita	KE	Loita_KE_FMNH231004	FMNH: 231004	2015	Female	Young adult		27.11	13.81	12.49	11.51	7.57	6.88	6.3	6.1	5.88	5.27	4.82	4.48	4.03	3.2	New [this study]			FMNH231004
	FMNH231006	Lophuromys zena	aquilus										Yes	Yes	35.941	-1.84764	Loita	KE	Loita_KE_FMNH231006	FMNH: 231006	2015	Male	Old adult	55.37	28.47	14.48	12.05	11.84	8.25	6.76	6.57	6.45	5.91	5.45	4.71	4.89	3.98	3.33	New [this study]			FMNH231006
	FMNH231008	Lophuromys zena	aquilus										Yes	Yes	35.941	-1.84764	Loita	KE	Loita_KE_FMNH231008	FMNH: 231008	2015	Male	Old adult	56.94	28.99	15.05	12.33	11.99	8.66	7.04	6.6	6.73	6.03	5.16	4.85	4.84	4.02	3.3	New [this study]			FMNH231008
	FMNH231015	Lophuromys zena	aquilus										Yes	Yes	35.941	-1.84764	Loita	KE	Loita_KE_FMNH231015	FMNH: 231015	2015	Female	Young adult	53.27	26.98	14.17	11.92	10.91	7.75	6.59	6.33	6.32	5.69	4.97	4.71	4.66	4.21	3.08	New [this study]			FMNH231015
	FMNH231016	Lophuromys zena	aquilus										Yes	Yes	35.941	-1.84764	Loita	KE	Loita_KE_FMNH231016	FMNH: 231016	2015	Male	Adult	57.11	29.13	15.81	12.1	12.3	8.46	7.14	6.66	6.44	6.18	5.58	5.1	4.81	4.31	3.77	New [this study]			FMNH231016
	FMNH231017	Lophuromys zena	aquilus										Yes	Yes	35.941	-1.84764	Loita	KE	Loita_KE_FMNH231017	FMNH: 231017	2015	Male	Young adult	50.58	25.71	13.17	12.32	10.42	7.38	6.77	6.06	6.29	5.58	5.31	4.52	4.26	3.75	2.78	New [this study]			FMNH231017
	FMNH231018	Lophuromys zena	aquilus										Yes	Yes	35.941	-1.84764	Loita	KE	Loita_KE_FMNH231018	FMNH: 231018	2015	Female	Adult	55.01	27.77	14.78	12.78	11.71	8.33	7.05	6.53	6.38	5.56	5.16	4.67	4.39	4.05	2.99	New [this study]			FMNH231018
	FMNH231020	Lophuromys zena	aquilus										Yes		35.941	-1.84764	Loita	KE	Loita_KE_FMNH231020	FMNH: 231020	2015	Female	Old adult		29.03	14.89	12.58	12.56	8.33	7.12	6.81	6.36	5.68	5.26	5.06	4.77	3.91	3.22	New [this study]			FMNH231020
	FMNH231023	Lophuromys zena	aquilus										Yes	Yes	35.941	-1.84764	Loita	KE	Loita_KE_FMNH231023	FMNH: 231023	2015	Female	Adult	53.25	27.29	14.42	12.4	11.58	7.73	6.79	6.73	6.31	5.55	5.3	4.95	4.59	3.62	3.15	New [this study]			FMNH231023
	FMNH231285	Lophuromys zena	aquilus	H_131	34	37	Yes	Yes	Yes	Yes	Yes	Yes	Yes	Yes	0.30243	34.8926	Kakamega	KE	Kakamega_KE_FMNH231285	FMNH: 231285	2015	Female	Adult	58.98	30.22	15.46	12.78	12.75	9.04	7.23	7.12	6.86	6.63	5.7	5.34	4.92	4.49	3.67	New [this study]			FMNH231285
	FMNH231291	Lophuromys zena	aquilus	H_134	34	37	Yes	Yes	Yes		Yes	Yes	Yes		0.30243	34.8926	Kakamega	KE	Kakamega_KE_FMNH231291	FMNH: 231291	2015	Female	Adult		30.22	15.52	13.2	12.63	8.91	7.6	6.86	7.08	6.3	5.62	4.98	4.88	4.06	3.29	New [this study]			FMNH231291
	FMNH231300	Lophuromys zena	aquilus	H_132	34	37	Yes	Yes	Yes		Yes	Yes	Yes	Yes	0.39111	34.8931	Kakamega	KE	Kakamega_KE_FMNH231300	FMNH: 231300	2015	Male	Adult	58.85	30.25	15.11	12.86	12.89	8.77	7.17	6.93	6.3	5.75	5.63	5.02	4.86	4.8	3.25	New [this study]			FMNH231300
	FMNH231303	Lophuromys zena	aquilus				Yes	Yes	Yes				Yes	Yes	34.8926	0.30243	Kakamega	KE	Kakamega_KE_FMNH231303	FMNH: 231303	2015	Male	Adult	60.72	31.18	15.38	13.31	13.52	9.07	7.27	7.12	6.73	6.49	5.72	5.09	5.42	4.76	3.24	New [this study]			FMNH231303
	FMNH231782	Lophuromys zena	aquilus										Yes	Yes	37.2775	1.235	Matthews	KE	Matthews_KE_FMNH231782	FMNH: 231782	2005	Male	Adult	57.34	29.26	14.89	12.98	12.24	8.34	7.08	6.52	6.5	6.25	5.31	4.87	5.09	4.14	3.11	New [this study]			FMNH231782
	FMNH231784	Lophuromys zena	aquilus										Yes	Yes	37.2775	1.235	Matthews	KE	Matthews_KE_FMNH231784	FMNH: 231784	2005	Female	Young adult	54.46	27.55	14.31	12.55	11.73	7.82	6.79	6.46	6.31	6.09	5.1	4.66	4.91	3.69	2.94	New [this study]			FMNH231784
	FMNH231785	Lophuromys zena	aquilus										Yes	Yes	37.2775	1.235	Matthews	KE	Matthews_KE_FMNH231785	FMNH: 231785	2005	Female	Young adult	50.89	25.84	13.56	12.3	10.67	6.96	6.54	6.3	5.82	6.01	4.92	4.8	4.61	3.97	2.53	New [this study]			FMNH231785
	FMNH231786	Lophuromys zena	aquilus										Yes	Yes	37.2775	1.235	Matthews	KE	Matthews_KE_FMNH231786	FMNH: 231786	2005	Female	Young adult	54.15	27.24	13.76	12.71	11.49	7.6	6.84	6.49	6.12	6.19	4.94	4.72	4.8	3.84	2.76	New [this study]			FMNH231786
	FMNH231787	Lophuromys zena	aquilus										Yes	Yes	37.2775	1.235	Matthews	KE	Matthews_KE_FMNH231787	FMNH: 231787	2005	Female	Young adult	50.72	25.9	13.11	12.21	10.68	7.04	6.49	6.36	5.65	5.87	4.89	4.69	4.36	4.02	2.64	New [this study]			FMNH231787
	FMNH231788	Lophuromys zena	aquilus										Yes	Yes	37.2775	1.235	Matthews	KE	Matthews_KE_FMNH231788	FMNH: 231788	2005	Female	Adult	55.69	27.94	14.29	12.69	12.03	7.94	6.84	6.8	6.29	6.13	5.36	4.58	4.72	4.08	3.23	New [this study]			FMNH231788
	FMNH231789	Lophuromys zena	aquilus										Yes	Yes	37.2775	1.235	Matthews	KE	Matthews_KE_FMNH231789	FMNH: 231789	2005	Male	Adult	55.57	28.12	14.6	12.45	11.73	7.85	6.88	6.76	6.41	6.2	4.99	4.92	4.72	3.99	3.01	New [this study]			FMNH231789
	FMNH43811	Lophuromys zena	aquilus										Yes	Yes	34.95	0.2	Kakamega	KE	Kakamega_KE_FMNH43811	FMNH: 43811	1912	Female	Adult	55.12	27.8	14.48	12.6	11.69	7.62	6.96	6.98	6.17	5.83	5.15	5.32	4.66	3.79	3.23	New [this study]			FMNH43811
	FMNH43812	Lophuromys zena	aquilus										Yes	Yes	34.95	0.2	Kakamega	KE	Kakamega_KE_FMNH43812	FMNH: 43812	1912	Female	Adult	55.68	28.22	14.44	12.64	11.6	7.92	7.08	7.08	7.22	6.07	5.13	5.07	4.9	3.83	3.04	New [this study]			FMNH43812
	FMNH43813	Lophuromys zena	aquilus										Yes	Yes	37.4	0.95	Matthews	KE	Matthews_KE_FMNH43813	FMNH: 43813	1911	Female	Young adult	50.67	25.76	13.59	12.29	10.21	7.27	6.59	6.32	7.01	5.69	5.57	4.68	4.65	3.78	2.83	New [this study]			FMNH43813
	FMNH43814	Lophuromys zena	aquilus										Yes	Yes	37.4	0.95	Matthews	KE	Matthews_KE_FMNH43814	FMNH: 43814	1911	Male	Adult	56.01	28.47	14.72	12.74	11.59	8.23	7.3	6.97	6.96	6.05	5.03	5.01	5.21	4.07	3.2	New [this study]			FMNH43814
	FMNH85335	Lophuromys zena	aquilus										Yes		35.9333	-0.33333	Mau	KE	Molo_KE_FMNH85335	FMNH: 85335	1948	Male	Old adult		31.41	16.62	13.01	14.02	9.13	7.51	7.43	6.59	6.63	5.5	5.24	5.36	4.94	3.35	New [this study]			FMNH85335
	FMNH85336	Lophuromys zena	aquilus										Yes	Yes	35.9333	-0.33333	Mau	KE	Molo_KE_FMNH85336	FMNH: 85336	1948	Male	Adult	58.3	29.26	15.24	13.46	11.98	8.53	7.2	6.92	6.62	5.9	5.36	5.11	5.19	4.21	3.08	New [this study]			FMNH85336
	FMNH86264	Lophuromys zena	aquilus										Yes		36.658	-1.25514	Nairobi	KE	Nairobi_KE_FMNH86264	FMNH: 86264	1956	Female	Adult		27.93	14.34	12.37	11.86	8.46	7.03	6.27	6.38	5.6	5.04	4.49	4.91	4.12	3.15	New [this study]			FMNH86264
	FMNH86270	Lophuromys zena	aquilus										Yes	Yes	36.658	-1.25514	Nairobi	KE	Nairobi_KE_FMNH86270	FMNH: 86270	1956	Female	Young adult	50.89	26.05	13.36	12.03	10.22	7.39	6.75	6.18	5.61	5.36	5.03	4.76	4.28	4.7	2.82	New [this study]			FMNH86270
	FMNH86273	Lophuromys zena	aquilus										Yes	Yes	36.658	-1.25514	Nairobi	KE	Nairobi_KE_FMNH86273	FMNH: 86273	1956	Female	Young adult	50.51	25.9	13.79	12.55	10.38	7.25	6.86	6.33	5.7	5.56	5.05	4.73	4.37	4.16	2.79	New [this study]			FMNH86273
	FMNH86279	Lophuromys zena	aquilus										Yes	Yes	36.658	-1.25514	Nairobi	KE	Nairobi_KE_FMNH86279	FMNH: 86279	1956	Female	Adult	55.57	28.55	14.44	12.78	11.52	8.24	7.1	6.83	5.85	6.1	5.55	4.91	4.83	4.51	3.18	New [this study]			FMNH86279
	FMNH86289	Lophuromys zena	aquilus										Yes	Yes	36.658	-1.25514	Nairobi	KE	Nairobi_KE_FMNH86289	FMNH: 86289	1956	Female	Young adult	56.62	27.12	14.1	12.34	11.15	8.04	6.8	6.54	5.72	5.6	5.01	4.74	4.42	3.96	3.09	New [this study]			FMNH86289
	FMNH86291	Lophuromys zena	aquilus										Yes	Yes	36.658	-1.25514	Nairobi	KE	Nairobi_KE_FMNH86291	FMNH: 86291	1956	Male	Old adult	58.9	29	14.65	12.27	12.16	8.95	7.05	6.74	6.23	5.79	5.54	4.91	4.61	4.58	3.09	New [this study]			FMNH86291
	FMNH86471	Lophuromys zena	aquilus										Yes		36.658	-1.25514	Nairobi	KE	Nairobi_KE_FMNH86471	FMNH: 86471	1956	Female	Old adult		29.81	15.01	12.74	12.41	8.94	7.28	6.63	6.21	5.89	5.73	4.87	4.82	4.94	3.23	New [this study]			FMNH86471
	K10LMAR	Lophuromys zena	aquilus	H_134	34	37	Yes			Yes					0.45656	35.5144	Kaptagat	KE	Kaptagat_KE_K10LMAR																				African Mammalia			K10LMAR
	KE10	Lophuromys zena	aquilus	H_110	34	37	Yes								-0.16263	37.4462	MtKenya	KE	Mt_KE10																				African Mammalia			KE10
	KE2	Lophuromys zena	aquilus	H_110	34	37	Yes								-0.16263	37.4462	MtKenya	KE	Mt_KE2																				African Mammalia			KE2
	KE20150001	Lophuromys zena	aquilus						Yes				Yes		37.587	-0.24	Chogoria	KE	Chogoria_KE_MK15001	KIZ-NMK: 20150001	2015	Male			29.2	15.39	12.56	12.47	8.55	7.16	6.94	6.37	6.23	5.67	4.53	4.86	4.46	3.16	New [this study]			KE20150001
	KE20150095	Lophuromys zena	aquilus						Yes				Yes		37.5554	-0.23393	Chogoria	KE	Chogoria_KE_MK15095	KIZ-NMK: 20150095	2015	Male	old adult		29.1	15.4	12.87	12.48	8.68	7.52	7.08	6.71	6	5.62	4.59	4.86	3.91	2.76	New [this study]			KE20150095
	KE20150139	Lophuromys zena	aquilus	H_110	34	36	Yes		Yes			Yes			-0.23549	37.5552	MtKenya	KE	KE20150139																				New [this study]			KE20150139
	KE20150188	Lophuromys zena	aquilus	H_110	34	37	Yes		Yes			Yes			-0.22743	37.5293	MtKenya	KE	KE20150188																				New [this study]			KE20150188
	KE20150308	Lophuromys zena	aquilus	H_123	34	36	Yes		Yes	Yes		Yes			-0.18977	37.4747	MtKenya	KE	KE20150308																				New [this study]			KE20150308
	KE20150354	Lophuromys zena	aquilus				Yes						Yes		37.4745	-0.18815	Chogoria	KE	Chogoria_KE_MK15354	KIZ-NMK: 20150354	2015	Male	adult		29.78	15.69	12.88	12.61	8.57	7.11	6.91	6.72	6.39	5.92	4.81	5.5	4.48	3.17	New [this study]			KE20150354
	KE20150361	Lophuromys zena	aquilus										Yes		37.4745	-0.18815	Chogoria	KE	Chogoria_KE_MK15361	KIZ-NMK: 20150361	2015	Female	old adult		30.05	16.21	13.26	12.29	8.63	7.48	7.26	6.75	6.12	5.73	5.11	5.16	4.63	3.34	New [this study]			KE20150361
	KE20150428	Lophuromys zena	aquilus						Yes				Yes		37.4591	-0.17477	Chogoria	KE	Chogoria_KE_MK15428	KIZ-NMK: 20150428	2015	Male	adult		29.38	15.46	12.99	12.03	8.62	7.48	7.21	6.26	6.19	5.39	4.98	4.87	5.09	2.95	New [this study]			KE20150428
	KE20150432	Lophuromys zena	aquilus	H_110	34	36	Yes						Yes		-0.17441	37.4592	MtKenya	KE	KE20150432	KIZ-NMK: 20150432	2015	Male	adult		27.65	14.8	12.92	11.57	7.69	7.16	6.84	6.37	6.39	5.33	4.93	4.85	4.03	3.09	New [this study]			KE20150432
	KE20150572	Lophuromys zena	aquilus	H_110	34	36	Yes	Yes	Yes		Yes	Yes	Yes		-0.15036	37.3948	MtKenya	KE	KE20150572	KIZ-NMK: 20150572	2015	Male	adult		30.73	15.48	12.81	12.99	8.91	7.57	7.11	6.94	6.34	5.66	5.13	5.3	4.45	3.11	New [this study]			KE20150572
	KE20150596	Lophuromys zena	aquilus										Yes		37.4003	-0.15152	Chogoria	KE	Chogoria_KE_MK15596	KIZ-NMK: 20150596	2015	Female	young adult		28.82	15.02	12.8	11.77	8.43	7.34	6.92	6.49	6.17	5.55	4.87	5.11	4.21	2.91	New [this study]			KE20150596
	KE20150607	Lophuromys zena	aquilus	H_110	34	37	Yes	Yes	Yes		Yes	Yes			-0.15248	37.397	MtKenya	KE	KE20150607																				New [this study]			KE20150607
	KE20150611	Lophuromys zena	aquilus						Yes				Yes		37.4005	-0.15382	Chogoria	KE	Chogoria_KE_MK15611	KIZ-NMK: 20150611	2015	Female	old adult		29.9	15	12.56	12.31	8.85	7.45	7.03	6.87	6.14	5.73	4.6	5.19	4.27	3.05	New [this study]			KE20150611
	KE20150673	Lophuromys zena	aquilus	H_110	34	36	Yes		Yes			Yes			-0.14689	37.42	MtKenya	KE	KE20150673																				New [this study]			KE20150673
	KE20150720	Lophuromys zena	aquilus	H_123	34	36	Yes	Yes	Yes		Yes	Yes			-0.14311	37.4148	MtKenya	KE	KE20150720																				New [this study]			KE20150720
	KE20150732	Lophuromys zena	aquilus	H_110	34	37	Yes	Yes	Yes	Yes	Yes	Yes			-0.14261	37.4155	MtKenya	KE	KE20150732																				New [this study]			KE20150732
	KE20150762	Lophuromys zena	aquilus				Yes		Yes				Yes		37.4472	-0.16271	Chogoria	KE	Chogoria_KE_MK15762	KIZ-NMK: 20150762	2015	Female	young adult		27.71	14.75	12.89	11.58	7.54	7.11	6.68	5.92	6.01	5.64	5.03	4.86	4.5	3.04	New [this study]			KE20150762
	KE20150861	Lophuromys zena	aquilus	H_110	34	37	Yes	Yes	Yes	Yes	Yes	Yes			-0.15821	37.4488	MtKenya	KE	KE20150861																				New [this study]			KE20150861
	KE20150950	Lophuromys zena	aquilus						Yes				Yes		37.3101	-0.08128	Sirimon	KE	Sirimon_KE_MK15950	KIZ-NMK: 20150950	2015	Female	adult		28.01	14.87	12.06	12.24	8.14	7.24	6.87	6.43	5.7	5.48	4.75	5.08	4.1	2.63	New [this study]			KE20150950
	KE20150951	Lophuromys zena	aquilus	H_136	34	37	Yes	Yes	Yes		Yes	Yes			-0.08459	37.31	MtKenya	KE	KE20150951																				New [this study]			KE20150951
	KE20150952	Lophuromys zena	aquilus										Yes		37.3092	-0.07805	Sirimon	KE	Sirimon_KE_MK15952	KIZ-NMK: 20150952	2015	Male	adult		28.59	14.72	12.58	12.26	8.2	7.28	7.01	6.65	6.17	5.52	4.84	5.05	4.05	2.75	New [this study]			KE20150952
	KE20151016	Lophuromys zena	aquilus	H_110	34	36	Yes						Yes		-0.06885	37.3071	MtKenya	KE	KE20151016	KIZ-NMK: 20151016	2015	Male	young adult		27.98	14.51	12.86	11.37	8.11	7.18	6.84	6.44	5.8	5.62	4.74	4.96	4.19	3.16	New [this study]			KE20151016
	KE20151017	Lophuromys zena	aquilus				Yes		Yes				Yes		37.306	-0.06883	Sirimon	KE	Sirimon_KE_MK151017	KIZ-NMK: 20151017	2015	Male	old adult		29.93	15.67	12.83	12.7	8.51	7.36	6.99	6.71	6.45	5.86	5.15	5.3	4.69	3.17	New [this study]			KE20151017
	KE20151045	Lophuromys zena	aquilus										Yes		37.306	-0.06883	Sirimon	KE	Sirimon_KE_MK151045	KIZ-NMK: 20151045	2015	Female	young adult		27.26	14.11	12.58	11.13	7.69	7.29	6.88	6.04	6.13	5.38	4.86	4.97	4.31	2.82	New [this study]			KE20151045
	KE20151057	Lophuromys zena	aquilus										Yes		37.306	-0.06883	Sirimon	KE	Sirimon_KE_MK151057	KIZ-NMK: 20151057	2015	Male	young adult		27.82	14.87	12.77	11.76	7.89	7.18	6.55	6.63	5.96	5.54	4.64	5	3.9	2.85	New [this study]			KE20151057
	KE20151161	Lophuromys zena	aquilus				Yes	Yes	Yes				Yes		37.2989	-0.0565	Sirimon	KE	Sirimon_KE_MK151161	KIZ-NMK: 20151161	2015	Male	adult		26.69	14.09	12.29	10.99	7.62	7	6.61	6.2	5.62	5.36	4.45	4.65	3.92	2.62	New [this study]			KE20151161
	KE20151281	Lophuromys zena	aquilus										Yes		37.2934	-0.04875	Sirimon	KE	Sirimon_KE_MK151281	KIZ-NMK: 20151281	2015	Female	adult		28.09	14.68	12.33	11.58	8.29	7.5	6.64	6.48	5.91	5.85	4.49	5.27	4.45	2.88	New [this study]			KE20151281
	KE20151303	Lophuromys zena	aquilus										Yes		37.2889	-0.05134	Sirimon	KE	Sirimon_KE_MK151303	KIZ-NMK: 20151303	2015	Male	old adult		28.75	14.48	12.3	12.37	8.21	6.77	6.58	6.51	5.93	5.87	4.48	4.73	3.96	3.1	New [this study]			KE20151303
	KE20151353	Lophuromys zena	aquilus	H_110	34	36	Yes						Yes		-0.02967	37.2833	MtKenya	KE	KE20151353	KIZ-NMK: 20151353	2015	Female	old adult		29.57	15.22	12.32	12.41	8.47	7.21	7.33	6.51	5.93	6	5.08	5.28	4.17	2.91	New [this study]			KE20151353
	KE20151354	Lophuromys zena	aquilus						Yes				Yes		37.2855	-0.02961	Sirimon	KE	Sirimon_KE_MK151354	KIZ-NMK: 20151354	2015	Female	adult		27.65	14.75	12.42	11.34	8.28	7.02	6.65	6.65	5.93	5.56	4.61	4.9	4.15	2.91	New [this study]			KE20151354
	KE20151357	Lophuromys zena	aquilus	H_129	34	36	Yes			Yes			Yes		-0.02971	37.282	MtKenya	KE	KE20151357	KIZ-NMK: 20151357	2015	Male	adult		28.07	14.98	13.18	11.82	7.98	7.22	6.76	5.74	6.43	5.55	4.73	4.73	4.38	3.17	New [this study]			KE20151357
	KE20151374	Lophuromys zena	aquilus	H_110	34	36	Yes	Yes	Yes	Yes	Yes	Yes			-0.02756	37.2849	MtKenya	KE	KE20151374																				New [this study]			KE20151374
	KE20151392	Lophuromys zena	aquilus										Yes		37.2853	-0.03158	Sirimon	KE	Sirimon_KE_MK151392	KIZ-NMK: 20151392	2015	Male	young adult		27.23	14.18	12.5	11.27	7.76	6.89	6.57	6.29	6.03	5.4	4.67	4.89	3.8	2.94	New [this study]			KE20151392
	KE20151393	Lophuromys zena	aquilus						Yes				Yes		37.2853	-0.03158	Sirimon	KE	Sirimon_KE_MK151393	KIZ-NMK: 20151393	2015	Female	young adult		27.15	14.2	12.52	11.61	7.79	7.02	6.66	6.89	6.31	5.58	4.7	5	3.48	2.96	New [this study]			KE20151393
	KE20151453	Lophuromys zena	aquilus										Yes		37.2786	-0.01953	Sirimon	KE	Sirimon_KE_MK151453	KIZ-NMK: 20151453	2015		young adult		27.67	14.6	12.61	11.41	8.03	6.92	6.76	6.41	5.72	5.34	4.99	4.73	4.34	2.82	New [this study]			KE20151453
	KE20151454	Lophuromys zena	aquilus	H_121	34	36	Yes						Yes		-0.01875	37.277	MtKenya	KE	KE20151454	KIZ-NMK: 20151454	2015		old adult		28.04	14.72	12.58	11.92	8.37	7.38	6.89	6.98	6.01	5.32	4.74	5.01	3.7	2.79	New [this study]			KE20151454
	KE20151455	Lophuromys zena	aquilus										Yes		37.2786	-0.01953	Sirimon	KE	Sirimon_KE_MK151455	KIZ-NMK: 20151455	2015	Male	adult		28.15	14.6	12.62	11.88	8.06	6.9	7.11	6.66	6	5.45	4.82	4.84	3.98	3	New [this study]			KE20151455
	KE20151603	Lophuromys zena	aquilus	H_121	34	36	Yes	Yes	Yes		Yes	Yes			-0.00697	37.2656	MtKenya	KE	KE20151603																				New [this study]			KE20151603
	KE20151801	Lophuromys zena	aquilus										Yes		37.2445	0.00371	Sirimon	KE	Sirimon_KE_MK151801	KIZ-NMK: 20151801	2015	Male	young adult		27.24	14.92	13.34	11.58	7.42	7.1	6.51	6	5.75	5.18	4.57	4.64	3.93	3	New [this study]			KE20151801
	KE20151848	Lophuromys zena	aquilus						Yes				Yes		37.2458	-0.01078	Sirimon	KE	Sirimon_KE_MK151848	KIZ-NMK: 20151848	2015	Male	old adult		28.74	15.09	12.57	12.51	8.19	7.27	6.84	6.2	6.15	5.68	4.88	4.96	4.15	3.11	New [this study]			KE20151848
	KE2018010028	Lophuromys zena	aquilus	H_110	34	36	Yes								-1.79497	35.8973	Loita	KE	KE2018010028	KIZ-NMK: 2018010028																			New [this study]			KE2018010028
	KE2018010031	Lophuromys zena	aquilus	H_110	34	36	Yes								-1.79571	35.8978	Loita	KE	KE2018010031	KIZ-NMK: 2018010031																			New [this study]			KE2018010031
	KE2018010047	Lophuromys zena	aquilus	H_110	34	36	Yes								-1.78368	35.898	Loita	KE	KE2018010047	KIZ-NMK: 2018010047																			New [this study]			KE2018010047
	KE2018010071	Lophuromys zena	aquilus	H_110	34	36	Yes								-1.78504	35.8991	Loita	KE	KE2018010071	KIZ-NMK: 2018010071																			New [this study]			KE2018010071
	KE2018010114	Lophuromys zena	aquilus	H_110	34	36	Yes								-1.78796	35.8987	Loita	KE	KE2018010114	KIZ-NMK: 2018010114																			New [this study]			KE2018010114
	KE2018010130	Lophuromys zena	aquilus	H_118	34	36	Yes								-1.82931	35.8888	Loita	KE	KE2018010130	KIZ-NMK: 2018010130																			New [this study]			KE2018010130
	KE2018010160	Lophuromys zena	aquilus	H_110	34	36	Yes			Yes					-1.82871	35.8895	Loita	KE	KE2018010160	KIZ-NMK: 2018010160																			New [this study]			KE2018010160
	KE2018010180	Lophuromys zena	aquilus	H_124	34	36	Yes								-1.82797	35.8871	Loita	KE	KE2018010180	KIZ-NMK: 2018010180																			New [this study]			KE2018010180
	KE2018010186	Lophuromys zena	aquilus	H_110	34	36	Yes								-1.82865	35.8905	Loita	KE	KE2018010186	KIZ-NMK: 2018010186																			New [this study]			KE2018010186
	KE2018010213	Lophuromys zena	aquilus	H_110	34	36	Yes								-1.82915	35.8884	Loita	KE	KE2018010213	KIZ-NMK: 2018010213																			New [this study]			KE2018010213
	KE2018010233	Lophuromys zena	aquilus	H_110	34	36	Yes								-1.82803	35.8873	Loita	KE	KE2018010233	KIZ-NMK: 2018010233																			New [this study]			KE2018010233
	KE2018010257	Lophuromys zena	aquilus	H_110	34	36	Yes								-1.84986	35.892	Loita	KE	KE2018010257	KIZ-NMK: 2018010257																			New [this study]			KE2018010257
	KE2018010307	Lophuromys zena	aquilus	H_110	34	36	Yes								-1.85314	35.8898	Loita	KE	KE2018010307	KIZ-NMK: 2018010307																			New [this study]			KE2018010307
	KE2018010364	Lophuromys zena	aquilus	H_110	34	36	Yes								-1.84962	35.8921	Loita	KE	KE2018010364	KIZ-NMK: 2018010364																			New [this study]			KE2018010364
	KE2018010421	Lophuromys zena	aquilus	H_128	34	36	Yes								-1.99123	35.9104	Loita	KE	KE2018010421	KIZ-NMK: 2018010421																			New [this study]			KE2018010421
	KE2018010422	Lophuromys zena	aquilus	H_125	34	36	Yes								-1.9912	35.9107	Loita	KE	KE2018010422	KIZ-NMK: 2018010422																			New [this study]			KE2018010422
	KE2018010467	Lophuromys zena	aquilus	H_110	34	36	Yes								-1.99112	35.9113	Loita	KE	KE2018010467	KIZ-NMK: 2018010467																			New [this study]			KE2018010467
	KE2018010482	Lophuromys zena	aquilus	H_110	34	36	Yes								-1.99259	35.908	Loita	KE	KE2018010482	KIZ-NMK: 2018010482																			New [this study]			KE2018010482
	KE2018010502	Lophuromys zena	aquilus	H_110	34	36	Yes								-1.96725	35.8844	Loita	KE	KE2018010502	KIZ-NMK: 2018010502																			New [this study]			KE2018010502
	KE2018010554	Lophuromys zena	aquilus	H_110	34	36	Yes								-1.97754	35.8893	Loita	KE	KE2018010554	KIZ-NMK: 2018010554																			New [this study]			KE2018010554
	KE2018010570	Lophuromys zena	aquilus	H_110	34	36	Yes			Yes					-1.79962	35.7727	Loita	KE	KE2018010570	KIZ-NMK: 2018010570																			New [this study]			KE2018010570
	KE2018010604	Lophuromys zena	aquilus	H_110	34	36	Yes								-1.83635	35.8177	Loita	KE	KE2018010604	KIZ-NMK: 2018010604																			New [this study]			KE2018010604
	KE2018010614	Lophuromys zena	aquilus	H_110	34	36	Yes								-1.83759	35.8166	Loita	KE	KE2018010614	KIZ-NMK: 2018010614																			New [this study]			KE2018010614
	KE2018010638	Lophuromys zena	aquilus	H_110	34	36	Yes			Yes					-1.91249	35.8674	Loita	KE	KE2018010638	KIZ-NMK: 2018010638																			New [this study]			KE2018010638
	KE2018010661	Lophuromys zena	aquilus	H_110	34	36	Yes								-1.91176	35.8694	Loita	KE	KE2018010661	KIZ-NMK: 2018010661																			New [this study]			KE2018010661
	KE2018010697	Lophuromys zena	aquilus	H_117	34	36	Yes								-1.89014	35.8826	Loita	KE	KE2018010697	KIZ-NMK: 2018010697																			New [this study]			KE2018010697
	KE2018010775	Lophuromys zena	aquilus	H_110	34	36	Yes								-1.89013	35.8824	Loita	KE	KE2018010775	KIZ-NMK: 2018010775																			New [this study]			KE2018010775
	KE2018010779	Lophuromys zena	aquilus	H_110	34	36	Yes			Yes					-1.89013	35.8822	Loita	KE	KE2018010779	KIZ-NMK: 2018010779																			New [this study]			KE2018010779
	KE2018080010	Lophuromys zena	aquilus	H_117	34	36	Yes								-0.75229	35.5395	Mau	KE	KE2018080010	KIZ-NMK: 2018080010																			New [this study]			KE2018080010
	KE2018080012	Lophuromys zena	aquilus	H_121	34	36	Yes								-0.75221	35.5396	Mau	KE	KE2018080012	KIZ-NMK: 2018080012																			New [this study]			KE2018080012
	KE2018080013	Lophuromys zena	aquilus	H_117	34	36	Yes								-0.75217	35.5397	Mau	KE	KE2018080013	KIZ-NMK: 2018080013																			New [this study]			KE2018080013
	KE2018080014	Lophuromys zena	aquilus	H_117	34	36	Yes								-0.75213	35.5398	Mau	KE	KE2018080014	KIZ-NMK: 2018080014																			New [this study]			KE2018080014
	KE2018080015	Lophuromys zena	aquilus	H_117	34	36	Yes								-0.75209	35.5398	Mau	KE	KE2018080015	KIZ-NMK: 2018080015																			New [this study]			KE2018080015
	KE2018080024	Lophuromys zena	aquilus	H_117	34	36	Yes								-0.75277	35.5389	Mau	KE	KE2018080024	KIZ-NMK: 2018080024																			New [this study]			KE2018080024
	KE2018080025	Lophuromys zena	aquilus	H_110	34	36	Yes								-0.75267	35.5391	Mau	KE	KE2018080025	KIZ-NMK: 2018080025																			New [this study]			KE2018080025
	KE2018080039	Lophuromys zena	aquilus	H_110	34	36	Yes								-0.76796	35.5638	Mau	KE	KE2018080039	KIZ-NMK: 2018080039																			New [this study]			KE2018080039
	KE2018080041	Lophuromys zena	aquilus	H_126	34	36	Yes								-0.76783	35.5629	Mau	KE	KE2018080041	KIZ-NMK: 2018080041																			New [this study]			KE2018080041
	KE2018080044	Lophuromys zena	aquilus	H_110	34	36	Yes								-0.76764	35.5617	Mau	KE	KE2018080044	KIZ-NMK: 2018080044																			New [this study]			KE2018080044
	KE2018080046	Lophuromys zena	aquilus	H_120	34	36	Yes								-0.76751	35.5608	Mau	KE	KE2018080046	KIZ-NMK: 2018080046																			New [this study]			KE2018080046
	KE2018080075	Lophuromys zena	aquilus	H_110	34	36	Yes								-0.75211	35.5398	Mau	KE	KE2018080075	KIZ-NMK: 2018080075																			New [this study]			KE2018080075
	KE2018080076	Lophuromys zena	aquilus	H_110	34	36	Yes								-0.75205	35.5399	Mau	KE	KE2018080076	KIZ-NMK: 2018080076																			New [this study]			KE2018080076
	KE2018080077	Lophuromys zena	aquilus	H_110	34	36	Yes								-0.75199	35.54	Mau	KE	KE2018080077	KIZ-NMK: 2018080077																			New [this study]			KE2018080077
	KE2018080079	Lophuromys zena	aquilus	H_117	34	36	Yes								-0.75187	35.5402	Mau	KE	KE2018080079	KIZ-NMK: 2018080079																			New [this study]			KE2018080079
	KE2018080084	Lophuromys zena	aquilus	H_117	34	36	Yes								-0.75236	35.5399	Mau	KE	KE2018080084	KIZ-NMK: 2018080084																			New [this study]			KE2018080084
	KE2018080085	Lophuromys zena	aquilus	H_117	34	36	Yes								-0.75219	35.5404	Mau	KE	KE2018080085	KIZ-NMK: 2018080085																			New [this study]			KE2018080085
	KE2018080101	Lophuromys zena	aquilus	H_110	34	36	Yes								-0.76654	35.5545	Mau	KE	KE2018080101	KIZ-NMK: 2018080101																			New [this study]			KE2018080101
	KE2018080110	Lophuromys zena	aquilus	H_110	34	36	Yes								-0.68207	35.5818	Mau	KE	KE2018080110	KIZ-NMK: 2018080110																			New [this study]			KE2018080110
	KE2018080111	Lophuromys zena	aquilus	H_110	34	36	Yes								-0.68196	35.582	Mau	KE	KE2018080111	KIZ-NMK: 2018080111																			New [this study]			KE2018080111
	KE2018080112	Lophuromys zena	aquilus	H_110	34	36	Yes								-0.68185	35.5822	Mau	KE	KE2018080112	KIZ-NMK: 2018080112																			New [this study]			KE2018080112
	KE2018080113	Lophuromys zena	aquilus	H_110	34	36	Yes			Yes					-0.68174	35.5824	Mau	KE	KE2018080113	KIZ-NMK: 2018080113																			New [this study]			KE2018080113
	KE2018080116	Lophuromys zena	aquilus	H_126	34	36	Yes								-0.68142	35.583	Mau	KE	KE2018080116	KIZ-NMK: 2018080116																			New [this study]			KE2018080116
	KE2018080126	Lophuromys zena	aquilus	H_110	34	36	Yes								-0.68262	35.5806	Mau	KE	KE2018080126	KIZ-NMK: 2018080126																			New [this study]			KE2018080126
	KE2018080130	Lophuromys zena	aquilus	H_110	34	36	Yes								-0.68255	35.5807	Mau	KE	KE2018080130	KIZ-NMK: 2018080130																			New [this study]			KE2018080130
	KE2018080131	Lophuromys zena	aquilus	H_110	34	36	Yes								-0.68253	35.5808	Mau	KE	KE2018080131	KIZ-NMK: 2018080131																			New [this study]			KE2018080131
	KE2018080133	Lophuromys zena	aquilus	H_110	34	36	Yes								-0.6825	35.5808	Mau	KE	KE2018080133	KIZ-NMK: 2018080133																			New [this study]			KE2018080133
	KE2018080141	Lophuromys zena	aquilus	H_110	34	36	Yes								-0.68246	35.5803	Mau	KE	KE2018080141	KIZ-NMK: 2018080141																			New [this study]			KE2018080141
	KE2018080142	Lophuromys zena	aquilus	H_110	34	36	Yes								-0.68246	35.5802	Mau	KE	KE2018080142	KIZ-NMK: 2018080142																			New [this study]			KE2018080142
	KE2018080143	Lophuromys zena	aquilus	H_110	34	36	Yes								-0.68246	35.5801	Mau	KE	KE2018080143	KIZ-NMK: 2018080143																			New [this study]			KE2018080143
	KE2018080158	Lophuromys zena	aquilus	H_110	34	36	Yes								-0.68283	35.5809	Mau	KE	KE2018080158	KIZ-NMK: 2018080158																			New [this study]			KE2018080158
	KE2018080160	Lophuromys zena	aquilus	H_110	34	36	Yes								-0.68286	35.5808	Mau	KE	KE2018080160	KIZ-NMK: 2018080160																			New [this study]			KE2018080160
	KE2018080161	Lophuromys zena	aquilus	H_117	34	36	Yes								-0.68288	35.5808	Mau	KE	KE2018080161	KIZ-NMK: 2018080161																			New [this study]			KE2018080161
	KE2018080174	Lophuromys zena	aquilus	H_117	34	36	Yes								-0.68246	35.5803	Mau	KE	KE2018080174	KIZ-NMK: 2018080174																			New [this study]			KE2018080174
	KE2018080195	Lophuromys zena	aquilus	H_117	34	36	Yes								-0.68249	35.5808	Mau	KE	KE2018080195	KIZ-NMK: 2018080195																			New [this study]			KE2018080195
	KE2018080197	Lophuromys zena	aquilus	H_117	34	36	Yes								-0.68246	35.5808	Mau	KE	KE2018080197	KIZ-NMK: 2018080197																			New [this study]			KE2018080197
	KE2018080207	Lophuromys zena	aquilus	H_110	34	36	Yes								-0.63325	35.7079	Mau	KE	KE2018080207	KIZ-NMK: 2018080207																			New [this study]			KE2018080207
	KE2018080228	Lophuromys zena	aquilus	H_110	34	36	Yes								-0.63438	35.7088	Mau	KE	KE2018080228	KIZ-NMK: 2018080228																			New [this study]			KE2018080228
	KE2018080248	Lophuromys zena	aquilus	H_110	34	36	Yes								-0.63441	35.7088	Mau	KE	KE2018080248	KIZ-NMK: 2018080248																			New [this study]			KE2018080248
	KE2018080259	Lophuromys zena	aquilus	H_117	34	36	Yes								-0.6325	35.7084	Mau	KE	KE2018080259	KIZ-NMK: 2018080259																			New [this study]			KE2018080259
	KE2018080280	Lophuromys zena	aquilus	H_110	34	36	Yes								-0.63441	35.7088	Mau	KE	KE2018080280	KIZ-NMK: 2018080280																			New [this study]			KE2018080280
	KE2018080281	Lophuromys zena	aquilus	H_121	34	36	Yes								-0.63444	35.7087	Mau	KE	KE2018080281	KIZ-NMK: 2018080281																			New [this study]			KE2018080281
	KE2018080283	Lophuromys zena	aquilus	H_117	34	36	Yes								-0.63449	35.7087	Mau	KE	KE2018080283	KIZ-NMK: 2018080283																			New [this study]			KE2018080283
	KE2018080314	Lophuromys zena	aquilus	H_110	34	36	Yes								-0.62244	35.7176	Mau	KE	KE2018080314	KIZ-NMK: 2018080314																			New [this study]			KE2018080314
	KE2018080316	Lophuromys zena	aquilus	H_121	34	36	Yes								-0.62269	35.7179	Mau	KE	KE2018080316	KIZ-NMK: 2018080316																			New [this study]			KE2018080316
	KE2018080367	Lophuromys zena	aquilus	H_137	34	40	Yes								-0.07317	35.7703	Mau	KE	KE2018080367	KIZ-NMK: 2018080367																			New [this study]			KE2018080367
	KE2018080372	Lophuromys zena	aquilus	H_115	34	36	Yes								-0.07088	35.7699	Mau	KE	KE2018080372	KIZ-NMK: 2018080372																			New [this study]			KE2018080372
	KE2018080373	Lophuromys zena	aquilus	H_110	34	36	Yes								-0.07042	35.7698	Mau	KE	KE2018080373	KIZ-NMK: 2018080373																			New [this study]			KE2018080373
	KE2018080390	Lophuromys zena	aquilus	H_118	34	36	Yes								-0.07151	35.77	Mau	KE	KE2018080390	KIZ-NMK: 2018080390																			New [this study]			KE2018080390
	KE2018080405	Lophuromys zena	aquilus	H_138	34	40	Yes								-0.07156	35.7701	Mau	KE	KE2018080405	KIZ-NMK: 2018080405																			New [this study]			KE2018080405
	KE2018080406	Lophuromys zena	aquilus	H_110	34	40	Yes								-0.07169	35.7702	Mau	KE	KE2018080406	KIZ-NMK: 2018080406																			New [this study]			KE2018080406
	KE2018080407	Lophuromys zena	aquilus	H_117	34	36	Yes								-0.07181	35.7702	Mau	KE	KE2018080407	KIZ-NMK: 2018080407																			New [this study]			KE2018080407
	KE2018080441	Lophuromys zena	aquilus	H_139	34	40	Yes								-0.07088	35.7699	Mau	KE	KE2018080441	KIZ-NMK: 2018080441																			New [this study]			KE2018080441
	KE2018080442	Lophuromys zena	aquilus	H_134	34	37	Yes								-0.07057	35.7698	Mau	KE	KE2018080442	KIZ-NMK: 2018080442																			New [this study]			KE2018080442
	KE2018080484	Lophuromys zena	aquilus	H_139	34	40	Yes								-0.07915	35.7956	Mau	KE	KE2018080484	KIZ-NMK: 2018080484																			New [this study]			KE2018080484
	KE2018080492	Lophuromys zena	aquilus	H_118	34	40	Yes								-0.06941	35.7837	Mau	KE	KE2018080492	KIZ-NMK: 2018080492																			New [this study]			KE2018080492
	KE2018080510	Lophuromys zena	aquilus	H_110	34	36	Yes								-0.08449	35.7995	Mau	KE	KE2018080510	KIZ-NMK: 2018080510																			New [this study]			KE2018080510
	KE2018080512	Lophuromys zena	aquilus	H_134	34	37	Yes								-0.08457	35.799	Mau	KE	KE2018080512	KIZ-NMK: 2018080512																			New [this study]			KE2018080512
	KE2018080536	Lophuromys zena	aquilus	H_114	34	36	Yes								0.09955	35.6866	Mau	KE	KE2018080536	KIZ-NMK: 2018080536																			New [this study]			KE2018080536
	KE2018080556	Lophuromys zena	aquilus	H_110	34	36	Yes								0.09648	35.6947	Mau	KE	KE2018080556	KIZ-NMK: 2018080556																			New [this study]			KE2018080556
	KE2018080557	Lophuromys zena	aquilus	H_115	34	36	Yes								0.09645	35.6944	Mau	KE	KE2018080557	KIZ-NMK: 2018080557																			New [this study]			KE2018080557
	KE2018080582	Lophuromys zena	aquilus	H_110	34	36	Yes								0.10133	35.6869	Mau	KE	KE2018080582	KIZ-NMK: 2018080582																			New [this study]			KE2018080582
	KE2018080630	Lophuromys zena	aquilus	H_133	34	37	Yes								0.12747	35.6885	Mau	KE	KE2018080630	KIZ-NMK: 2018080630																			New [this study]			KE2018080630
	KE2018080647	Lophuromys zena	aquilus	H_133	34	37	Yes								0.1306	35.6896	Mau	KE	KE2018080647	KIZ-NMK: 2018080647																			New [this study]			KE2018080647
	KE2018080648	Lophuromys zena	aquilus	H_138	34	40	Yes								0.13097	35.6896	Mau	KE	KE2018080648	KIZ-NMK: 2018080648																			New [this study]			KE2018080648
	KE2018080663	Lophuromys zena	aquilus	H_114	34	36	Yes								0.12906	35.6878	Mau	KE	KE2018080663	KIZ-NMK: 2018080663																			New [this study]			KE2018080663
	KE2018080701	Lophuromys zena	aquilus	H_110	34	36	Yes								0.12996	35.6896	Mau	KE	KE2018080701	KIZ-NMK: 2018080701																			New [this study]			KE2018080701
	KE2018080712	Lophuromys zena	aquilus	H_134	34	37	Yes								0.13227	35.6895	Mau	KE	KE2018080712	KIZ-NMK: 2018080712																			New [this study]			KE2018080712
	KE2018080739	Lophuromys zena	aquilus	H_110	34	36	Yes								-0.36038	35.3778	Mau	KE	KE2018080739	KIZ-NMK: 2018080739																			New [this study]			KE2018080739
	KE2018080740	Lophuromys zena	aquilus	H_110	34	36	Yes								-0.36028	35.3779	Mau	KE	KE2018080740	KIZ-NMK: 2018080740																			New [this study]			KE2018080740
	KE2018080741	Lophuromys zena	aquilus	H_119	34	36	Yes								-0.36019	35.3781	Mau	KE	KE2018080741	KIZ-NMK: 2018080741																			New [this study]			KE2018080741
	KE2018080755	Lophuromys zena	aquilus	H_110	34	36	Yes								-0.35988	35.376	Mau	KE	KE2018080755	KIZ-NMK: 2018080755																			New [this study]			KE2018080755
	KE2018080757	Lophuromys zena	aquilus	H_110	34	36	Yes								-0.35959	35.376	Mau	KE	KE2018080757	KIZ-NMK: 2018080757																			New [this study]			KE2018080757
	KE2018080762	Lophuromys zena	aquilus	H_121	34	36	Yes								-0.35884	35.3762	Mau	KE	KE2018080762	KIZ-NMK: 2018080762																			New [this study]			KE2018080762
	KE2018080772	Lophuromys zena	aquilus	H_110	34	36	Yes								-0.37376	35.3587	Mau	KE	KE2018080772	KIZ-NMK: 2018080772																			New [this study]			KE2018080772
	KE2018080773	Lophuromys zena	aquilus	H_110	34	36	Yes								-0.37449	35.3599	Mau	KE	KE2018080773	KIZ-NMK: 2018080773																			New [this study]			KE2018080773
	KE2018080774	Lophuromys zena	aquilus	H_110	34	36	Yes								-0.37522	35.3611	Mau	KE	KE2018080774	KIZ-NMK: 2018080774																			New [this study]			KE2018080774
	KE2018080775	Lophuromys zena	aquilus	H_110	34	36	Yes								-0.37594	35.3623	Mau	KE	KE2018080775	KIZ-NMK: 2018080775																			New [this study]			KE2018080775
	KE2018080793	Lophuromys zena	aquilus	H_110	34	36	Yes								-0.37661	35.3634	Mau	KE	KE2018080793	KIZ-NMK: 2018080793																			New [this study]			KE2018080793
	KE2018080795	Lophuromys zena	aquilus	H_110	34	36	Yes								-0.37644	35.3631	Mau	KE	KE2018080795	KIZ-NMK: 2018080795																			New [this study]			KE2018080795
	KE2018080796	Lophuromys zena	aquilus	H_110	34	36	Yes								-0.37636	35.3629	Mau	KE	KE2018080796	KIZ-NMK: 2018080796																			New [this study]			KE2018080796
	KE2018080798	Lophuromys zena	aquilus	H_110	34	36	Yes								-0.37619	35.3626	Mau	KE	KE2018080798	KIZ-NMK: 2018080798																			New [this study]			KE2018080798
	KE2018080803	Lophuromys zena	aquilus	H_108	34	36	Yes								-0.37667	35.3636	Mau	KE	KE2018080803	KIZ-NMK: 2018080803																			New [this study]			KE2018080803
	KE2018080815	Lophuromys zena	aquilus	H_117	34	36	Yes								-0.36038	35.3778	Mau	KE	KE2018080815	KIZ-NMK: 2018080815																			New [this study]			KE2018080815
	KE2018080831	Lophuromys zena	aquilus	H_115	34	36	Yes								-0.3747	35.3602	Mau	KE	KE2018080831	KIZ-NMK: 2018080831																			New [this study]			KE2018080831
	KE2018080832	Lophuromys zena	aquilus	H_127	34	36	Yes								-0.37657	35.3633	Mau	KE	KE2018080832	KIZ-NMK: 2018080832																			New [this study]			KE2018080832
	KE2018080834	Lophuromys zena	aquilus	H_110	34	36	Yes								-0.38031	35.3693	Mau	KE	KE2018080834	KIZ-NMK: 2018080834																			New [this study]			KE2018080834
	KE2018080840	Lophuromys zena	aquilus	H_117	34	36	Yes								-0.37651	35.3633	Mau	KE	KE2018080840	KIZ-NMK: 2018080840																			New [this study]			KE2018080840
	KE2018080855	Lophuromys zena	aquilus	H_109	34	36	Yes								-0.36019	35.3781	Mau	KE	KE2018080855	KIZ-NMK: 2018080855																			New [this study]			KE2018080855
	KE2018080862	Lophuromys zena	aquilus	H_121	34	36	Yes								-0.35927	35.3761	Mau	KE	KE2018080862	KIZ-NMK: 2018080862																			New [this study]			KE2018080862
	KE2018080871	Lophuromys zena	aquilus	H_110	34	36	Yes								-0.37631	35.3629	Mau	KE	KE2018080871	KIZ-NMK: 2018080871																			New [this study]			KE2018080871
	KE2018080898	Lophuromys zena	aquilus	H_110	34	36	Yes			Yes					0.06193	34.1408	Yala	KE	KE2018080898	KIZ-NMK: 2018080898																			New [this study]			KE2018080898
	KE2018081064	Lophuromys zena	aquilus	H_133	34	37	Yes								0.35245	34.8641	Kakamega	KE	KE2018081064	KIZ-NMK: 2018081064																			New [this study]			KE2018081064
	KE2018081065	Lophuromys zena	aquilus	H_110	34	36	Yes			Yes					0.35234	34.8638	Kakamega	KE	KE2018081065	KIZ-NMK: 2018081065																			New [this study]			KE2018081065
	KE2018081080	Lophuromys zena	aquilus	H_134	34	37	Yes								0.35408	34.8679	Kakamega	KE	KE2018081080	KIZ-NMK: 2018081080																			New [this study]			KE2018081080
	KE2018081101	Lophuromys zena	aquilus	H_134	34	37	Yes			Yes					0.34871	34.8709	Kakamega	KE	KE2018081101	KIZ-NMK: 2018081101																			New [this study]			KE2018081101
	KE2018081150	Lophuromys zena	aquilus	H_110	34	36	Yes								0.34878	34.864	Kakamega	KE	KE2018081150	KIZ-NMK: 2018081150																			New [this study]			KE2018081150
	KE2018081194	Lophuromys zena	aquilus	H_110	34	36	Yes								0.34758	34.8644	Kakamega	KE	KE2018081194	KIZ-NMK: 2018081194																			New [this study]			KE2018081194
	KE208	Lophuromys zena	aquilus	H_123	34	36	Yes								-0.1614	37.446	MtKenya	KE	KE208																				Komarova et al., 2020			KE208
	KE221	Lophuromys zena	aquilus	H_110	34	37	Yes								-0.1614	37.446	MtKenya	KE	KE221																				Komarova et al., 2020			KE221
	KE226	Lophuromys zena	aquilus	H_110	34	36	Yes								-0.1614	37.446	MtKenya	KE	KE226																				Komarova et al., 2020			KE226
	KE234	Lophuromys zena	aquilus	H_110	34	37	Yes								-0.1614	37.446	MtKenya	KE	KE234																				Komarova et al., 2020			KE234
	KE3	Lophuromys zena	aquilus	H_110	34	37	Yes								-0.1614	37.446	MtKenya	KE	Mt_KE3																				Komarova et al., 2020			KE3
	KE315	Lophuromys zena	aquilus	H_110	34	36	Yes								-1.8511	35.8506	Loita	KE	KE315																				Komarova et al., 2020			KE315
	KE334	Lophuromys zena	aquilus	H_130	34	37	Yes								0.2428	34.8653	Kakamega	KE	KE334																				Komarova et al., 2020			KE334
	KE377	Lophuromys zena	aquilus	H_132	34	37	Yes								0.2528	34.8605	Kakamega	KE	KE377																				Komarova et al., 2020			KE377
	KE461	Lophuromys zena	aquilus	H_110	34	40	Yes								1.0637	34.7204	Elgon	KE	KE461																				Komarova et al., 2020			KE461
	KE463	Lophuromys zena	aquilus	H_110	34	40	Yes								1.0637	34.7204	Elgon	KE	KE463																				Komarova et al., 2020			KE463
	KE499	Lophuromys zena	aquilus	H_110	34	40	Yes								1.013	35.0054	Kitale	KE	KE499																				Komarova et al., 2020			KE499
	KE676	Lophuromys zena	aquilus	H_112	34	36	Yes								1.189	35.2602	Kapkanyar	KE	KE676																				Komarova et al., 2020			KE676
	KE7	Lophuromys zena	aquilus	H_110	34	37	Yes			Yes									Mt_KE7																				Komarova et al., 2020			KE7
	KE777	Lophuromys zena	aquilus	H_116	34	36	Yes								0.6021	35.773	Katimok	KE	KE777																				Komarova et al., 2020			KE777
	KE839	Lophuromys zena	aquilus	H_122	34	36	Yes			Yes					0.0449	36.3734	Nyahururu	KE	KE839																				Komarova et al., 2020			KE839
	KE840	Lophuromys zena	aquilus	H_121	34	36	Yes								0.0449	36.3734	Nyahururu	KE	KE840																				Komarova et al., 2020			KE840
	KR089027	Lophuromys zena	aquilus	H_113	34	36	Yes								-0.38328	36.7066	Aberdares	KE	Aberdares_KE_KR089027																				GenBank	KR089027		KR089027
	MN808297	Lophuromys zena	aquilus	H_136	34	37	Yes								-0.06902	37.3083	MtKenya	KE	KE20151057																				GenBank	MN808297		MN808297
	MN808300	Lophuromys zena	aquilus	H_135	34	37	Yes			Yes					-0.23943	36.7087	Aberdares	KE	Aberdares_KE_FMNH190332																				GenBank	MN808300		MN808300
	MN808301	Lophuromys zena	aquilus	H_110	34	37	Yes								-0.16263	37.4462	MtKenya	KE	Chogoria_KE_FMNH217021																				GenBank	MN808301		MN808301
	MN808303	Lophuromys zena	aquilus	H_110	34	36	Yes								-0.06534	37.2935	MtKenya	KE	KE20151117																				GenBank	MN808303		MN808303
	MN808308	Lophuromys zena	aquilus	H_110	34	36	Yes								-0.38328	36.7066	Aberdares	KE	Aberdares_KE_FMNH190333																				GenBank	MN808308		MN808308
	MN808313	Lophuromys zena	aquilus	H_110	34	36	Yes								-0.06069	37.2959	MtKenya	KE	KE20151133																				GenBank	MN808313		MN808313
	MN808314	Lophuromys zena	aquilus	H_110	34	36	Yes			Yes					0.00366	37.2445	MtKenya	KE	KE20151801																				GenBank	MN808314		MN808314
	MN808317	Lophuromys zena	aquilus	H_110	34	36	Yes					Yes			-0.23549	37.555	MtKenya	KE	KE20150095																				GenBank	MN808317		MN808317
	MN808320	Lophuromys zena	aquilus	H_110	34	37	Yes								-0.16263	37.4462	MtKenya	KE	Chogoria_KE_FMNH217107																				GenBank	MN808320		MN808320
	MN808321	Lophuromys zena	aquilus	H_110	34	37	Yes	Yes			Yes	Yes			-0.23784	37.587	MtKenya	KE	KE20150001																				GenBank	MN808321		MN808321
	MN808324	Lophuromys zena	aquilus	H_110	34	37	Yes								-0.16263	37.4462	MtKenya	KE	Chogoria_KE_FMNH217101																				GenBank	MN808324		MN808324
	MN808327	Lophuromys zena	aquilus	H_110	34	37	Yes			Yes		Yes			-0.18815	37.4745	MtKenya	KE	KE20150393																				GenBank	MN808327		MN808327
	MN808328	Lophuromys zena	aquilus	H_110	34	37	Yes								-0.16263	37.4462	MtKenya	KE	Chogoria_KE_FMNH217103																				GenBank	MN808328		MN808328
	R28489	Lophuromys zena	aquilus	H_110	34	36	Yes			Yes					-0.7002	36.3644	Gatamaiyu	KE	Gatamaiyu_KE_R28489																				African Mammalia			R28489
	ET12	Lophuromys brevicaudus	flavopunctatus	H_34	49	12	Yes			Yes					6.85	39.8813	Bale	ET	ET12_Bale_Sinburru_ET																				African Mammalia			ET12
	ET22	Lophuromys brevicaudus	flavopunctatus	H_30	49	12	Yes			Yes					6.85	39.8813	Bale	ET	ET22_Bale_Microwave_ET																				African Mammalia			ET22
	ETH0120	Lophuromys brevicaudus	flavopunctatus	H_31	49	12	Yes								7.5184	39.3099	Arsi	ET	ETH0120																				Komarova et al., 2020			ETH0120
	ETH0134	Lophuromys brevicaudus	flavopunctatus	H_34	49	12	Yes								7.1104	39.7468	Dinsho	ET	ETH0134																				Komarova et al., 2020			ETH0134
	ETH0136	Lophuromys brevicaudus	flavopunctatus	H_35	49	12	Yes								7.1104	39.7468	Dinsho	ET	ETH0136																				Komarova et al., 2020			ETH0136
	ETH0146	Lophuromys brevicaudus	flavopunctatus	H_33	49	12	Yes			Yes					7.1104	39.7468	Dinsho	ET	ETH0146																				Komarova et al., 2020			ETH0146
	ETH0173	Lophuromys brevicaudus	flavopunctatus	H_34	49	12	Yes								6.7918	39.7711	Bale	ET	ETH0173																				GenBank	MN817345		ETH0173
	ETH0181	Lophuromys brevicaudus	flavopunctatus	H_34	49	12	Yes								6.7724	39.7582	Bale	ET	ETH0181																				Komarova et al., 2020			ETH0181
	ETH0950	Lophuromys brevicaudus	flavopunctatus	H_34	49	12	Yes								6.9917	39.7025	Bale	ET	ETH0950																				Komarova et al., 2020			ETH0950
	ETH0973	Lophuromys brevicaudus	flavopunctatus	H_34	49	12	Yes								7.0946	39.7892	Bale	ET	ETH0973																				Komarova et al., 2020			ETH0973
	ETH0981	Lophuromys brevicaudus	flavopunctatus	H_34	49	12	Yes								7.0946	39.7892	Bale	ET	ETH0981																				Komarova et al., 2020			ETH0981
	ETH0982	Lophuromys brevicaudus	flavopunctatus	H_34	49	12	Yes								7.0946	39.7892	Bale	ET	ETH0982																				GenBank	MN817347		ETH0982
	LAV2671	Lophuromys brevicaudus	flavopunctatus	H_32	49	12	Yes			Yes					7.825	39.4141	Galama	ET	LAV2671																				Komarova et al., 2020			LAV2671
	LAV2749	Lophuromys brevicaudus	flavopunctatus	H_32	49	12	Yes			Yes					7.825	39.4141	Galama	ET	LAV2749																				Komarova et al., 2020			LAV2749
	LAV2756	Lophuromys brevicaudus	flavopunctatus	H_32	49	12	Yes			Yes					7.825	39.4141	Galama	ET	LAV2756																				Komarova et al., 2020			LAV2756
	LAV2772	Lophuromys brevicaudus	flavopunctatus	H_32	49	12	Yes			Yes					7.9182	39.1868	Chilalo	ET	LAV2772																				Komarova et al., 2020			LAV2772
	LAV2792	Lophuromys brevicaudus	flavopunctatus	H_32	49	12	Yes								7.9182	39.1868	Chilalo	ET	LAV2792																				Komarova et al., 2020			LAV2792
	LAV2793	Lophuromys brevicaudus	flavopunctatus	H_32	49	12	Yes								7.9182	39.1868	Chilalo	ET	LAV2793																				Komarova et al., 2020			LAV2793
	LAV2794	Lophuromys brevicaudus	flavopunctatus	H_32	49	12	Yes								7.9182	39.1868	Chilalo	ET	LAV2794																				Komarova et al., 2020			LAV2794
	ETH2038	Lophuromys brunneus	flavopunctatus	H_74	48	23	Yes								7.54049	36.5729	Jimma	ET	ETH2038																				GenBank	MN817385		ETH2038
	ETH2109	Lophuromys brunneus	flavopunctatus	H_73	48	23	Yes			Yes					7.52778	36.0667	Keffa	ET	ETH2109																				GenBank	MN817386		ETH2109
	ETH2132	Lophuromys brunneus	flavopunctatus	H_73	48	23	Yes			Yes					8.09105	35.4804	Gore	ET	ETH2132																				GenBank	MN817387		ETH2132
	ETH2145	Lophuromys brunneus	flavopunctatus	H_72	48	23	Yes			Yes					8.09598	35.4892	Gore	ET	ETH2145																				GenBank	MN817384		ETH2145
	LAV2506	Lophuromys brunneus	flavopunctatus	H_71	48	23	Yes								9.2258	34.8769	DhatiWelel	ET	LAV2506																				Komarova et al., 2020			LAV2506
	LAV2520	Lophuromys brunneus	flavopunctatus	H_73	48	23	Yes								9.2258	34.8769	DhatiWelel	ET	LAV2520																				Komarova et al., 2020			LAV2520
	LAV38	Lophuromys brunneus	flavopunctatus	H_74	48	23	Yes			Yes					9.2258	34.8769	DhatiWelel	ET	LAV38																				Komarova et al., 2020			LAV38
	ETH0066	Lophuromys chercherensis	flavopunctatus	H_79	46	15	Yes								8.9993	40.9066	AsbeTeferi	ET	ETH0066																				Komarova et al., 2020			ETH0066
	ETH0106	Lophuromys chercherensis	flavopunctatus	H_77	46	15	Yes			Yes					8.9987	40.9123	AsbeTeferi	ET	ETH0106																				Komarova et al., 2020			ETH0106
	ETH0107	Lophuromys chercherensis	flavopunctatus	H_79	46	15	Yes								8.9987	40.9123	AsbeTeferi	ET	ETH0107																				Komarova et al., 2020			ETH0107
	ETH1595	Lophuromys chercherensis	flavopunctatus	H_77	46	15	Yes								9.0007	40.8495	KuniMuktari	ET	ETH1595																				GenBank	MN817324		ETH1595
	ETH1607	Lophuromys chercherensis	flavopunctatus	H_77	46	15	Yes								9.0007	40.8495	KuniMuktari	ET	ETH1607																				Komarova et al., 2020			ETH1607
	ETH1608	Lophuromys chercherensis	flavopunctatus	H_77	46	15	Yes								9.0007	40.8495	KuniMuktari	ET	ETH1608																				Komarova et al., 2020			ETH1608
	ETH1609	Lophuromys chercherensis	flavopunctatus	H_75	46	15	Yes								9.0007	40.8495	KuniMuktari	ET	ETH1609																				Komarova et al., 2020			ETH1609
	ETH1610	Lophuromys chercherensis	flavopunctatus	H_78	46	15	Yes								9.0007	40.8495	KuniMuktari	ET	ETH1610																				Komarova et al., 2020			ETH1610
	LAV1006	Lophuromys chercherensis	flavopunctatus	H_77	46	15	Yes			Yes					9.33436	41.2656	CherCher	ET	LAV1006																				Komarova et al., 2020			LAV1006
	LAV1007	Lophuromys chercherensis	flavopunctatus	H_76	46	15	Yes			Yes					9.33436	41.2656	CherCher	ET	LAV1007																				Komarova et al., 2020			LAV1007
	LAV1009	Lophuromys chercherensis	flavopunctatus	H_77	46	15	Yes			Yes					9.33436	41.2656	CherCher	ET	LAV1009																				Komarova et al., 2020			LAV1009
	LAV1011	Lophuromys chercherensis	flavopunctatus	H_77	46	15	Yes			Yes					9.33436	41.2656	CherCher	ET	LAV1011																				Komarova et al., 2020			LAV1011
	ET23	Lophuromys chrysopus	flavopunctatus	H_17	56	14	Yes			Yes					6.51955	39.2341	Harenna	ET	ET23_Harenna_ET																				African Mammalia			ET23
	ETH0187	Lophuromys chrysopus	flavopunctatus	H_16	56	14	Yes								6.715	39.7239	Bale	ET	ETH0187																				Komarova et al., 2020			ETH0187
	ETH0198	Lophuromys chrysopus	flavopunctatus	H_19	56	14	Yes			Yes					6.7022	39.7247	Bale	ET	ETH0198																				Komarova et al., 2020			ETH0198
	ETH0199	Lophuromys chrysopus	flavopunctatus	H_18	56	14	Yes								6.7022	39.7247	Bale	ET	ETH0199																				Komarova et al., 2020			ETH0199
	ETH0200	Lophuromys chrysopus	flavopunctatus	H_17	56	14	Yes								6.7022	39.7247	Bale	ET	ETH0200																				Komarova et al., 2020			ETH0200
	ETH0220	Lophuromys chrysopus	flavopunctatus	H_19	56	14	Yes								6.6909	39.7277	Bale	ET	ETH0220																				Komarova et al., 2020			ETH0220
	ETH0221	Lophuromys chrysopus	flavopunctatus	H_19	56	14	Yes								6.6909	39.7277	Bale	ET	ETH0221																				Komarova et al., 2020			ETH0221
	ETH0665	Lophuromys chrysopus	flavopunctatus	H_26	57	19	Yes								7.0604	35.6719	MizanTeferi	ET	ETH0665																				Komarova et al., 2020			ETH0665
	ETH0679	Lophuromys chrysopus	flavopunctatus	H_23	57	19	Yes								7.0604	35.6719	MizanTeferi	ET	ETH0679																				Komarova et al., 2020			ETH0679
	ETH0689	Lophuromys chrysopus	flavopunctatus	H_24	57	19	Yes								7.0618	35.6731	MizanTeferi	ET	ETH0689																				Komarova et al., 2020			ETH0689
	ETH0692	Lophuromys chrysopus	flavopunctatus	H_28	57	19	Yes								7.0618	35.6731	MizanTeferi	ET	ETH0692																				Komarova et al., 2020			ETH0692
	ETH0697	Lophuromys chrysopus	flavopunctatus	H_24	57	19	Yes								7.0618	35.6731	MizanTeferi	ET	ETH0697																				Komarova et al., 2020			ETH0697
	ETH0702	Lophuromys chrysopus	flavopunctatus	H_27	57	19	Yes			Yes					7.0618	35.6731	MizanTeferi	ET	ETH0702																				Komarova et al., 2020			ETH0702
	ETH0714	Lophuromys chrysopus	flavopunctatus	H_23	57	19	Yes			Yes					7.0187	35.5569	MizanTeferi	ET	ETH0714																				Komarova et al., 2020			ETH0714
	ETH0724	Lophuromys chrysopus	flavopunctatus	H_29	57	19	Yes								7.0187	35.5569	MizanTeferi	ET	ETH0724																				Komarova et al., 2020			ETH0724
	ETH0725	Lophuromys chrysopus	flavopunctatus	H_23	57	19	Yes								7.0187	35.5569	MizanTeferi	ET	ETH0725																				Komarova et al., 2020			ETH0725
	ETH0726	Lophuromys chrysopus	flavopunctatus	H_29	57	19	Yes								7.0187	35.5569	MizanTeferi	ET	ETH0726																				Komarova et al., 2020			ETH0726
	ETH0915	Lophuromys chrysopus	flavopunctatus	H_21	59	20	Yes								6.1625	38.1955	YirgaCheffe	ET	ETH0915																				Komarova et al., 2020			ETH0915
	ETH0916	Lophuromys chrysopus	flavopunctatus	H_21	59	20	Yes			Yes					6.1625	38.1955	YirgaCheffe	ET	ETH0916																				Komarova et al., 2020			ETH0916
	ETH1406	Lophuromys chrysopus	flavopunctatus	H_23	57	19	Yes								6.9796	35.4958	Kite	ET	ETH1406																				Komarova et al., 2020			ETH1406
	ETH1407	Lophuromys chrysopus	flavopunctatus	H_23	57	19	Yes			Yes					6.9796	35.4958	Kite	ET	ETH1407																				Komarova et al., 2020			ETH1407
	ETH1409	Lophuromys chrysopus	flavopunctatus	H_23	57	19	Yes								6.9796	35.4958	Kite	ET	ETH1409																				Komarova et al., 2020			ETH1409
	ETH1410	Lophuromys chrysopus	flavopunctatus	H_25	57	19	Yes								6.9796	35.4958	Kite	ET	ETH1410																				Komarova et al., 2020			ETH1410
	ETH1439	Lophuromys chrysopus	flavopunctatus	H_23	57	19	Yes								6.9796	35.4958	Kite	ET	ETH1439																				Komarova et al., 2020			ETH1439
	ETH1441	Lophuromys chrysopus	flavopunctatus	H_23	57	19	Yes								6.9796	35.4958	Kite	ET	ETH1441																				Komarova et al., 2020			ETH1441
	ETH1442	Lophuromys chrysopus	flavopunctatus	H_23	57	19	Yes								6.9796	35.4958	Kite	ET	ETH1442																				Komarova et al., 2020			ETH1442
	ETH1478	Lophuromys chrysopus	flavopunctatus	H_23	57	19	Yes								7.5576	35.3996	Geche	ET	ETH1478																				Komarova et al., 2020			ETH1478
	ETH1506	Lophuromys chrysopus	flavopunctatus	H_23	57	19	Yes								7.4363	35.4041	Chingawa	ET	ETH1506																				Komarova et al., 2020			ETH1506
	ETH1549	Lophuromys chrysopus	flavopunctatus	H_23	57	19	Yes								7.4211	35.3999	Chingawa	ET	ETH1549																				Komarova et al., 2020			ETH1549
	ETH1567	Lophuromys chrysopus	flavopunctatus	H_23	57	19	Yes								7.308	36.0893	Wushwush	ET	ETH1567																				Komarova et al., 2020			ETH1567
	ETH2022	Lophuromys chrysopus	flavopunctatus	H_23	57	19	Yes								7.49373	36.5344	Jimma	ET	ETH2022																				GenBank	MN817367		ETH2022
	ETH2085	Lophuromys chrysopus	flavopunctatus	H_23	57	19	Yes								7.51185	36.0569	Keffa	ET	ETH2085																				GenBank	MN817369		ETH2085
	ETH2088	Lophuromys chrysopus	flavopunctatus	H_23	57	19	Yes			Yes					7.55563	36.0593	Keffa	ET	ETH2088																				GenBank	MN817368		ETH2088
	ETH2092	Lophuromys chrysopus	flavopunctatus	H_22	58	24	Yes								7.50935	36.0661	Keffa	ET	ETH2092																				GenBank	MN817366		ETH2092
	LAV2341	Lophuromys chrysopus	flavopunctatus	H_19	56	14	Yes								6.6445	39.7327	Bale	ET	LAV2341																				Komarova et al., 2020			LAV2341
	LAV2355	Lophuromys chrysopus	flavopunctatus	H_19	56	14	Yes								6.6445	39.7327	Bale	ET	LAV2355																				Komarova et al., 2020			LAV2355
	LAV67	Lophuromys chrysopus	flavopunctatus	H_20	58	24	Yes			Yes					6.6445	39.7327	Bale	ET	LAV67																				Komarova et al., 2020			LAV67
	LAV938	Lophuromys chrysopus	flavopunctatus	H_28	57	19	Yes			Yes					6.6445	39.7327	Bale	ET	LAV938																				Komarova et al., 2020			LAV938
	At37	Lophuromys flavopunctatus	flavopunctatus	H_66	18	4	Yes												At37																				African Mammalia			At37
	At42	Lophuromys flavopunctatus	flavopunctatus	H_59	22	5	Yes			Yes									At42																				African Mammalia			At42
	At8	Lophuromys flavopunctatus	flavopunctatus	H_60	22	5	Yes			Yes									At8																				African Mammalia			At8
	ET01	Lophuromys flavopunctatus	flavopunctatus	H_69	19	11	Yes			Yes									ET01																				African Mammalia			ET01
	ETH0009	Lophuromys flavopunctatus	flavopunctatus	H_69	19	11	Yes			Yes					8.9641	38.5421	Menagesha	ET	ETH0009																				Komarova et al., 2020			ETH0009
	ETH0011	Lophuromys flavopunctatus	flavopunctatus	H_69	19	11	Yes								8.9641	38.5421	Menagesha	ET	ETH0011																				Komarova et al., 2020			ETH0011
	ETH0732	Lophuromys flavopunctatus	flavopunctatus	H_59	22	5	Yes								7.2943	36.3763	Bonga	ET	ETH0732																				Komarova et al., 2020			ETH0732
	ETH1482	Lophuromys flavopunctatus	flavopunctatus	H_62	22	5	Yes			Yes					7.5576	35.3996	Geche	ET	ETH1482																				Komarova et al., 2020			ETH1482
	ETH1505	Lophuromys flavopunctatus	flavopunctatus	H_63	22	5	Yes								7.4363	35.4041	Chingawa	ET	ETH1505																				Komarova et al., 2020			ETH1505
	ETH1557	Lophuromys flavopunctatus	flavopunctatus	H_61	22	5	Yes								7.4211	35.3999	Chingawa	ET	ETH1557																				Komarova et al., 2020			ETH1557
	ETH1584	Lophuromys flavopunctatus	flavopunctatus	H_59	22	5	Yes								7.2827	36.1579	Wushwush	ET	ETH1584																				Komarova et al., 2020			ETH1584
	ETH1585	Lophuromys flavopunctatus	flavopunctatus	H_61	22	5	Yes								7.2827	36.1579	Wushwush	ET	ETH1585																				Komarova et al., 2020			ETH1585
	ETH1592	Lophuromys flavopunctatus	flavopunctatus	H_59	22	5	Yes								7.2827	36.1579	Wushwush	ET	ETH1592																				Komarova et al., 2020			ETH1592
	ETH1782	Lophuromys flavopunctatus	flavopunctatus	H_66	20	11	Yes								10.2939	39.8003	Guwasa	ET	ETH1782																				Komarova et al., 2020			ETH1782
	ETH1806	Lophuromys flavopunctatus	flavopunctatus	H_66	21	11	Yes			Yes					10.2939	39.8003	Guwasa	ET	ETH1806																				GenBank	MN817388		ETH1806
	ETH1810	Lophuromys flavopunctatus	flavopunctatus	H_66	20	11	Yes								10.2939	39.8003	Guwasa	ET	ETH1810																				Komarova et al., 2020			ETH1810
	ETH1824	Lophuromys flavopunctatus	flavopunctatus	H_66	21	11	Yes								10.2939	39.8003	Guwasa	ET	ETH1824																				Komarova et al., 2020			ETH1824
	ETH1828	Lophuromys flavopunctatus	flavopunctatus	H_66	20	11	Yes			Yes					10.2939	39.8003	Guwasa	ET	ETH1828																				GenBank	MN817378		ETH1828
	ETH1829	Lophuromys flavopunctatus	flavopunctatus	H_66	21	11	Yes								10.2939	39.8003	Guwasa	ET	ETH1829																				Komarova et al., 2020			ETH1829
	ETH1840	Lophuromys flavopunctatus	flavopunctatus	H_67	20	11	Yes			Yes					10.2939	39.8003	Guwasa	ET	ETH1840																				Komarova et al., 2020			ETH1840
	ETH1841	Lophuromys flavopunctatus	flavopunctatus	H_66	21	11	Yes			Yes					10.2939	39.8003	Guwasa	ET	ETH1841																				GenBank	MN817377		ETH1841
	ETH1852	Lophuromys flavopunctatus	flavopunctatus	H_66	21	11	Yes			Yes					10.2939	39.8003	Guwasa	ET	ETH1852																				Komarova et al., 2020			ETH1852
	ETH1853	Lophuromys flavopunctatus	flavopunctatus	H_66	21	11	Yes								10.2939	39.8003	Guwasa	ET	ETH1853																				Komarova et al., 2020			ETH1853
	ETH1869	Lophuromys flavopunctatus	flavopunctatus	H_66	21	11	Yes			Yes					10.2939	39.8003	Guwasa	ET	ETH1869																				GenBank	MN817375		ETH1869
	ETH2060	Lophuromys flavopunctatus	flavopunctatus	H_59	22	5	Yes								7.56294	36.0496	Keffa	ET	ETH2060																				GenBank	MN817372		ETH2060
	ETH2094	Lophuromys flavopunctatus	flavopunctatus	H_59	22	5	Yes			Yes					7.56294	36.0496	Keffa	ET	ETH2094																				GenBank	MN817371		ETH2094
	ETH2370	Lophuromys flavopunctatus	flavopunctatus	H_66	21	11	Yes								10.2908	39.7979	Guassa	ET	ETH2370																				Komarova et al., 2020			ETH2370
	ETH2381	Lophuromys flavopunctatus	flavopunctatus	H_66	21	11	Yes								10.2923	39.8026	Guassa	ET	ETH2381																				Komarova et al., 2020			ETH2381
	ETH2386	Lophuromys flavopunctatus	flavopunctatus	H_66	20	11	Yes								10.2933	39.7968	Guassa	ET	ETH2386																				Komarova et al., 2020			ETH2386
	ETH2387	Lophuromys flavopunctatus	flavopunctatus	H_67	20	11	Yes								10.2921	39.8027	Guassa	ET	ETH2387																				Komarova et al., 2020			ETH2387
	ETH2388	Lophuromys flavopunctatus	flavopunctatus	H_66	20	11	Yes								10.2931	39.7969	Guassa	ET	ETH2388																				Komarova et al., 2020			ETH2388
	ETH2389	Lophuromys flavopunctatus	flavopunctatus	H_66	21	11	Yes								10.2928	39.8021	Guassa	ET	ETH2389																				Komarova et al., 2020			ETH2389
	ETH2392	Lophuromys flavopunctatus	flavopunctatus	H_66	20	11	Yes								10.2925	39.7974	Guassa	ET	ETH2392																				Komarova et al., 2020			ETH2392
	ETH2414	Lophuromys flavopunctatus	flavopunctatus	H_67	20	11	Yes								10.2938	39.8003	Guassa	ET	ETH2414																				Komarova et al., 2020			ETH2414
	ETH2433	Lophuromys flavopunctatus	flavopunctatus	H_66	21	11	Yes			Yes					10.2954	39.8005	Guassa	ET	ETH2433																				Komarova et al., 2020			ETH2433
	ETH2437	Lophuromys flavopunctatus	flavopunctatus	H_66	20	11	Yes								10.2952	39.8003	Guassa	ET	ETH2437																				Komarova et al., 2020			ETH2437
	ETH2449	Lophuromys flavopunctatus	flavopunctatus	H_66	21	11	Yes								10.2943	39.8009	Guassa	ET	ETH2449																				Komarova et al., 2020			ETH2449
	ETH2451	Lophuromys flavopunctatus	flavopunctatus	H_68	21	11	Yes								10.2943	39.8011	Guassa	ET	ETH2451																				Komarova et al., 2020			ETH2451
	ETH2454	Lophuromys flavopunctatus	flavopunctatus	H_66	21	11	Yes								10.295	39.8003	Guassa	ET	ETH2454																				Komarova et al., 2020			ETH2454
	ETH2456	Lophuromys flavopunctatus	flavopunctatus	H_66	20	11	Yes								10.2954	39.7986	Guassa	ET	ETH2456																				Komarova et al., 2020			ETH2456
	ETH2491	Lophuromys flavopunctatus	flavopunctatus	H_66	21	11	Yes								10.2961	39.8002	Guassa	ET	ETH2491																				Komarova et al., 2020			ETH2491
	ETH2493	Lophuromys flavopunctatus	flavopunctatus	H_64	21	11	Yes								10.2957	39.8004	Guassa	ET	ETH2493																				Komarova et al., 2020			ETH2493
	ETH2494	Lophuromys flavopunctatus	flavopunctatus	H_66	20	11	Yes								10.2965	39.8	Guassa	ET	ETH2494																				Komarova et al., 2020			ETH2494
	ETH2506	Lophuromys flavopunctatus	flavopunctatus	H_66	20	11	Yes			Yes					10.2905	39.7972	Guassa	ET	ETH2506																				Komarova et al., 2020			ETH2506
	ETH2545	Lophuromys flavopunctatus	flavopunctatus	H_66	21	11	Yes								10.2954	39.7986	Guassa	ET	ETH2545																				Komarova et al., 2020			ETH2545
	ETH2555	Lophuromys flavopunctatus	flavopunctatus	H_65	21	11	Yes								10.2954	39.8004	Guassa	ET	ETH2555																				Komarova et al., 2020			ETH2555
	LAV1957	Lophuromys flavopunctatus	flavopunctatus	H_66	21	11	Yes			Yes									LAV1957																				Komarova et al., 2020			LAV1957
	LAV1964	Lophuromys flavopunctatus	flavopunctatus	H_70	21	11	Yes												LAV1964																				Komarova et al., 2020			LAV1964
	LAV1970	Lophuromys flavopunctatus	flavopunctatus	H_70	21	11	Yes												LAV1970																				Komarova et al., 2020			LAV1970
	R721	Lophuromys flavopunctatus	flavopunctatus	H_58	23	49	Yes			Yes					8.9641	38.5421	Menagesha	ET	R721																				African Mammalia			R721
	LAV2666	Lophuromys melanonyx 1	flavopunctatus	H_44	50	48	Yes			Yes					7.825	39.4141	Galama	ET	LAV2666																				Komarova et al., 2020			LAV2666
	LAV2672	Lophuromys melanonyx 1	flavopunctatus	H_45	50	48	Yes			Yes					7.825	39.4141	Galama	ET	LAV2672																				Komarova et al., 2020			LAV2672
	LAV2673	Lophuromys melanonyx 1	flavopunctatus	H_45	50	48	Yes			Yes					7.825	39.4141	Galama	ET	LAV2673																				Komarova et al., 2020			LAV2673
	ET15	Lophuromys melanonyx 2	flavopunctatus	H_168	40	13	Yes			Yes					6.85	39.8813	Bale	ET	ET15_Bale_ET																				African Mammalia			ET15
	ET21	Lophuromys melanonyx 2	flavopunctatus	H_169	40	13	Yes			Yes									ET21																				African Mammalia			ET21
	ET26	Lophuromys melanonyx 2	flavopunctatus	H_169	40	13	Yes			Yes									ET26																				African Mammalia			ET26
	ETH0159	Lophuromys melanonyx 2	flavopunctatus	H_169	40	13	Yes								6.85	39.8813	Bale	ET	ETH0159																				Komarova et al., 2020			ETH0159
	ETH0947	Lophuromys melanonyx 2	flavopunctatus	H_170	40	13	Yes			Yes					6.9917	39.7025	Bale	ET	ETH0947																				GenBank	MN817342		ETH0947
	ETH0948	Lophuromys melanonyx 2	flavopunctatus	H_171	40	13	Yes			Yes					6.9917	39.7025	Bale	ET	ETH0948																				GenBank	MN817343		ETH0948
	LAV2380	Lophuromys melanonyx 2	flavopunctatus	H_169	40	13	Yes								6.8507	39.883	Bale	ET	LAV2380																				Komarova et al., 2020			LAV2380
	LAV2390	Lophuromys melanonyx 2	flavopunctatus	H_169	40	13	Yes								6.8507	39.883	Bale	ET	LAV2390																				Komarova et al., 2020			LAV2390
	LAV2392	Lophuromys melanonyx 2	flavopunctatus	H_169	40	13	Yes								6.8507	39.883	Bale	ET	LAV2392																				Komarova et al., 2020			LAV2392
	LAV2395	Lophuromys melanonyx 2	flavopunctatus	H_169	40	13	Yes								6.8507	39.883	Bale	ET	LAV2395																				Komarova et al., 2020			LAV2395
	LAV2396	Lophuromys melanonyx 2	flavopunctatus	H_169	40	13	Yes								6.8507	39.883	Bale	ET	LAV2396																				Komarova et al., 2020			LAV2396
	LAV2398	Lophuromys melanonyx 2	flavopunctatus	H_169	40	13	Yes								6.8507	39.883	Bale	ET	LAV2398																				Komarova et al., 2020			LAV2398
	LAV2399	Lophuromys melanonyx 2	flavopunctatus	H_169	40	13	Yes								6.8507	39.883	Bale	ET	LAV2399																				Komarova et al., 2020			LAV2399
	LAV2643	Lophuromys melanonyx 2	flavopunctatus	H_167	41	13	Yes			Yes					7.825	39.4141	Galama	ET	LAV2643																				Komarova et al., 2020			LAV2643
	LAV2644	Lophuromys melanonyx 2	flavopunctatus	H_167	41	13	Yes			Yes					7.825	39.4141	Galama	ET	LAV2644																				Komarova et al., 2020			LAV2644
	LAV2657	Lophuromys melanonyx 2	flavopunctatus	H_166	42	13	Yes								7.825	39.4141	Galama	ET	LAV2657																				Komarova et al., 2020			LAV2657
	LAV2660	Lophuromys melanonyx 2	flavopunctatus	H_167	41	13	Yes			Yes					7.825	39.4141	Galama	ET	LAV2660																				Komarova et al., 2020			LAV2660
	LAV2667	Lophuromys melanonyx 2	flavopunctatus	H_167	41	13	Yes								7.825	39.4141	Galama	ET	LAV2667																				Komarova et al., 2020			LAV2667
	LAV2675	Lophuromys melanonyx 2	flavopunctatus	H_167	41	13	Yes			Yes					7.825	39.4141	Galama	ET	LAV2675																				Komarova et al., 2020			LAV2675
	LAV2752	Lophuromys melanonyx 2	flavopunctatus	H_167	41	13	Yes			Yes					7.825	39.4141	Galama	ET	LAV2752																				Komarova et al., 2020			LAV2752
	ETH1260	Lophuromys menageshae	flavopunctatus	H_159	45	22	Yes			Yes					10.8495	38.7916	BorenaSaynt	ET	ETH1260																				GenBank	MN817357		ETH1260
	ETH1263	Lophuromys menageshae	flavopunctatus	H_159	45	22	Yes			Yes					10.8495	38.7916	BorenaSaynt	ET	ETH1263																				GenBank	MT084851		ETH1263
	ETH1264	Lophuromys menageshae	flavopunctatus	H_159	45	22	Yes			Yes					10.8495	38.7916	BorenaSaynt	ET	ETH1264																				GenBank	MT084852		ETH1264
	ETH1265	Lophuromys menageshae	flavopunctatus	H_159	45	22	Yes								10.8495	38.7916	BorenaSaynt	ET	ETH1265																				Komarova et al., 2020			ETH1265
	ETH1268	Lophuromys menageshae	flavopunctatus	H_159	45	22	Yes			Yes					10.8495	38.7916	BorenaSaynt	ET	ETH1268																				GenBank	MT084853		ETH1268
	ETH1292	Lophuromys menageshae	flavopunctatus	H_159	45	22	Yes								10.8495	38.7916	BorenaSaynt	ET	ETH1292																				GenBank	MT084855		ETH1292
	ETH1296	Lophuromys menageshae	flavopunctatus	H_159	45	22	Yes								10.8495	38.7916	BorenaSaynt	ET	ETH1296																				GenBank	MT084858		ETH1296
	ETH1366	Lophuromys menageshae	flavopunctatus	H_159	45	22	Yes								10.8917	38.8098	BorenaSaynt	ET	ETH1366																				Komarova et al., 2020			ETH1366
	ETH1624	Lophuromys menageshae	flavopunctatus	H_159	45	22	Yes								10.8499	38.7937	BorenaSaynt	ET	ETH1624																				Komarova et al., 2020			ETH1624
	ETH1742	Lophuromys menageshae	flavopunctatus	H_159	45	22	Yes								11.0098	39.6634	Kombolcha	ET	ETH1742																				GenBank	MN817383		ETH1742
	ETH2380	Lophuromys menageshae	flavopunctatus	H_159	45	22	Yes			Yes					10.329	39.8546	Guassa	ET	ETH2380																				Komarova et al., 2020			ETH2380
	LAV868	Lophuromys menageshae	flavopunctatus	H_159	45	22	Yes			Yes									LAV868																				Komarova et al., 2020			LAV868
	LAV873	Lophuromys menageshae	flavopunctatus	H_159	45	22	Yes												LAV873																				Komarova et al., 2020			LAV873
	ETH0664	Lophuromys pseudosikapusi	flavopunctatus	H_80	47	18	Yes								7.0604	35.6719	MizanTeferi	ET	ETH0664																				Komarova et al., 2020			ETH0664
	ETH0669	Lophuromys pseudosikapusi	flavopunctatus	H_80	47	18	Yes			Yes					7.0604	35.6719	MizanTeferi	ET	ETH0669																				Komarova et al., 2020			ETH0669
	ETH0671	Lophuromys pseudosikapusi	flavopunctatus	H_80	47	18	Yes								7.0604	35.6719	MizanTeferi	ET	ETH0671																				Komarova et al., 2020			ETH0671
	ETH0677	Lophuromys pseudosikapusi	flavopunctatus	H_80	47	18	Yes								7.0604	35.6719	MizanTeferi	ET	ETH0677																				Komarova et al., 2020			ETH0677
	ETH0691	Lophuromys pseudosikapusi	flavopunctatus	H_80	47	18	Yes			Yes					7.0618	35.6731	MizanTeferi	ET	ETH0691																				Komarova et al., 2020			ETH0691
	ETH0693	Lophuromys pseudosikapusi	flavopunctatus	H_80	47	18	Yes								7.0618	35.6731	MizanTeferi	ET	ETH0693																				Komarova et al., 2020			ETH0693
	ETH0695	Lophuromys pseudosikapusi	flavopunctatus	H_80	47	18	Yes			Yes					7.0618	35.6731	MizanTeferi	ET	ETH0695																				Komarova et al., 2020			ETH0695
	ETH0696	Lophuromys pseudosikapusi	flavopunctatus	H_80	47	18	Yes			Yes					7.0618	35.6731	MizanTeferi	ET	ETH0696																				Komarova et al., 2020			ETH0696
	ETH1382	Lophuromys pseudosikapusi	flavopunctatus	H_80	47	18	Yes								6.7768	35.1933	Koji	ET	ETH1382																				Komarova et al., 2020			ETH1382
	LAV951	Lophuromys pseudosikapusi	flavopunctatus	H_80	47	18	Yes			Yes									LAV951																				Komarova et al., 2020			LAV951
	ETH0626	Lophuromys simensis 1	flavopunctatus	H_36	51	17	Yes								10.6375	37.835	Choqa	ET	ETH0626																				Komarova et al., 2020			ETH0626
	ETH0627	Lophuromys simensis 1	flavopunctatus	H_36	51	17	Yes								10.6375	37.835	Choqa	ET	ETH0627																				Komarova et al., 2020			ETH0627
	ETH0628	Lophuromys simensis 1	flavopunctatus	H_36	51	17	Yes			Yes					10.6375	37.835	Choqa	ET	ETH0628																				Komarova et al., 2020			ETH0628
	ETH0629	Lophuromys simensis 1	flavopunctatus	H_36	51	17	Yes								10.6375	37.835	Choqa	ET	ETH0629																				Komarova et al., 2020			ETH0629
	ETH0640	Lophuromys simensis 1	flavopunctatus	H_36	51	17	Yes								10.6375	37.835	Choqa	ET	ETH0640																				Komarova et al., 2020			ETH0640
	ETH0642	Lophuromys simensis 1	flavopunctatus	H_40	51	17	Yes								10.6375	37.835	Choqa	ET	ETH0642																				Komarova et al., 2020			ETH0642
	ETH0643	Lophuromys simensis 1	flavopunctatus	H_36	51	17	Yes								10.6375	37.835	Choqa	ET	ETH0643																				Komarova et al., 2020			ETH0643
	ETH1130	Lophuromys simensis 1	flavopunctatus	H_41	51	21	Yes								12.072	39.3689	AboyeGara	ET	ETH1130																				GenBank	MT084845		ETH1130
	ETH1131	Lophuromys simensis 1	flavopunctatus	H_41	51	21	Yes			Yes					12.072	39.3689	AboyeGara	ET	ETH1131																				GenBank	MN817339		ETH1131
	ETH1142	Lophuromys simensis 1	flavopunctatus	H_41	51	21	Yes								12.072	39.3689	AboyeGara	ET	ETH1142																				Komarova et al., 2020			ETH1142
	ETH1147	Lophuromys simensis 1	flavopunctatus	H_41	51	21	Yes								12.072	39.3689	AboyeGara	ET	ETH1147																				Komarova et al., 2020			ETH1147
	ETH1148	Lophuromys simensis 1	flavopunctatus	H_41	51	21	Yes								12.072	39.3689	AboyeGara	ET	ETH1148																				Komarova et al., 2020			ETH1148
	ETH1191	Lophuromys simensis 1	flavopunctatus	H_41	51	21	Yes			Yes					12.0841	39.3617	AboyeGara	ET	ETH1191																				GenBank	MT084847		ETH1191
	ETH1194	Lophuromys simensis 1	flavopunctatus	H_41	51	21	Yes								12.0841	39.3617	AboyeGara	ET	ETH1194																				Komarova et al., 2020			ETH1194
	ETH1212	Lophuromys simensis 1	flavopunctatus	H_41	51	21	Yes								12.0841	39.3617	AboyeGara	ET	ETH1212																				Komarova et al., 2020			ETH1212
	LAV1119	Lophuromys simensis 1	flavopunctatus	H_42	51	21	Yes			Yes									LAV1119																				Komarova et al., 2020			LAV1119
	LAV3231	Lophuromys simensis 1	flavopunctatus	H_36	51	17	Yes												LAV3231																				Komarova et al., 2020			LAV3231
	LAV3275	Lophuromys simensis 1	flavopunctatus	H_36	51	17	Yes												LAV3275																				Komarova et al., 2020			LAV3275
	LAV3299	Lophuromys simensis 1	flavopunctatus	H_36	51	17	Yes												LAV3299																				Komarova et al., 2020			LAV3299
	LAV3304	Lophuromys simensis 1	flavopunctatus	H_36	51	17	Yes												LAV3304																				Komarova et al., 2020			LAV3304
	LAV3306	Lophuromys simensis 1	flavopunctatus	H_36	51	17	Yes												LAV3306																				Komarova et al., 2020			LAV3306
	LAV3310	Lophuromys simensis 1	flavopunctatus	H_38	51	17	Yes												LAV3310																				Komarova et al., 2020			LAV3310
	LAV3311	Lophuromys simensis 1	flavopunctatus	H_36	51	17	Yes												LAV3311																				Komarova et al., 2020			LAV3311
	LAV3315	Lophuromys simensis 1	flavopunctatus	H_36	51	17	Yes												LAV3315																				Komarova et al., 2020			LAV3315
	LAV3316	Lophuromys simensis 1	flavopunctatus	H_36	51	17	Yes												LAV3316																				Komarova et al., 2020			LAV3316
	LAV3322	Lophuromys simensis 1	flavopunctatus	H_39	51	17	Yes												LAV3322																				Komarova et al., 2020			LAV3322
	LAV3382	Lophuromys simensis 1	flavopunctatus	H_37	51	17	Yes												LAV3382																				Komarova et al., 2020			LAV3382
	LAV3398	Lophuromys simensis 1	flavopunctatus	H_36	51	17	Yes												LAV3398																				Komarova et al., 2020			LAV3398
	MY001007	Lophuromys simensis 1	flavopunctatus	H_43	51	21	Yes			Yes									MY001007																				African Mammalia			MY001007
	ETH0571	Lophuromys simensis 2	flavopunctatus	H_162	43	16	Yes			Yes					13.2319	38.0378	Simien	ET	ETH0571																				Komarova et al., 2020			ETH0571
	EWC12246	Lophuromys simensis 2	flavopunctatus	H_163	43	16	Yes			Yes									EWC12246																				GenBank	MN223627		EWC12246
	Hap144	Lophuromys simensis 2	flavopunctatus	H_163	43	16	Yes											ET	CXLIV																				African Mammalia			Hap144
	Hap145	Lophuromys simensis 2	flavopunctatus	H_163	43	16	Yes											ET	CXLV																				African Mammalia			Hap145
	Hap146	Lophuromys simensis 2	flavopunctatus	H_164	43	16	Yes											ET	CXLVI																				African Mammalia			Hap146
	Hap147	Lophuromys simensis 2	flavopunctatus	H_165	43	16	Yes			Yes								ET	CXLVII																				African Mammalia			Hap147
	Hap148	Lophuromys simensis 2	flavopunctatus	H_161	43	16	Yes			Yes								ET	CXLVIII																				African Mammalia			Hap148
	Hap149	Lophuromys simensis 2	flavopunctatus	H_163	43	16	Yes			Yes								ET	CXLIX																				African Mammalia			Hap149
	Hap150	Lophuromys simensis 2	flavopunctatus	H_162	43	16	Yes			Yes								ET	CL																				African Mammalia			Hap150
	LAV1111	Lophuromys simensis 2	flavopunctatus	H_160	44	16	Yes			Yes									LAV1111																				Komarova et al., 2020			LAV1111
	Z96064	Acomys ignitus	Outgroup	xout3			Yes			Yes					-1.52049	37.2472	Machakos	KE	Machakos_KE_Z96064																				GenBank			Z96064
	EU349745	Deomys ferrugineus	Outgroup	xout1			Yes			Yes									EU349745																				GenBank			EU349745
	HM635858	Uranomys ruddi	Outgroup	xout2			Yes			Yes					9.6087	14.2113	Doue	TD	HM635858																				GenBank			HM635858
	ANG0208	Lophuromys angolensis	sikapusi	H_222	7	3	Yes			Yes					-11.911	14.8753	Namba	AO	ANG0208																				African Mammalia			ANG0208
	ANG0233	Lophuromys angolensis	sikapusi	H_223	7	3	Yes			Yes					-11.911	14.8753	Namba	AO	ANG0233																				African Mammalia			ANG0233
	ANG0281	Lophuromys angolensis	sikapusi	H_221	7	3	Yes			Yes					-11.1544	14.2929	Kumbira	AO	ANG0281																				African Mammalia			ANG0281
	KIK1845	Lophuromys angolensis	sikapusi	H_224	9	3	Yes			Yes					-7.46092	29.5471	Mwambala	CD	KIK1845																				African Mammalia			KIK1845
	ZA200	Lophuromys angolensis	sikapusi	H_225	8	3	Yes			Yes					-5.03	18.55	Mbwambala	CD	ZA200																				African Mammalia			ZA200
	FMNH137798	Lophuromys ansorgei	sikapusi	H_237	12	27	Yes			Yes					0.9138	31.6547	Luwunga	UG	KN089026_FMNH137798																				GenBank	KR089026		FMNH137798
	FMNH137802	Lophuromys ansorgei	sikapusi	H_237	12	27	Yes			Yes					-0.00528	32.2833	Bugala	UG	Bugala_UG_FMNH137802																				New [this study]			FMNH137802
	FMNH165027	Lophuromys ansorgei	sikapusi	H_237	12	27	Yes			Yes					1.73333	31.4667	Budongo	UG	Budogo_UG_FMNH165027																				New [this study]			FMNH165027
	FMNH225171	Lophuromys ansorgei	sikapusi	H_238	12	27	Yes			Yes			Yes	Yes	0.9138	31.6547	Luwunga	UG	Luwunga_UG_FMNH225171	FMNH: 225171	2013	Male	Young adult	57.92	29.73	15.5	13.65	12.24	8.59	7.64	7.8	7.34	6.58	5.14	5.34	5.52	3.89	3.04	New [this study]			FMNH225171
	Hap188	Lophuromys ansorgei	sikapusi	H_234	12	27	Yes								0.34835	34.8714	Kakamega	KE	CLXXXVIII																				African Mammalia			Hap188
	KE2018080877	Lophuromys ansorgei	sikapusi	H_235	12	27	Yes								0.05428	34.1479	Yala	KE	KE2018080877	KIZ-NMK: 2018080877																			New [this study]			KE2018080877
	KE2018080902	Lophuromys ansorgei	sikapusi	H_237	12	27	Yes								0.06224	34.1401	Yala	KE	KE2018080902	KIZ-NMK: 2018080902																			New [this study]			KE2018080902
	KE2018080903	Lophuromys ansorgei	sikapusi	H_237	12	27	Yes			Yes					0.06092	34.147	Yala	KE	KE2018080903	KIZ-NMK: 2018080903																			New [this study]			KE2018080903
	KE2018080942	Lophuromys ansorgei	sikapusi	H_236	12	27	Yes								0.06214	34.1403	Yala	KE	KE2018080942	KIZ-NMK: 2018080942																			New [this study]			KE2018080942
	KE2018081084	Lophuromys ansorgei	sikapusi	H_237	12	27	Yes			Yes					0.34835	34.8714	Kakamega	KE	KE2018081084	KIZ-NMK: 2018081084																			New [this study]			KE2018081084
	KE2018081098	Lophuromys ansorgei	sikapusi	H_237	12	27	Yes								0.34838	34.8714	Kakamega	KE	KE2018081098	KIZ-NMK: 2018081098																			New [this study]			KE2018081098
	KE333	Lophuromys ansorgei	sikapusi	H_237	12	27	Yes								0.2428	34.8653	Kakamega	KE	KE333																				African Mammalia			KE333
	Hap152	Lophuromys huttereri	sikapusi	H_231	10	43	Yes			Yes					-2.61707	20.0496	Yoko	CD	CLII																				African Mammalia			Hap152
	N27106	Lophuromys huttereri	sikapusi	H_232	10	43	Yes			Yes					-2.61707	20.0496	Yoko	CD	N27106																				African Mammalia			N27106
	CAK174	Lophuromys nudicaudus	sikapusi	H_9	15	6	Yes			Yes									CAK174																				African Mammalia			CAK174
	R12419	Lophuromys nudicaudus	sikapusi	H_13	16	6	Yes												R12419																				African Mammalia			R12419
	R13387	Lophuromys nudicaudus	sikapusi	H_15	17	6	Yes			Yes									R13387																				GenBank	MN817303		R13387
	R13651	Lophuromys nudicaudus	sikapusi	H_15	17	6	Yes			Yes									R13651																				GenBank	MN817304		R13651
	R14197	Lophuromys nudicaudus	sikapusi	H_14	17	6	Yes												R14197																				African Mammalia			R14197
	R16120	Lophuromys nudicaudus	sikapusi	H_10	15	6	Yes												R16120																				African Mammalia			R16120
	R18224	Lophuromys nudicaudus	sikapusi	H_13	16	6	Yes												R18224																				African Mammalia			R18224
	R18280	Lophuromys nudicaudus	sikapusi	H_12	16	6	Yes			Yes									R18280																				African Mammalia			R18280
	R19415	Lophuromys nudicaudus	sikapusi	H_12	16	6	Yes												R19415																				African Mammalia			R19415
	R22303	Lophuromys nudicaudus	sikapusi	H_11	15	6	Yes			Yes									R22303																				African Mammalia			R22303
	R22344	Lophuromys nudicaudus	sikapusi	H_11	15	6	Yes												R22344																				African Mammalia			R22344
	CD7281	Lophuromys rahmi	sikapusi	H_233	11	8	Yes								-2.15004	28.41	Kamugondo	CD	Kamugondo_CD_7281																				African Mammalia			CD7281
	FMNH149161	Lophuromys rahmi	sikapusi	H_233	11	8	Yes			Yes					-2.85893	29.4201	Kibira	BI	Kibira_BI_FMNH149161																				New [this study]			FMNH149161
	G10051	Lophuromys roseveari	sikapusi	H_227	13	41	Yes			Yes					-1.38	13.35	Franceville	GA	G10051																				African Mammalia			G10051
	G10080	Lophuromys roseveari	sikapusi	H_227	13	41	Yes								-1.38	13.35	Franceville	GA	G10080																				African Mammalia			G10080
	G10081	Lophuromys roseveari	sikapusi	H_227	13	41	Yes								-1.38	13.35	Franceville	GA	G10081																				African Mammalia			G10081
	G10082	Lophuromys roseveari	sikapusi	H_227	13	41	Yes								-1.38	13.35	Franceville	GA	G10082																				African Mammalia			G10082
	G10083	Lophuromys roseveari	sikapusi	H_229	13	41	Yes								-1.38	13.35	Franceville	GA	G10083																				African Mammalia			G10083
	G10085	Lophuromys roseveari	sikapusi	H_227	13	41	Yes								-1.38	13.35	Franceville	GA	G10085																				African Mammalia			G10085
	G10107	Lophuromys roseveari	sikapusi	H_227	13	41	Yes								-1.38	13.35	Franceville	GA	G10107																				African Mammalia			G10107
	GA3891	Lophuromys roseveari	sikapusi	H_227	13	41	Yes												GA3891																				African Mammalia			GA3891
	GA3895	Lophuromys roseveari	sikapusi	H_227	13	41	Yes												GA3895																				African Mammalia			GA3895
	GA3969	Lophuromys roseveari	sikapusi	H_230	13	41	Yes			Yes									GA3969																				African Mammalia			GA3969
	GA4009	Lophuromys roseveari	sikapusi	H_227	13	41	Yes			Yes									GA4009																				African Mammalia			GA4009
	GA4020	Lophuromys roseveari	sikapusi	H_228	13	41	Yes												GA4020																				African Mammalia			GA4020
	GA4054	Lophuromys roseveari	sikapusi	H_227	13	41	Yes												GA4054																				African Mammalia			GA4054
	GA4055	Lophuromys roseveari	sikapusi	H_227	13	41	Yes			Yes									GA4055																				African Mammalia			GA4055
	GA4080	Lophuromys roseveari	sikapusi	H_227	13	41	Yes												GA4080																				African Mammalia			GA4080
	GA4086	Lophuromys roseveari	sikapusi	H_227	13	41	Yes												GA4086																				African Mammalia			GA4086
	GA4159	Lophuromys roseveari	sikapusi	H_227	13	41	Yes												GA4159																				African Mammalia			GA4159
	GA4160	Lophuromys roseveari	sikapusi	H_227	13	41	Yes			Yes									GA4160																				African Mammalia			GA4160
	GA4181	Lophuromys roseveari	sikapusi	H_227	13	41	Yes												GA4181																				African Mammalia			GA4181
	GA4232	Lophuromys roseveari	sikapusi	H_227	13	41	Yes												GA4232																				African Mammalia			GA4232
	GA4241	Lophuromys roseveari	sikapusi	H_227	13	41	Yes												GA4241																				African Mammalia			GA4241
	N13517	Lophuromys roseveari	sikapusi	H_226	14	41	Yes			Yes									N13517																				African Mammalia			N13517
	R22209	Lophuromys roseveari	sikapusi	H_227	13	41	Yes												R22209																				African Mammalia			R22209
	R22214	Lophuromys roseveari	sikapusi	H_227	13	41	Yes												R22214																				African Mammalia			R22214
	R22234	Lophuromys roseveari	sikapusi	H_227	13	41	Yes												R22234																				African Mammalia			R22234
	AJ012023	Lophuromys sikapusi	sikapusi	H_208	1	1	Yes			Yes	Yes	Yes			13.4055	15.0175	Lamto	CI	AJ012023																				GenBank	AJ012023		AJ012023
	AKB479	Lophuromys sikapusi	sikapusi	H_216	3	2	Yes			Yes									AKB479																				African Mammalia			AKB479
	DV0035	Lophuromys sikapusi	sikapusi	H_218	4	10	Yes			Yes									DV0035																				African Mammalia			DV0035
	DV0038	Lophuromys sikapusi	sikapusi	H_218	4	10	Yes			Yes									DV0038																				African Mammalia			DV0038
	EV101	Lophuromys sikapusi	sikapusi	H_216	3	2	Yes			Yes									EV101																				African Mammalia			EV101
	EV102	Lophuromys sikapusi	sikapusi	H_216	3	2	Yes			Yes									EV102																				African Mammalia			EV102
	EV104	Lophuromys sikapusi	sikapusi	H_216	3	2	Yes			Yes									EV104																				African Mammalia			EV104
	EV96	Lophuromys sikapusi	sikapusi	H_216	3	2	Yes			Yes									EV96																				African Mammalia			EV96
	EV97	Lophuromys sikapusi	sikapusi	H_216	3	2	Yes			Yes									EV97																				African Mammalia			EV97
	EV99	Lophuromys sikapusi	sikapusi	H_217	3	2	Yes			Yes									EV99																				African Mammalia			EV99
	Hap228	Lophuromys sikapusi	sikapusi	H_208	1	1	Yes			Yes								CI	CCXXVIII																				African Mammalia			Hap228
	Hap235	Lophuromys sikapusi	sikapusi	H_214	2	45	Yes								7.36703	4.13179	Asejire	NG	CCXXXV																				African Mammalia			Hap235
	KT232249	Lophuromys sikapusi	sikapusi	H_215	2	45	Yes			Yes					7.5016	4.53472	IleIfe	NG	XCII																				GenBank			KT232249
	LOS01	Lophuromys sikapusi	sikapusi	H_214	2	45	Yes								7.46	4.34	Osogbo	NG	LOS01																				African Mammalia			LOS01
	LOS02	Lophuromys sikapusi	sikapusi	H_211	2	45	Yes								7.46	4.34	Osogbo	NG	LOS02																				African Mammalia			LOS02
	LOS03	Lophuromys sikapusi	sikapusi	H_211	2	45	Yes												LOS03																				African Mammalia			LOS03
	LOS04	Lophuromys sikapusi	sikapusi	H_209	2	45	Yes												LOS04																				African Mammalia			LOS04
	LOS05	Lophuromys sikapusi	sikapusi	H_214	2	45	Yes								7.46	4.34		NG	LOS05																				African Mammalia			LOS05
	LOS07	Lophuromys sikapusi	sikapusi	H_214	2	45	Yes			Yes									LOS07																				African Mammalia			LOS07
	LOS08	Lophuromys sikapusi	sikapusi	H_212	2	45	Yes												LOS08																				African Mammalia			LOS08
	LOS09	Lophuromys sikapusi	sikapusi	H_213	2	45	Yes												LOS09																				African Mammalia			LOS09
	LOS10	Lophuromys sikapusi	sikapusi	H_210	2	45	Yes			Yes					7.46	4.34	Osogbo	NG	LOS10																				African Mammalia			LOS10
	P1400	Lophuromys sikapusi	sikapusi	H_219	4	10	Yes			Yes									P1400																				African Mammalia			P1400
	P1403	Lophuromys sikapusi	sikapusi	H_220	4	10	Yes												P1403																				African Mammalia			P1403
	P1728	Lophuromys sikapusi	sikapusi	H_220	4	10	Yes			Yes									P1728																				African Mammalia			P1728
	P2063	Lophuromys sikapusi	sikapusi	H_218	4	10	Yes												P2063																				African Mammalia			P2063
	P2304	Lophuromys sikapusi	sikapusi	H_218	4	10	Yes			Yes									P2304																				African Mammalia			P2304
	Hap236	Lophuromys sp. 1	sikapusi	H_8	5	46	Yes			Yes					9.59765	-13.5203	Conakry	CI	CCXXXVI																				African Mammalia			Hap236
	N24840	Lophuromys sp. 1	sikapusi	H_7	6	46	Yes			Yes									N24840																				African Mammalia			N24840
	R24839	Lophuromys sp. 1	sikapusi	H_8	5	46	Yes			Yes									R24839																				African Mammalia			R24839
	Hap168	Lophuromys luteogaster	woosnami	H_3	61	44	Yes			Yes					0.53705	25.2181	Kisangani	CD	CLXVIII																				African Mammalia			Hap168
	Hap169	Lophuromys luteogaster	woosnami	H_3	61	44	Yes								0.53705	25.2181	Kisangani	CD	CLXIX																				African Mammalia			Hap169
	Hap170	Lophuromys luteogaster	woosnami	H_3	61	44	Yes			Yes					0.53705	25.2181	Kisangani	CD	CLXX																				African Mammalia			Hap170
	Hap171	Lophuromys luteogaster	woosnami	H_1	61	44	Yes								-1.43365	23.8666	Yele	CD	CLXXI																				African Mammalia			Hap171
	Hap172	Lophuromys luteogaster	woosnami	H_2	61	44	Yes			Yes					0.80572	24.4472	Yangambi	CD	CLXXII																				African Mammalia			Hap172
	Hap173	Lophuromys luteogaster	woosnami	H_2	61	44	Yes								0.80572	24.4472	Yangambi	CD	CLXXIII																				African Mammalia			Hap173
	Hap174	Lophuromys luteogaster	woosnami	H_3	61	44	Yes								0.80572	24.4472	Yangambi	CD	CLXXIV																				African Mammalia			Hap174
	Hap175	Lophuromys luteogaster	woosnami	H_3	61	44	Yes								0.80572	24.4472	Yangambi	CD	CLXXV																				African Mammalia			Hap175
	Hap176	Lophuromys luteogaster	woosnami	H_3	61	44	Yes								0.80572	24.4472	Yangambi	CD	CLXXVI																				African Mammalia			Hap176
	Hap177	Lophuromys luteogaster	woosnami	H_3	61	44	Yes								0.80572	24.4472	Yangambi	CD	CLXXVII																				African Mammalia			Hap177
	Hap178	Lophuromys luteogaster	woosnami	H_1	61	44	Yes			Yes					0.80572	24.4472	Yangambi	CD	CLXXVIII																				African Mammalia			Hap178
	Hap179	Lophuromys luteogaster	woosnami	H_1	61	44	Yes			Yes					0.80572	24.4472	Yangambi	CD	CLXXIX																				African Mammalia			Hap179
	Hap180	Lophuromys luteogaster	woosnami	H_4	61	44	Yes								0.80572	24.4472	Yangambi	CD	CLXXX																				African Mammalia			Hap180
	Hap181	Lophuromys luteogaster	woosnami	H_4	61	44	Yes			Yes					0.80572	24.4472	Yangambi	CD	CLXXXI																				African Mammalia			Hap181
	FMNH144839	Lophuromys woosnami	woosnami	H_6	60	28	Yes			Yes					0.35	30	Rwenzori	UG	FMNH144839																				GenBank			FMNH144839
	FMNH144840	Lophuromys woosnami	woosnami	H_6	60	28	Yes			Yes					0.35	30	Rwenzori	UG	FMNH144840																				GenBank			FMNH144840
	FMNH144893	Lophuromys woosnami	woosnami	H_5	60	28	Yes			Yes					0.3666	29.9833	Rwenzori	UG	FMNH144893																				GenBank			FMNH144893
